# Supplementary material for: Water-promoted defluorinative synthesis of fluoroalkylated 1,5-diazapentadienes by using (NH4)2CO3 as an NH2 and NH source
Source: Royal Society of Chemistry journal article supplement (doi:10.1039/d3gc03717g), 2023-01-01

## Supporting Information

### Water-Promoted Defluorinative Synthesis of Fluoroalkylated 1,5-Diazapentadienes by Using $(\text{NH}_4)_2\text{CO}_3$ as $\text{NH}_2$ and $\text{NH}$ Sources

Wei Han,<sup>a,#</sup> Yu-Lan Chen,<sup>a,#</sup> Xi Tang,<sup>a</sup> Jie Zhou,<sup>\*,b</sup> Mengtao Ma,<sup>c</sup> Zhi-Liang Shen<sup>\*,a</sup>  
Xue-Qiang Chu<sup>\*,a</sup>

<sup>a</sup> Technical Institute of Fluorochemistry, Institute of Advanced Synthesis, School of Chemistry and Molecular Engineering, Nanjing Tech University, Nanjing 211816, China. E-mails: [ias\\_zlshen@njtech.edu.cn](mailto:ias_zlshen@njtech.edu.cn); [xueqiangchu@njtech.edu.cn](mailto:xueqiangchu@njtech.edu.cn).

<sup>b</sup> State Key Laboratory of Materials-Oriented Chemical Engineering, College of Biotechnology and Pharmaceutical Engineering, Nanjing Tech University, Nanjing 211816, China. E-mail: [jayzhou@njtech.edu.cn](mailto:jayzhou@njtech.edu.cn).

<sup>c</sup> Department of Chemistry and Materials Science, College of Science, Nanjing Forestry University, Nanjing 210037, China.

<sup>#</sup> W. H. and Y.-L. C. contributed equally to this work.

### Table of Contents

|                                                                                                        |          |
|--------------------------------------------------------------------------------------------------------|----------|
| General information                                                                                    | Page S2  |
| General procedure for the synthesis of polyfluoroalkylated alkenes <b>1</b>                            | Page S2  |
| General procedure for the defluorinative synthesis of fluoroalkylated<br>1,5-diazapentadienes <b>2</b> | Page S3  |
| Scale-up synthesis of product <b>2a</b>                                                                | Page S4  |
| Further transformations of product <b>2a</b>                                                           | Page S4  |
| Mechanistic studies                                                                                    | Page S5  |
| Optimization of the reaction conditions                                                                | Page S10 |
| The X-ray crystal structures of products <b>2k</b> and <b>Z-10a</b>                                    | Page S11 |
| Characterization data for products                                                                     | Page S13 |
| Reference                                                                                              | Page S27 |
| <sup>1</sup> H, <sup>19</sup> F, and <sup>13</sup> C NMR spectra of products                           | Page S28 |

## General information

Unless otherwise stated, all reagents were purchased from commercial suppliers and used without further purification. All reactions were carried out under N<sub>2</sub> atmosphere using undistilled solvent. Melting points were recorded on an electrothermal digital melting point apparatus. IR spectra were recorded on a FT-IR spectrophotometer using KBr optics. <sup>1</sup>H, <sup>19</sup>F, and <sup>13</sup>C NMR spectra were recorded in CDCl<sub>3</sub> on Bruker Avance or Joel 400 MHz spectrometers. NMR splitting patterns are designated as singlet (s), doublet (d), triplet (t), quartet (q), quintet (quint), multiplet (m), broad (br), doublet of doublets (dd), doublet of triplets (dt), doublet of quartets (dq), triplet of doublets (td), tt (triplet of triplets), quartet of doublets (qd), and quartet of triplets (qt). The chemical shifts ( $\delta$ ) are reported in ppm and coupling constants (*J*) in Hz. High resolution mass spectrometry (HRMS) data were obtained on a Waters LC-TOF mass spectrometer (Xevo G2-XS QToF) using electrospray ionization (ESI) in positive or negative mode. A suitable crystal was selected and recorded on a XtaLAB AFC12 (RINC): Kappa single diffractometer. Column chromatography was generally performed on silica gel (300-400 mesh) and reactions were monitored by thin layer chromatography (TLC) using UV light to visualize the course of the reactions.

## General procedure for the synthesis of polyfluoroalkylated alkenes 1

### General procedure A (GPA)<sup>[1]</sup>

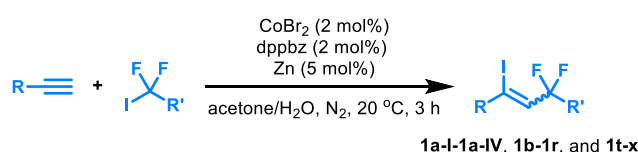

According to Jacobi von Wangelin's reported method, a solution of alkyne (511.0 mg, 5 mmol, 1 equiv.), perfluorobutyl iodide (2594.4 mg, 7.5 mmol, 1.5 equiv.), CoBr<sub>2</sub> (21.9 mg, 0.1 mmol, 0.02 equiv.), 1,2-bis(diphenylphosphino)benzene (44.6 mg, 0.1 mmol, 0.02 equiv., dppbz), and Zn (16.3 mg, 0.25 mmol, 0.05 equiv.) in acetone/H<sub>2</sub>O (10 mL, 30/1) was stirred at 20 °C under N<sub>2</sub> for 3 h. The reaction was then quenched by saturated NH<sub>4</sub>Cl solution (50 mL) and extracted with EtOAc (50 mL x 3). The organic layer was washed with saturated brine twice, dried over MgSO<sub>4</sub>, and concentrated under reduced pressure. The crude product was purified by flash silica gel column chromatography (300-400 mesh) using petroleum ether/ethyl acetate (200/1~20/1) as eluent to afford the pure product **1**.

### General procedure B (GPB)<sup>[2]</sup>

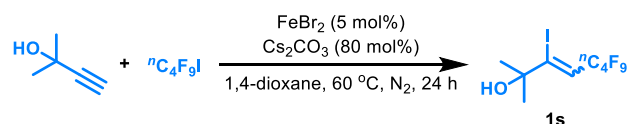

According to Hu's reported method, a solution of 2-methylbut-3-yn-2-ol (420.6 mg, 5 mmol, 1 equiv.), perfluorobutyl iodide (2594.4 mg, 7.5 mmol, 1.5 equiv.), FeBr<sub>2</sub> (53.9 mg, 0.25 mmol, 0.05 equiv.), and Cs<sub>2</sub>CO<sub>3</sub> (1303.0 mg, 4 mmol, 0.8 equiv.) in anhydrous 1,4-dioxane (20 mL) was stirred at 60 °C under N<sub>2</sub> for 24 h. The reaction was then quenched by saturated NH<sub>4</sub>Cl solution (50 mL) and extracted with EtOAc (50 mL x 3). The organic layer was washed with saturated brine twice, dried over MgSO<sub>4</sub>, and concentrated under reduced pressure. The crude product was

purified by flash silica gel column chromatography (300-400 mesh) using petroleum ether/ethyl acetate (100/1~80/1) as eluent to afford the pure product **1s** (1978.2 mg, 46% yield).

### General procedure C (GPC)<sup>[3]</sup>

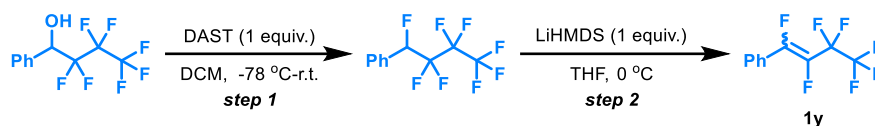

#### Step 1:

According to Burton's reported method, a solution of 2,2,3,3,4,4,4-heptafluoro-1-phenylbutan-1-ol (1381 mg, 5 mmol, 1 equiv.) in dichloromethane (15 mL) was stirred at -78 °C under N<sub>2</sub>. Then, diethylaminosulfur trifluoride (806.0 mg, 5 mmol, 1 equiv., DAST) was added while keeping the temperature around -70 °C. The reaction mixture was allowed to warm to room temperature and stirred for 15 h. The reaction was then quenched by saturated NH<sub>4</sub>Cl solution (50 mL) and extracted with Et<sub>2</sub>O (50 mL x 3). The organic layer was washed with saturated brine twice, dried over MgSO<sub>4</sub>, and concentrated under reduced pressure. The crude product was purified by flash silica gel column chromatography (300-400 mesh) using petroleum ether/ethyl acetate (200/1~100/1) as eluent to afford (1,2,2,3,3,4,4,4-octafluorobutyl)benzene in 72% yield (1002.5 mg).

#### Step 2:

A solution of (1,2,2,3,3,4,4,4-octafluorobutyl)benzene (834.4 mg, 3 mmol, 1 equiv.) in dry THF (6 mL) was stirred at 0 °C under N<sub>2</sub>. Then, LiHMDS (2.3 mL, 3 mmol, 1 equiv., 1.3 M in THF) was added while keeping the temperature around 0 °C. The reaction mixture was allowed to warm to room temperature and stirred for 15 h. The reaction was then quenched by saturated NH<sub>4</sub>Cl solution (50 mL) and extracted with Et<sub>2</sub>O (50 mL x 3). The organic layer was washed with saturated brine twice, dried over MgSO<sub>4</sub>, and concentrated under reduced pressure. The crude product was purified by flash silica gel column chromatography (300-400 mesh) using petroleum ether/ethyl acetate (200/1~100/1) as eluent to afford the product **1y** in 43% yield (333.0 mg).

### General procedure for the defluorinative synthesis of fluoroalkylated 1,5-diazapentadienes **2**

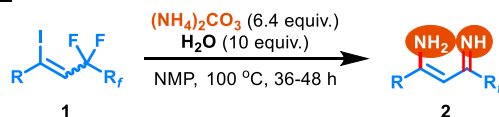

A solution of allylic fluoride **1** (0.3 mmol, 1 equiv.), (NH<sub>4</sub>)<sub>2</sub>CO<sub>3</sub> (184.5 mg, 1.92 mmol, 6.4 equiv.), and H<sub>2</sub>O (54.0 mg, 3 mmol, 10 equiv.) in NMP (4 mL) was stirred at 100 °C (oil bath) under air for 36-48 h. The reaction was then quenched by saturated NH<sub>4</sub>Cl solution (20 mL) and extracted with EtOAc (20 mL x 3). The organic layer was washed with saturated brine twice, dried over MgSO<sub>4</sub>, and concentrated under reduced pressure. The crude product was purified by flash silica gel column chromatography (300-400 mesh) using petroleum ether/ethyl acetate (200/1~2/1) as eluent to afford the pure product **2**.

## Scale-up synthesis of product 2a

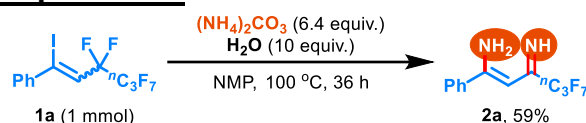

A solution of (3,3,4,4,5,5,6,6,6-nonafluoro-1-iodohex-1-en-1-yl)benzene (448.1 mg, 1 mmol, 1 equiv., **1a**),  $(\text{NH}_4)_2\text{CO}_3$  (615.0 mg, 6.4 mmol, 6.4 equiv.), and  $\text{H}_2\text{O}$  (180.0 mg, 10 mmol, 10 equiv.) in NMP (10 mL) was stirred at 100 °C (oil bath) under air for 36 h. The reaction was then quenched by saturated  $\text{NH}_4\text{Cl}$  solution (20 mL) and extracted with EtOAc (20 mL x 3). The organic layer was washed with saturated brine twice, dried over  $\text{MgSO}_4$ , and concentrated under reduced pressure. The crude product was purified by flash silica gel column chromatography (300-400 mesh) using petroleum ether/ethyl acetate (100/1) as eluent to afford the pure product **2a** (184.2 mg, 59% yield).

## Further transformations of product 2a

### a) Hydrolysis of product 2a

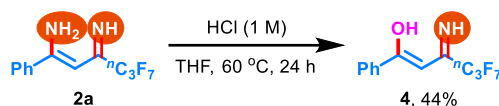

A solution of (Z)-4,4,5,5,6,6,6-heptafluoro-3-imino-1-phenylhex-1-en-1-amine (62.8 mg, 0.2 mmol, 1 equiv., **2a**) in HCl (1 M in water, 4 mL, 20 equiv.) and THF (2 mL) was stirred at 60 °C (oil bath) under air for 24 h. The reaction was then quenched by saturated  $\text{NH}_4\text{Cl}$  solution (20 mL) and extracted with EtOAc (20 mL x 3). The organic layer was washed with saturated brine twice, dried over  $\text{MgSO}_4$ , and concentrated under reduced pressure. The crude product was purified by flash silica gel column chromatography (300-400 mesh) using petroleum ether/ethyl acetate (10/1~4/1) as eluent to afford the pure product **4** (27.6 mg, 44% yield).

### b) The reaction of product 2a with hydroxylamine hydrochloride

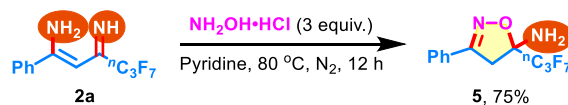

A solution of (Z)-4,4,5,5,6,6,6-heptafluoro-3-imino-1-phenylhex-1-en-1-amine (62.8 mg, 0.2 mmol, 1 equiv., **2a**) and hydroxylamine hydrochloride (41.7 mg, 0.6 mmol, 3 equiv.,  $\text{NH}_2\text{OH}\cdot\text{HCl}$ ) in pyridine (2 mL) was stirred at 80 °C (oil bath) under  $\text{N}_2$  for 12 h. The reaction was then quenched by saturated  $\text{NH}_4\text{Cl}$  solution (20 mL) and extracted with EtOAc (20 mL x 3). The organic layer was washed with saturated brine twice, dried over  $\text{MgSO}_4$ , and concentrated under reduced pressure. The crude product was purified by flash silica gel column chromatography (300-400 mesh) using petroleum ether/ethyl acetate (10/1~4/1) as eluent to afford the pure product **5** (49.4 mg, 75% yield).

### c) The reaction of product 2a with 4-bromobenzaldehyde

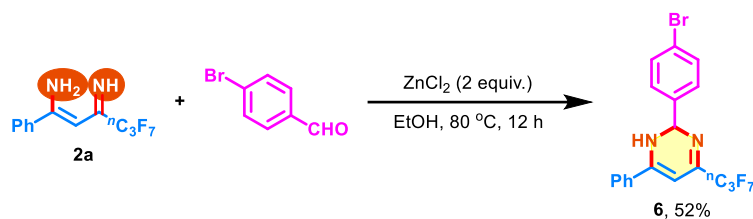

A solution of (Z)-4,4,5,5,6,6,6-heptafluoro-3-imino-1-phenylhex-1-en-1-amine (62.8 mg, 0.2 mmol, 1 equiv., **2a**), 4-bromobenzaldehyde (37.0 mg, 0.2 mmol, 1 equiv.), and ZnCl<sub>2</sub> (27.3 mg, 0.2 mmol, 1 equiv.) in EtOH (2 mL) was stirred at 80 °C (oil bath) under air for 12 h. The reaction was then quenched by saturated NH<sub>4</sub>Cl solution (20 mL) and extracted with EtOAc (20 mL x 3). The organic layer was washed with saturated brine twice, dried over MgSO<sub>4</sub>, and concentrated under reduced pressure. The crude product was purified by flash silica gel column chromatography (300-400 mesh) using petroleum ether/ethyl acetate (10/1~4/1) as eluent to afford the pure product **6** (49.7 mg, 52% yield).

#### d) The reaction of product 2a with acetyl chloride

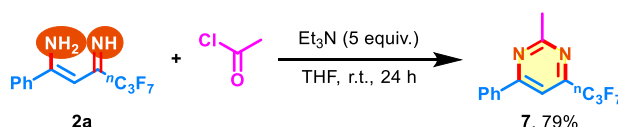

A solution of (Z)-4,4,5,5,6,6,6-heptafluoro-3-imino-1-phenylhex-1-en-1-amine (62.8 mg, 0.2 mmol, 1 equiv., **2a**), acetyl chloride (69.0 mg, 0.88 mmol, 4.4 equiv.), and Et<sub>3</sub>N (101.2 mg, 1 mmol, 5 equiv.) in THF (2 mL) was stirred at room temperature under air for 24 h. The reaction was then quenched by saturated NH<sub>4</sub>Cl solution (20 mL) and extracted with EtOAc (20 mL x 3). The organic layer was washed with saturated brine twice, dried over MgSO<sub>4</sub>, and concentrated under reduced pressure. The crude product was purified by flash silica gel column chromatography (300-400 mesh) using petroleum ether/ethyl acetate (100/1~80/1) as eluent to afford the pure product **7** (53.6 mg, 79% yield).

### Mechanistic studies

#### a) The reactivity of perfluoroalkylated alkene **8**

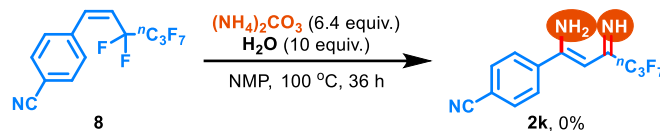

A solution of (Z)-4-(3,3,4,4,5,5,6,6,6-nonafluorohex-1-en-1-yl)benzotrile (69.4 mg, 0.2 mmol, 1 equiv., **8**), (NH<sub>4</sub>)<sub>2</sub>CO<sub>3</sub> (123.0 mg, 1.28 mmol, 6.4 equiv.), and H<sub>2</sub>O (36.0 mg, 2 mmol, 10 equiv.) in NMP (4 mL) was stirred at 100 °C (oil bath) under air for 36 h. No desired product **2k** was detected.

**The necessity of an iodine atom at the α-position of the fluoroalkyl alkene demonstrated that the initial reaction might go through a C-I bond displacement.**

#### b) The use of TsNH<sub>2</sub> (**9**) as a N-source

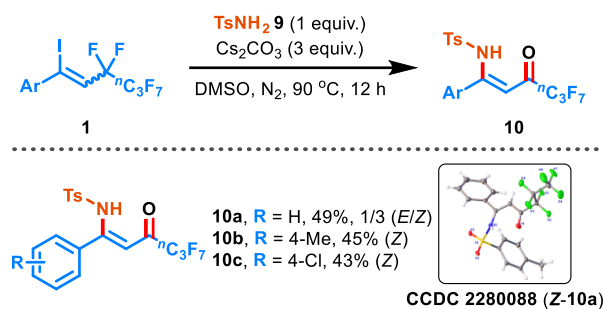

A solution of allylic fluoride **1** (0.45 mmol, 1.5 equiv.), TsNH<sub>2</sub> (51.4 mg, 0.3 mmol, 1 equiv., **9**), and Cs<sub>2</sub>CO<sub>3</sub> (293.2 mg, 0.9 mmol, 3 equiv.) in DMSO (2 mL) was stirred at 90 °C (oil bath) under N<sub>2</sub> for 12 h. The reaction was then quenched by saturated NH<sub>4</sub>Cl solution (20 mL) and extracted with EtOAc (20 mL x 3). The organic layer was washed with saturated brine twice, dried over MgSO<sub>4</sub>, and concentrated under reduced pressure. The crude product was purified by flash silica gel column chromatography (300-400 mesh) using petroleum ether/ethyl acetate (10/1) as eluent to afford the pure products **10a-c** in 43-49% yields.

**These results suggested that 1) deiodinative amination takes place first; 2) H<sub>2</sub>O is involved in the C(sp<sup>3</sup>)-F bond breaking step as a reagent and/or promoter, not merely for increasing the solubility of (NH<sub>4</sub>)<sub>2</sub>CO<sub>3</sub> in NMP; 3) the further condensation of the resulting enaminoketone with TsNH<sub>2</sub> is difficult to occur under basic conditions.**

#### c) The reaction of **10a** with (NH<sub>4</sub>)<sub>2</sub>CO<sub>3</sub>

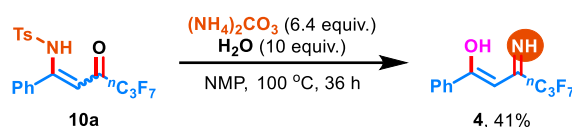

A solution of **10a** (93.9 mg, 0.2 mmol, 1 equiv.), (NH<sub>4</sub>)<sub>2</sub>CO<sub>3</sub> (123.0 mg, 1.28 mmol, 6.4 equiv.), and H<sub>2</sub>O (36.1 mg, 2 mmol, 10 equiv.) in NMP (4 mL) was stirred at 100 °C (oil bath) under air for 36 h. The reaction was then quenched by saturated NH<sub>4</sub>Cl solution (20 mL) and extracted with EtOAc (20 mL x 3). The organic layer was washed with saturated brine twice, dried over MgSO<sub>4</sub>, and concentrated under reduced pressure. The crude product was purified by flash silica gel column chromatography (300-400 mesh) using petroleum ether/ethyl acetate (4/1) as eluent to afford the pure product **4** (26.1 mg, 41% yield).

**This result suggested that the further condensation of the enaminoketone **10a** with (NH<sub>4</sub>)<sub>2</sub>CO<sub>3</sub> is much easier than TsNH<sub>2</sub>.**

#### d) The use of piperidine (**11**) as a N-source

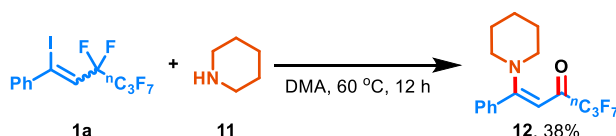

A solution of (3,3,4,4,5,5,6,6,6-nonafluoro-1-iodohex-1-en-1-yl)benzene (134.4 mg, 0.3 mmol, 1 equiv., **1a**) and piperidine (127.7 mg, 1.5 mmol, 5 equiv., **11**) in DMA (2 mL) was stirred at 60 °C

(oil bath) under air for 12 h. The reaction was then quenched by saturated  $\text{NH}_4\text{Cl}$  solution (20 mL) and extracted with EtOAc (20 mL x 3). The organic layer was washed with saturated brine twice, dried over  $\text{MgSO}_4$ , and concentrated under reduced pressure. The crude product was purified by flash silica gel column chromatography (300-400 mesh) using petroleum ether/ethyl acetate (10/1~4/1) as eluent to afford the pure product **12** (43.6 mg, 38% yield).

**These results suggested that 1) deiodinative amination takes place first; 2)  $\text{H}_2\text{O}$  is involved in the  $\text{C}(\text{sp}^3)\text{-F}$  bond breaking step as a reagent and/or promoter, not merely for increasing the solubility of  $(\text{NH}_4)_2\text{CO}_3$  in NMP; 3) the further condensation of the resulting enaminoketone with the piperidine is difficult to occur under basic conditions.**

#### e) The use of aniline (**13**) as a *N*-source

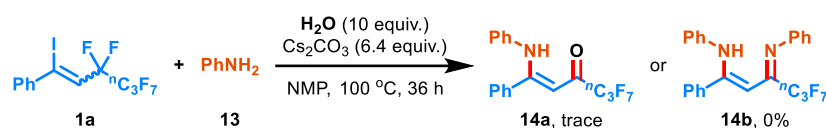

A solution of (3,3,4,4,5,5,6,6-nonafluoro-1-iodohex-1-en-1-yl)benzene (134.4 mg, 0.3 mmol, 1 equiv., **1a**), aniline (178.8 mg, 1.92 mmol, 6.4 equiv., **13**),  $\text{Cs}_2\text{CO}_3$  (625.6 mg, 1.92 mmol, 6.4 equiv.), and  $\text{H}_2\text{O}$  (54.0 mg, 3 mmol, 10 equiv.) in NMP (4 mL) was stirred at 100 °C (oil bath) under air for 36 h. A trace amount of product **14a** was formed and no desired product **14b** was obtained.

**This result suggested that aniline (**13**) is not a suitable candidate for the present defluoroamination.**

#### f) The use of diamine compounds **15** as dual *N*-sources

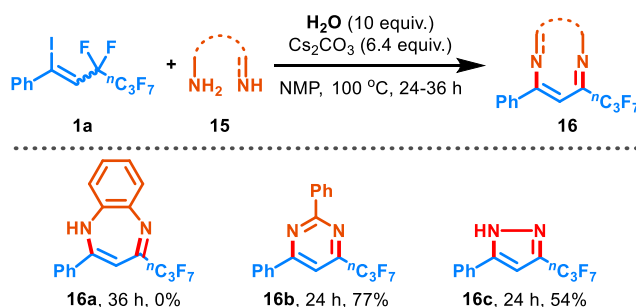

A solution of (3,3,4,4,5,5,6,6-nonafluoro-1-iodohex-1-en-1-yl)benzene (62.8 mg, 0.3 mmol, 1 equiv., **1a**), diamine compound (1.92 mmol, 6.4 equiv., **15a-c**),  $\text{Cs}_2\text{CO}_3$  (625.6 mg, 1.92 mmol, 6.4 equiv.), and  $\text{H}_2\text{O}$  (54.0 mg, 3 mmol, 10 equiv.) in NMP (4 mL) was stirred at 100 °C (oil bath) under air for 24-36 h. The reaction was then quenched by saturated  $\text{NH}_4\text{Cl}$  solution (20 mL) and extracted with EtOAc (20 mL x 3). The organic layer was washed with saturated brine twice, dried over  $\text{MgSO}_4$ , and concentrated under reduced pressure. The crude product was purified by flash silica gel column chromatography (300-400 mesh) using petroleum ether/ethyl acetate (200/1~2/1) as eluent to afford the pure product **16b** (92.6 mg, 77% yield) or **16c** (50.8 mg, 54% yield). No desired product **16a** was detected.

**This result suggested that the nucleophilicity of the *N*-source is a key factor for the success of the defluorinative transformation.**

### g) Detection of possible intermediate C

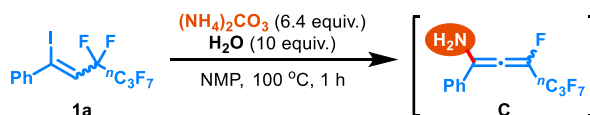

A solution of (3,3,4,4,5,5,6,6,6-nonafluoro-1-iodohex-1-en-1-yl)benzene (134.4 mg, 0.3 mmol, 1 equiv., **1a**), (NH<sub>4</sub>)<sub>2</sub>CO<sub>3</sub> (184.5 mg, 1.92 mmol, 6.4 equiv.), and H<sub>2</sub>O (54.0 mg, 3 mmol, 10 equiv.) in NMP (4 mL) was stirred at 100 °C (oil bath) under air for 1 h. Then the vial was cooled to room temperature and the reaction mixture was passed through a short pad of Celite followed by rinse with MeCN. A sample was taken from the filtrate and was directly analyzed by HRMS.

**HRMS analysis of the reaction mixture suggested the involvement of allenylic intermediate C.**

#### Elemental Composition Report

##### Single Mass Analysis

Tolerance = 5.0 mDa / DBE: min = -1.5, max = 50.0

Element prediction: Off

Number of isotope peaks used for i-FIT = 3

Monoisotopic Mass, Odd and Even Electron Ions

2 formula(e) evaluated with 1 results within limits (up to 50 best isotopic matches for each mass)

Elements Used:

C: 11-13 H: 7-9 N: 0-2 F: 7-9

HW7 228 (1.646)

1: TOF MS ES+

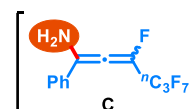

Page 1

C<sub>12</sub>H<sub>8</sub>F<sub>8</sub>N<sup>+</sup> [M+H]<sup>+</sup>  
Exact Mass: 318.0524  
Found: 318.0526

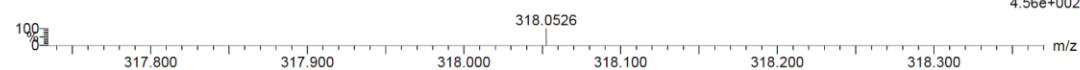

Minimum: -1.5  
Maximum: 50.0

| Mass     | Calc. Mass | mDa  | PPM  | DBE | i-FIT | Norm | Conf (%) | Formula     |
|----------|------------|------|------|-----|-------|------|----------|-------------|
| 318.0526 | 318.0529   | -0.3 | -0.9 | 5.5 | 21.0  | n/a  | n/a      | C12 H8 N F8 |

### h) Detection of possible intermediate F

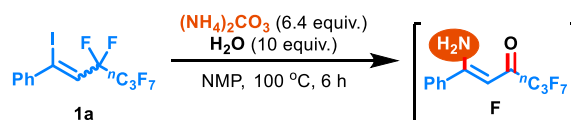

A solution of (3,3,4,4,5,5,6,6,6-nonafluoro-1-iodohex-1-en-1-yl)benzene (134.4 mg, 0.3 mmol, 1 equiv., **1a**), (NH<sub>4</sub>)<sub>2</sub>CO<sub>3</sub> (184.5 mg, 1.92 mmol, 6.4 equiv.), and H<sub>2</sub>O (54.0 mg, 3 mmol, 10 equiv.) in NMP (4 mL) was stirred at 100 °C (oil bath) under air for 6 h. Then the vial was cooled to room temperature and the reaction mixture was passed through a short pad of Celite followed by rinse with MeCN. A sample was taken from the filtrate and was directly analyzed by HRMS.

**HRMS analysis of the reaction mixture suggested the involvement of aminovinyl ketone F.**



## Elemental Composition Report

### Single Mass Analysis

Tolerance = 5.0 mDa / DBE: min = -1.5, max = 50.0

Element prediction: Off

Number of isotope peaks used for i-FIT = 3

Monoisotopic Mass, Even Electron Ions

107 formula(e) evaluated with 1 results within limits (up to 50 best isotopic matches for each mass)

Elements Used:

C: 11-13 H: 8-10 N: 1-3 O: 0-3 F: 7-11 K: 0-1

740.58 (0.433)

1: TOF MS ES+

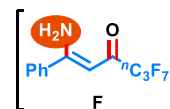

Page 1

Calcd for C<sub>12</sub>H<sub>9</sub>F<sub>7</sub>NO<sup>+</sup> [M+H]<sup>+</sup>

Exact Mass: 316.0567

Found: 316.0566

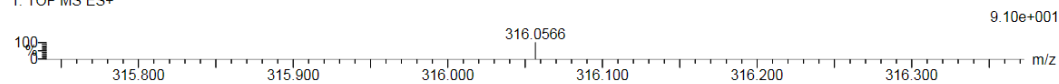

Minimum: -1.5  
Maximum: 50.0

| Mass     | Calc. Mass | mDa  | PPM  | DBE | i-FIT | Norm | Conf (%) | Formula       |
|----------|------------|------|------|-----|-------|------|----------|---------------|
| 316.0566 | 316.0572   | -0.6 | -1.9 | 5.5 | 16.3  | n/a  | n/a      | C12 H9 N O F7 |

### i) The reaction of perfluorobutyl alkyne **1a'** with (NH<sub>4</sub>)<sub>2</sub>CO<sub>3</sub>

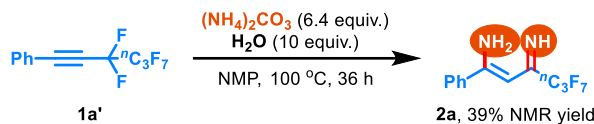

A solution of (perfluorohex-1-yn-1-yl)benzene (96.1 mg, 0.3 mmol, 1 equiv., **1a'**), (NH<sub>4</sub>)<sub>2</sub>CO<sub>3</sub> (184.5 mg, 1.92 mmol, 6.4 equiv.), and H<sub>2</sub>O (54.0 mg, 3 mmol, 10 equiv.) in NMP (4 mL) was stirred at 100 °C (oil bath) under air for 36 h. The yield of **2a** was determined by <sup>19</sup>F NMR analysis with 1-fluoro-4-methoxybenzene (0.1 mmol) as an internal standard.

## Optimization of the reaction conditions

Table S1. Optimization of the reaction conditions<sup>a</sup>

$\text{Ph}-\text{C}(\text{I})=\text{C}(\text{F}_2)-\text{C}_6\text{F}_5 + \text{N} \xrightarrow[\text{- 1, 2 F}]{\text{H}_2\text{O (y equiv.)}, \text{sol.}, \text{temp.}, \text{time}}$ 
 $\text{Ph}-\text{C}(\text{NH}_2)=\text{C}(\text{F}_2)-\text{C}_6\text{F}_5$

**1a** (x equiv.)  **2a**

| Entry     | N-source<br>(x equiv.)                                               | H <sub>2</sub> O<br>(y equiv.) | Solvent     | Temp.<br>(°C) | Time (h)  | Yield of<br><b>1a</b> (%) <sup>b</sup> | Yield of<br><b>2a</b> (%) <sup>b</sup> |
|-----------|----------------------------------------------------------------------|--------------------------------|-------------|---------------|-----------|----------------------------------------|----------------------------------------|
| 1         | (NH <sub>4</sub> ) <sub>2</sub> CO <sub>3</sub> (6.4)                | 5                              | DMA         | 70            | 12        | 68                                     | 11                                     |
| 2         | (NH <sub>4</sub> ) <sub>2</sub> CO <sub>3</sub> (6.4)                | 5                              | DMA         | 90            | 12        | 37                                     | 33                                     |
| 3         | (NH <sub>4</sub> ) <sub>2</sub> CO <sub>3</sub> (6.4)                | 5                              | DMA         | 100           | 12        | 38                                     | 35                                     |
| 4         | (NH <sub>4</sub> ) <sub>2</sub> CO <sub>3</sub> (6.4)                | 5                              | DMA         | 100           | 24        | 18                                     | 48                                     |
| 5         | (NH <sub>4</sub> ) <sub>2</sub> CO <sub>3</sub> (6.4)                | 5                              | DMSO        | 100           | 24        | 0                                      | 33                                     |
| 6         | (NH <sub>4</sub> ) <sub>2</sub> CO <sub>3</sub> (6.4)                | 5                              | DMF         | 100           | 24        | 25                                     | 8                                      |
| 7         | (NH <sub>4</sub> ) <sub>2</sub> CO <sub>3</sub> (6.4)                | 5                              | NMP         | 100           | 24        | 10                                     | 66                                     |
| 6         | (NH <sub>4</sub> ) <sub>2</sub> CO <sub>3</sub> (6.4)                | 5                              | Toluene     | 100           | 24        | 0                                      | 0                                      |
| 7         | (NH <sub>4</sub> ) <sub>2</sub> CO <sub>3</sub> (6.4)                | 5                              | 1,4-dioxane | 100           | 24        | 0                                      | 0                                      |
| 8         | (NH <sub>4</sub> ) <sub>2</sub> CO <sub>3</sub> (6.4)                | 5                              | MeCN        | 80            | 24        | 0                                      | 0                                      |
| 9         | (NH <sub>4</sub> ) <sub>2</sub> CO <sub>3</sub> (6.4)                | 5                              | tBuOH       | 85            | 24        | 0                                      | 0                                      |
| 10        | (NH <sub>4</sub> ) <sub>2</sub> CO <sub>3</sub> (6.4)                | 5                              | EtOAc       | 80            | 24        | 0                                      | 0                                      |
| 11        | (NH <sub>4</sub> ) <sub>2</sub> CO <sub>3</sub> (6.4)                | 0                              | NMP         | 100           | 24        | 23                                     | 44                                     |
| 12        | (NH <sub>4</sub> ) <sub>2</sub> CO <sub>3</sub> (6.4)                | 5                              | NMP         | 80            | 24        | 27                                     | 49                                     |
| 13        | (NH <sub>4</sub> ) <sub>2</sub> CO <sub>3</sub> (6.4)                | 5                              | NMP         | 120           | 24        | 0                                      | 54                                     |
| 14        | (NH <sub>4</sub> ) <sub>2</sub> CO <sub>3</sub> (6.4)                | 8                              | NMP         | 100           | 24        | 11                                     | 67                                     |
| 15        | (NH <sub>4</sub> ) <sub>2</sub> CO <sub>3</sub> (6.4)                | 10                             | NMP         | 100           | 24        | 10                                     | 71 (55) <sup>c</sup>                   |
| 16        | (NH <sub>4</sub> ) <sub>2</sub> CO <sub>3</sub> (6.4)                | 15                             | NMP         | 100           | 24        | 9                                      | 62                                     |
| 17        | (NH <sub>4</sub> ) <sub>2</sub> CO <sub>3</sub> (6.4)                | 20                             | NMP         | 100           | 24        | 10                                     | 63                                     |
| 18        | (NH <sub>4</sub> ) <sub>2</sub> CO <sub>3</sub> (4.4)                | 10                             | NMP         | 100           | 24        | 5                                      | 45                                     |
| 19        | (NH <sub>4</sub> ) <sub>2</sub> CO <sub>3</sub> (2.4)                | 10                             | NMP         | 100           | 24        | 11                                     | 34                                     |
| 20        | NH <sub>3</sub> (aq. 6.4) +<br>Cs <sub>2</sub> CO <sub>3</sub> (6.4) | 10                             | NMP         | 100           | 24        | trace                                  | trace                                  |
| 21        | NH <sub>4</sub> OAc (6.4) +<br>Cs <sub>2</sub> CO <sub>3</sub> (6.4) | 10                             | NMP         | 100           | 24        | trace                                  | trace                                  |
| 22        | NH <sub>4</sub> Cl (6.4) + Cs <sub>2</sub> CO <sub>3</sub><br>(6.4)  | 10                             | NMP         | 100           | 24        | trace                                  | 26                                     |
| 23        | (NH <sub>4</sub> ) <sub>2</sub> CO <sub>3</sub> (6.4)                | 10                             | NMP         | 100           | 24        | 17 <sup>d,e</sup>                      | 32 <sup>d,e</sup>                      |
| 24        | (NH <sub>4</sub> ) <sub>2</sub> CO <sub>3</sub> (6.4)                | 10                             | NMP         | 100           | 24        | 12 <sup>f</sup>                        | 74 <sup>f</sup>                        |
| 25        | (NH <sub>4</sub> ) <sub>2</sub> CO <sub>3</sub> (6.4)                | 10                             | NMP         | 100           | 24        | 13 <sup>g</sup>                        | 79 <sup>g</sup> (64) <sup>c</sup>      |
| <b>26</b> | <b>(NH<sub>4</sub>)<sub>2</sub>CO<sub>3</sub> (6.4)</b>              | <b>10</b>                      | <b>NMP</b>  | <b>100</b>    | <b>36</b> | <b>7<sup>g</sup></b>                   | <b>91<sup>g</sup> (82)<sup>c</sup></b> |
| 27        | --                                                                   | 10                             | NMP         | 100           | 36        | 83 <sup>g</sup>                        | 0                                      |

<sup>a</sup> Reaction conditions: **1a** (0.3 mmol), *N* source (0.72-1.92 mmol), and H<sub>2</sub>O (0-20 mmol) in solvent (1-4 mL) at 70-120 °C under air for 12-36 h. <sup>b</sup> Yields were determined by <sup>19</sup>F NMR analysis with 1-fluoro-4-methoxybenzene (0.1 mmol) as an internal standard. <sup>c</sup> Isolated yield. <sup>d</sup> Under N<sub>2</sub>. <sup>e</sup> In 1 mL of NMP. <sup>f</sup> In 3 mL of NMP. <sup>g</sup> In 4 mL of NMP.

## The X-ray crystal structures of products 2k and Z-10a

The single crystals were grown from the mixed solution of EtOAc/EtOH/H<sub>2</sub>O by slowly evaporating the above solvents at room temperature.

**(Z)-4-(1-Amino-4,4,5,5,6,6,6-heptafluoro-3-iminohex-1-en-1-yl)benzonitrile** (2k;  
displacement ellipsoids are drawn at the 50% probability levels):

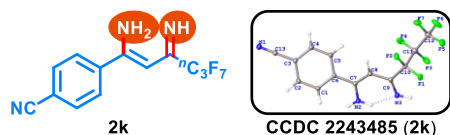

CCDC number: 2243485

**Table S2.** Crystal data and structure refinement for **2k**.

|                                             |                                                               |
|---------------------------------------------|---------------------------------------------------------------|
| Identification code                         | <b>2k</b>                                                     |
| Empirical formula                           | C <sub>13</sub> H <sub>8</sub> F <sub>7</sub> N <sub>3</sub>  |
| Formula weight                              | 339.22                                                        |
| Temperature/K                               | 199.99(10)                                                    |
| Crystal system                              | monoclinic                                                    |
| Space group                                 | P2 <sub>1</sub> /c                                            |
| a/Å                                         | 11.5372(11)                                                   |
| b/Å                                         | 11.7335(9)                                                    |
| c/Å                                         | 10.3893(9)                                                    |
| α/°                                         | 90                                                            |
| β/°                                         | 104.132(9)                                                    |
| γ/°                                         | 90                                                            |
| Volume/Å <sup>3</sup>                       | 1363.9(2)                                                     |
| Z                                           | 4                                                             |
| ρ <sub>calc</sub> /cm <sup>3</sup>          | 1.652                                                         |
| μ/mm <sup>-1</sup>                          | 0.168                                                         |
| F(000)                                      | 680.0                                                         |
| Crystal size/mm <sup>3</sup>                | 0.14 × 0.12 × 0.11                                            |
| Radiation                                   | Mo Kα (λ = 0.71073)                                           |
| 2θ range for data collection/°              | 5.03 to 49.998                                                |
| Index ranges                                | -13 ≤ h ≤ 13, -11 ≤ k ≤ 13, -12 ≤ l ≤ 10                      |
| Reflections collected                       | 5493                                                          |
| Independent reflections                     | 2399 [R <sub>int</sub> = 0.0239, R <sub>sigma</sub> = 0.0324] |
| Data/restraints/parameters                  | 2399/0/221                                                    |
| Goodness-of-fit on F <sup>2</sup>           | 1.069                                                         |
| Final R indexes [I ≥ 2σ (I)]                | R <sub>1</sub> = 0.0395, wR <sub>2</sub> = 0.0986             |
| Final R indexes [all data]                  | R <sub>1</sub> = 0.0479, wR <sub>2</sub> = 0.1047             |
| Largest diff. peak/hole / e Å <sup>-3</sup> | 0.19/-0.28                                                    |

### Crystal structure determination of [2k]

**Crystal Data** for  $C_{13}H_8F_7N_3$  ( $M = 339.22$  g/mol): monoclinic, space group  $P2_1/c$  (no. 14),  $a = 11.5372(11)$  Å,  $b = 11.7335(9)$  Å,  $c = 10.3893(9)$  Å,  $\beta = 104.132(9)^\circ$ ,  $V = 1363.9(2)$  Å<sup>3</sup>,  $Z = 4$ ,  $T = 199.99(10)$  K,  $\mu(\text{Mo K}\alpha) = 0.168$  mm<sup>-1</sup>,  $D_{\text{calc}} = 1.652$  g/cm<sup>3</sup>, 5493 reflections measured ( $5.03^\circ \leq 2\theta \leq 49.998^\circ$ ), 2399 unique ( $R_{\text{int}} = 0.0239$ ,  $R_{\text{sigma}} = 0.0324$ ) which were used in all calculations. The final  $R_1$  was 0.0395 ( $I > 2\sigma(I)$ ) and  $wR_2$  was 0.1047 (all data).

**(Z)-N-(4,4,5,5,6,6,6-Heptafluoro-3-oxo-1-phenylhex-1-en-1-yl)-4-methylbenzenesulfonamide (Z-10a; displacement ellipsoids are drawn at the 50% probability levels):**

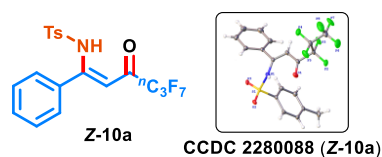

**CCDC number:** 2280088

**Table S3.** Crystal data and structure refinement for **Z-10a**.

|                                               |                                                                  |
|-----------------------------------------------|------------------------------------------------------------------|
| Identification code                           | <b>Z-10a</b>                                                     |
| Empirical formula                             | $C_{19}H_{14}F_7NO_3S$                                           |
| Formula weight                                | 469.37                                                           |
| Temperature/K                                 | 150.00(10)                                                       |
| Crystal system                                | triclinic                                                        |
| Space group                                   | P-1                                                              |
| $a/\text{\AA}$                                | 6.2755(10)                                                       |
| $b/\text{\AA}$                                | 8.1410(9)                                                        |
| $c/\text{\AA}$                                | 19.0094(12)                                                      |
| $\alpha/^\circ$                               | 81.051(7)                                                        |
| $\beta/^\circ$                                | 85.123(9)                                                        |
| $\gamma/^\circ$                               | 84.276(11)                                                       |
| Volume/Å <sup>3</sup>                         | 952.2(2)                                                         |
| Z                                             | 2                                                                |
| $\rho_{\text{calc}}/\text{g/cm}^3$            | 1.637                                                            |
| $\mu/\text{mm}^{-1}$                          | 2.365                                                            |
| F(000)                                        | 476.0                                                            |
| Crystal size/mm <sup>3</sup>                  | 0.16 × 0.13 × 0.11                                               |
| Radiation                                     | Cu K $\alpha$ ( $\lambda = 1.54184$ )                            |
| $2\theta$ range for data collection/ $^\circ$ | 4.718 to 133.198                                                 |
| Index ranges                                  | $-7 \leq h \leq 7$ , $-9 \leq k \leq 9$ , $-22 \leq l \leq 14$   |
| Reflections collected                         | 5808                                                             |
| Independent reflections                       | 3370 [ $R_{\text{int}} = 0.0882$ , $R_{\text{sigma}} = 0.0801$ ] |
| Data/restraints/parameters                    | 3370/0/281                                                       |

Goodness-of-fit on  $F^2$  1.087  
Final R indexes [ $I \geq 2\sigma(I)$ ]  $R_1 = 0.0955$ ,  $wR_2 = 0.2680$   
Final R indexes [all data]  $R_1 = 0.1060$ ,  $wR_2 = 0.2865$   
Largest diff. peak/hole /  $e \text{ \AA}^{-3}$  0.91/-1.19

### Crystal structure determination of [Z-10a]

**Crystal Data** for  $C_{19}H_{14}F_7NO_3S$  ( $M = 469.37$  g/mol): triclinic, space group P-1 (no. 2),  $a = 6.2755(10)$   $\text{\AA}$ ,  $b = 8.1410(9)$   $\text{\AA}$ ,  $c = 19.0094(12)$   $\text{\AA}$ ,  $\alpha = 81.051(7)^\circ$ ,  $\beta = 85.123(9)^\circ$ ,  $\gamma = 84.276(11)^\circ$ ,  $V = 952.2(2)$   $\text{\AA}^3$ ,  $Z = 2$ ,  $T = 150.00(10)$  K,  $\mu(\text{Cu K}\alpha) = 2.365$   $\text{mm}^{-1}$ ,  $D_{\text{calc}} = 1.637$   $\text{g/cm}^3$ , 5808 reflections measured ( $4.718^\circ \leq 2\Theta \leq 133.198^\circ$ ), 3370 unique ( $R_{\text{int}} = 0.0882$ ,  $R_{\text{sigma}} = 0.0801$ ) which were used in all calculations. The final  $R_1$  was 0.0955 ( $I > 2\sigma(I)$ ) and  $wR_2$  was 0.2865 (all data).

### Characterization data for products

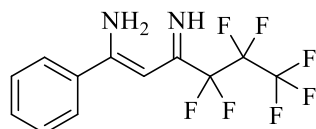

#### (Z)-4,4,5,5,6,6,6-Heptafluoro-3-imino-1-phenylhex-1-en-1-amine (2a):

Yield = 82% (77.0 mg). Green oil.

Purified by flash silica gel column chromatography through silica gel (petroleum ether/ethyl acetate, 100/1).

**$^1\text{H NMR}$  (400 MHz,  $\text{CDCl}_3$ ):**  $\delta = 9.56$  (brs, 2H), 7.61–7.53 (m, 2H), 7.50–7.42 (m, 3H), 5.84 (brs, 1H), 5.33 (s, 1H) ppm.

**$^{19}\text{F NMR}$  (376 MHz,  $\text{CDCl}_3$ ):**  $\delta = -80.32$  (t,  $J = 9.4$  Hz, 3F),  $-120.07$  (q,  $J = 9.7$  Hz, 2F),  $-126.48$  (s, 2F) ppm.

**$^{13}\text{C NMR}$  (100 MHz,  $\text{CDCl}_3$ ):**  $\delta = 160.8$ , 160.7 (t,  $J_{\text{C-F}} = 22.9$  Hz), 138.2, 130.5, 129.1, 126.3, 87.8 ppm, carbons corresponding to the  $\text{C}_3\text{F}_7$  group cannot be identified due to C-F coupling.

**HRMS (m/z):** calcd for  $\text{C}_{12}\text{H}_{10}\text{F}_7\text{N}_2$   $[\text{M}+\text{H}]^+$  315.0727, found: 315.0721.

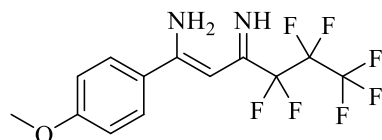

#### (Z)-4,4,5,5,6,6,6-Heptafluoro-3-imino-1-(4-methoxyphenyl)hex-1-en-1-amine (2b):

Yield = 69% (71.1 mg). Green oil.

Purified by flash silica gel column chromatography through silica gel (petroleum ether/ethyl acetate, 100/1).

**$^1\text{H NMR}$  (400 MHz,  $\text{CDCl}_3$ ):**  $\delta = 9.51$  (brs, 2H), 7.60–7.45 (m, 2H), 7.08–6.87 (m, 2H), 5.81 (brs, 1H), 5.29 (s, 1H), 3.85 (s, 3H) ppm.

**$^{19}\text{F NMR}$  (376 MHz,  $\text{CDCl}_3$ ):**  $\delta = -80.33$  (t,  $J = 9.7$  Hz, 3F),  $-120.01$  (q,  $J = 8.9$  Hz, 2F),  $-126.49$  (s, 2F) ppm.

**<sup>13</sup>C NMR (100 MHz, CDCl<sub>3</sub>):**  $\delta$  = 161.4, 160.7 (t,  $J_{C-F}$  = 23.2 Hz), 160.4, 130.4, 127.7, 114.4, 87.1, 55.5 ppm, carbons corresponding to the C<sub>3</sub>F<sub>7</sub> group cannot be identified due to C-F coupling.  
**HRMS (m/z):** calcd for C<sub>13</sub>H<sub>12</sub>F<sub>7</sub>N<sub>2</sub>O [M+H]<sup>+</sup> 345.0832, found: 345.0825.

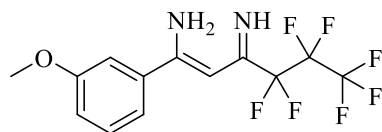

**(Z)-4,4,5,5,6,6,6-Heptafluoro-3-imino-1-(3-methoxyphenyl)hex-1-en-1-amine (2c):**

Yield = 69% (71.3 mg). Green oil.

Purified by flash silica gel column chromatography through silica gel (petroleum ether/ethyl acetate, 100/1).

**<sup>1</sup>H NMR (400 MHz, CDCl<sub>3</sub>):**  $\delta$  = 9.42 (brs, 2H), 7.36 (t,  $J$  = 7.9 Hz, 1H), 7.15 (ddd,  $J$  = 7.7, 1.8, 1.0 Hz, 1H), 7.09–7.07 (m, 1H), 7.00 (ddd,  $J$  = 8.2, 2.6, 1.0 Hz, 1H), 5.86 (brs, 1H), 5.33 (s, 1H), 3.86 (s, 3H) ppm.

**<sup>19</sup>F NMR (376 MHz, CDCl<sub>3</sub>):**  $\delta$  = -80.34 (t,  $J$  = 9.7 Hz, 3F), -120.09 (q,  $J$  = 9.3 Hz, 2F), -126.49 (s, 2F) ppm.

**<sup>13</sup>C NMR (100 MHz, CDCl<sub>3</sub>):**  $\delta$  = 160.7 (t,  $J_{C-F}$  = 24.3 Hz), 160.4, 160.0, 139.7, 130.2, 118.6, 115.6, 112.1, 87.8, 55.5 ppm, carbons corresponding to the C<sub>3</sub>F<sub>7</sub> group cannot be identified due to C-F coupling.

**HRMS (m/z):** calcd for C<sub>13</sub>H<sub>12</sub>F<sub>7</sub>N<sub>2</sub>O [M+H]<sup>+</sup> 345.0832, found: 345.0831.

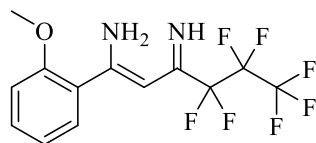

**(Z)-4,4,5,5,6,6,6-Heptafluoro-3-imino-1-(2-methoxyphenyl)hex-1-en-1-amine (2d):**

Yield = 27% (27.9 mg, 36 h); 29% (30.2 mg, 48 h). Green oil.

Purified by flash silica gel column chromatography through silica gel (petroleum ether/ethyl acetate, 100/1).

**<sup>1</sup>H NMR (400 MHz, CDCl<sub>3</sub>):**  $\delta$  = 9.46 (brs, 2H), 7.50–7.36 (m, 2H), 7.08–6.95 (m, 2H), 6.61 (brs, 1H), 5.24 (s, 1H), 3.88 (s, 3H) ppm.

**<sup>19</sup>F NMR (376 MHz, CDCl<sub>3</sub>):**  $\delta$  = -80.32 (t,  $J$  = 9.7 Hz, 3F), -119.98 (q,  $J$  = 10.4 Hz, 2F), -126.50 (s, 2F) ppm.

**<sup>13</sup>C NMR (100 MHz, CDCl<sub>3</sub>):**  $\delta$  = 160.1, 159.9 (t,  $J_{C-F}$  = 22.2 Hz), 156.8, 131.3, 129.6, 126.3, 121.2, 111.7, 89.2, 55.8 ppm, carbons corresponding to the C<sub>3</sub>F<sub>7</sub> group cannot be identified due to C-F coupling.

**HRMS (m/z):** calcd for C<sub>13</sub>H<sub>12</sub>F<sub>7</sub>N<sub>2</sub>O [M+H]<sup>+</sup> 345.0832, found: 345.0829.

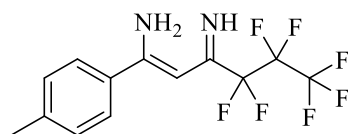

**(Z)-4,4,5,5,6,6,6-Heptafluoro-3-imino-1-(p-tolyl)hex-1-en-1-amine (2e):**

Yield = 34% (33.9 mg, 36 h); 64% (62.7 mg, 48 h). Yellow oil.

Purified by flash silica gel column chromatography through silica gel (petroleum ether/ethyl acetate, 100/1).

**<sup>1</sup>H NMR (400 MHz, CDCl<sub>3</sub>):**  $\delta$  = 9.49 (brs, 2H), 7.49–7.44 (m, 2H), 7.28–7.23 (m, 2H), 5.82 (brs, 1H), 5.31 (s, 1H), 2.41 (s, 3H) ppm.

**<sup>19</sup>F NMR (376 MHz, CDCl<sub>3</sub>):**  $\delta$  = -80.31 (t,  $J$  = 9.7 Hz, 3F), -120.03 (q,  $J$  = 10.4 Hz, 2F), -126.47 (s, 2F) ppm.

**<sup>13</sup>C NMR (100 MHz, CDCl<sub>3</sub>):**  $\delta$  = 160.8 (t,  $J_{C-F}$  = 23.2 Hz), 160.7, 140.8, 135.2, 129.8, 126.3, 87.4, 21.5 ppm, carbons corresponding to the C<sub>3</sub>F<sub>7</sub> group cannot be identified due to C-F coupling.

**HRMS (m/z):** calcd for C<sub>13</sub>H<sub>12</sub>F<sub>7</sub>N<sub>2</sub> [M+H]<sup>+</sup> 329.0883, found: 329.0873.

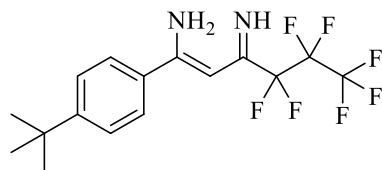

**(Z)-1-(4-(*tert*-Butyl)phenyl)-4,4,5,5,6,6,6-heptafluoro-3-imino-1-hex-1-amine (2f):**

Yield = 48% (53.5 mg). Yellow oil.

Purified by flash silica gel column chromatography through silica gel (petroleum ether/ethyl acetate, 200/1).

**<sup>1</sup>H NMR (400 MHz, CDCl<sub>3</sub>):**  $\delta$  = 9.55 (brs, 2H), 7.49 (q,  $J$  = 8.4 Hz, 4H), 5.82 (brs, 1H), 5.32 (s, 1H), 1.35 (s, 9H) ppm.

**<sup>19</sup>F NMR (376 MHz, CDCl<sub>3</sub>):**  $\delta$  = -80.36 (s, 3F), -120.00 (s, 2F), -126.47 (s, 2F) ppm.

**<sup>13</sup>C NMR (100 MHz, CDCl<sub>3</sub>):**  $\delta$  = 160.8 (t,  $J_{C-F}$  = 23.7 Hz), 160.7, 153.9, 135.2, 126.7 (d,  $J_{C-F}$  = 188.8 Hz), 126.0, 87.5, 35.0, 31.3 ppm, carbons corresponding to the C<sub>3</sub>F<sub>7</sub> group cannot be identified due to C-F coupling.

**HRMS (m/z):** calcd for C<sub>16</sub>H<sub>18</sub>F<sub>7</sub>N<sub>2</sub> [M+H]<sup>+</sup> 371.1353, found: 371.1348.

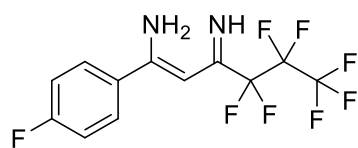

**(Z)-4,4,5,5,6,6,6-Heptafluoro-1-(4-fluorophenyl)-3-imino-1-hex-1-amine (2g):**

Yield = 61% (61.2 mg). Yellow oil.

Purified by flash silica gel column chromatography through silica gel (petroleum ether/ethyl acetate, 100/1).

**<sup>1</sup>H NMR (400 MHz, CDCl<sub>3</sub>):**  $\delta$  = 9.79 (brs, 2H), 7.59–7.51 (m, 2H), 7.17–7.09 (m, 2H), 5.79 (brs, 1H), 5.26 (s, 1H) ppm.

**<sup>19</sup>F NMR (376 MHz, CDCl<sub>3</sub>):**  $\delta$  = -80.37 (s, 3F), -110.08 (s, 1F), -120.15 (s, 2F), -126.48 (s, 2F) ppm.

**<sup>13</sup>C NMR (100 MHz, CDCl<sub>3</sub>):**  $\delta$  = 164.0 (d,  $J_{C-F}$  = 251.5 Hz), 160.6 (t,  $J_{C-F}$  = 23.2 Hz), 159.8, 134.4 (d,  $J_{C-F}$  = 3.0 Hz), 128.3 (d,  $J_{C-F}$  = 9.1 Hz), 116.1 (d,  $J_{C-F}$  = 22.2 Hz), 87.9 ppm, carbons corresponding to the C<sub>3</sub>F<sub>7</sub> group cannot be identified due to C-F coupling.

**HRMS (m/z):** calcd for C<sub>12</sub>H<sub>11</sub>F<sub>8</sub>N<sub>2</sub> [M+H]<sup>+</sup> 333.0633, found: 333.0626.

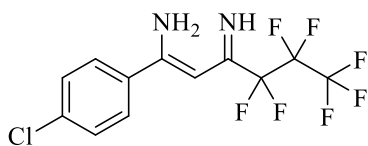

**(Z)-1-(4-Chlorophenyl)-4,4,5,5,6,6,6-heptafluoro-3-imino-hex-1-en-1-amine (2h):**

Yield = 81% (84.6 mg). Green oil.

Purified by flash silica gel column chromatography through silica gel (petroleum ether/ethyl acetate, 40/1).

<sup>1</sup>H NMR (400 MHz, CDCl<sub>3</sub>): δ = 9.43 (brs, 2H), 7.53–7.46 (m, 2H), 7.45–7.39 (m, 2H), 5.79 (brs, 1H), 5.28 (s, 1H) ppm.

<sup>19</sup>F NMR (376 MHz, CDCl<sub>3</sub>): δ = -80.31 (t, *J* = 9.7 Hz, 3F), -120.13 (q, *J* = 8.9 Hz, 2F), -126.47 (s, 2F) ppm.

<sup>13</sup>C NMR (100 MHz, CDCl<sub>3</sub>): δ = 160.6 (t, *J*<sub>C-F</sub> = 23.7 Hz), 159.6, 136.6, 136.5, 129.3, 127.7, 88.0 ppm, carbons corresponding to the C<sub>3</sub>F<sub>7</sub> group cannot be identified due to C-F coupling.

HRMS (m/z): calcd for C<sub>12</sub>H<sub>9</sub>ClF<sub>7</sub>N<sub>2</sub> [M+H]<sup>+</sup> 349.0337, found: 349.0331.

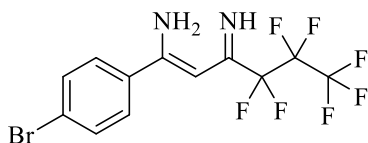

**(Z)-1-(4-Bromophenyl)-4,4,5,5,6,6,6-heptafluoro-3-imino-hex-1-en-1-amine (2i):**

Yield = 83% (98.2 mg). Yellow oil.

Purified by flash silica gel column chromatography through silica gel (petroleum ether/ethyl acetate, 100/1).

<sup>1</sup>H NMR (400 MHz, CDCl<sub>3</sub>): δ = 9.42 (brs, 2H), 7.62–7.53 (m, 2H), 7.47–7.39 (m, 2H), 5.79 (brs, 1H), 5.27 (s, 1H) ppm.

<sup>19</sup>F NMR (376 MHz, CDCl<sub>3</sub>): δ = -80.31 (t, *J* = 9.7 Hz, 3F), -120.13 (q, *J* = 8.9 Hz, 2F), -126.46 (s, 2F) ppm.

<sup>13</sup>C NMR (100 MHz, CDCl<sub>3</sub>): δ = 160.6 (t, *J*<sub>C-F</sub> = 24.2 Hz), 159.6, 137.1, 132.3, 127.9, 124.7, 88.0 ppm, carbons corresponding to the C<sub>3</sub>F<sub>7</sub> group cannot be identified due to C-F coupling.

HRMS (m/z): calcd for C<sub>12</sub>H<sub>9</sub>BrF<sub>7</sub>N<sub>2</sub> [M+H]<sup>+</sup> 392.9832, found: 392.9825.

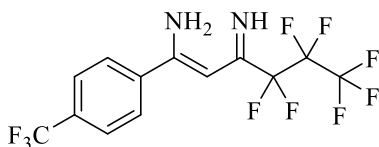

**(Z)-4,4,5,5,6,6,6-Heptafluoro-3-imino-1-(4-(trifluoromethyl)phenyl)hex-1-en-1-amine (2j):**

Yield = 28% (32.1 mg). Yellow oil.

Purified by flash silica gel column chromatography through silica gel (petroleum ether/ethyl acetate, 100/1).

<sup>1</sup>H NMR (400 MHz, CDCl<sub>3</sub>): δ = 9.41 (brs, 2H), 7.69 (q, *J* = 8.5 Hz, 4H), 5.85 (brs, 1H), 5.31 (s, 1H) ppm.

<sup>19</sup>F NMR (376 MHz, CDCl<sub>3</sub>): δ = -62.74 (s, 3F), -80.31 (t, *J* = 9.7 Hz, 3F), -120.21 (q, *J* = 8.9 Hz,



2F), -126.47 (s, 2F) ppm.

**<sup>13</sup>C NMR (100 MHz, CDCl<sub>3</sub>):**  $\delta$  = 160.6 (t,  $J_{C-F}$  = 24.2 Hz), 159.3, 141.7, 132.1 (q,  $J_{C-F}$  = 32.3 Hz), 126.8, 126.1 (q,  $J_{C-F}$  = 4.0 Hz), 125.2 (q,  $J_{C-F}$  = 248.5 Hz), 88.6 ppm, carbons corresponding to the C<sub>3</sub>F<sub>7</sub> group cannot be identified due to C-F coupling.

**HRMS (m/z):** calcd for C<sub>13</sub>H<sub>9</sub>F<sub>10</sub>N<sub>2</sub> [M+H]<sup>+</sup> 383.0601, found: 383.0608.

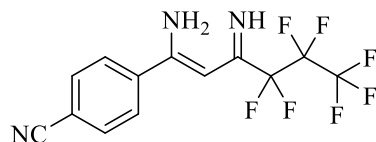

**(Z)-4-(1-Amino-4,4,5,5,6,6,6-heptafluoro-3-imino-1-en-1-yl)benzotrile (2k):**

Yield = 55% (55.9 mg). Yellow solid. M.p. 109.5-110.9 °C.

Purified by flash silica gel column chromatography through silica gel (petroleum ether/ethyl acetate, 10/1).

**<sup>1</sup>H NMR (400 MHz, CDCl<sub>3</sub>):**  $\delta$  = 9.41 (brs, 2H), 7.78–7.63 (m, 4H), 5.84 (brs, 1H), 5.30 (s, 1H) ppm.

**<sup>19</sup>F NMR (376 MHz, CDCl<sub>3</sub>):**  $\delta$  = -80.25 (t,  $J$  = 9.7 Hz, 3F), -120.22 (q,  $J$  = 8.9 Hz, 2F), -126.43 (s, 2F) ppm.

**<sup>13</sup>C NMR (100 MHz, CDCl<sub>3</sub>):**  $\delta$  = 160.5 (t,  $J_{C-F}$  = 23.7 Hz), 158.6, 142.4, 132.9, 127.1, 118.3, 113.9, 88.9 ppm, carbons corresponding to the C<sub>3</sub>F<sub>7</sub> group cannot be identified due to C-F coupling.

**HRMS (m/z):** calcd for C<sub>13</sub>H<sub>9</sub>F<sub>7</sub>N<sub>3</sub> [M+H]<sup>+</sup> 340.0679, found: 340.0675.

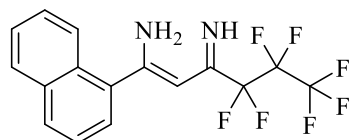

**(Z)-4,4,5,5,6,6,6-Heptafluoro-3-imino-1-(naphthalen-1-yl)hex-1-en-1-amine (2l):**

Yield = 48% (52.9 mg). Yellow oil

Purified by flash silica gel column chromatography through silica gel (petroleum ether/ethyl acetate, 100/1).

**<sup>1</sup>H NMR (400 MHz, CDCl<sub>3</sub>):**  $\delta$  = 9.74 (brs, 2H), 8.23–8.17 (m, 1H), 7.94–7.88 (m, 2H), 7.58–7.48 (m, 4H), 6.03 (brs, 1H), 5.28 (s, 1H) ppm.

**<sup>19</sup>F NMR (376 MHz, CDCl<sub>3</sub>):**  $\delta$  = -80.31 (s, 3F), -120.08 (s, 2F), -126.44 (s, 2F) ppm.

**<sup>13</sup>C NMR (100 MHz, CDCl<sub>3</sub>):**  $\delta$  = 161.4, 159.9 (t,  $J_{C-F}$  = 23.5 Hz), 136.9, 133.8, 130.3, 129.9, 128.6, 127.0, 126.5, 125.7, 125.3, 125.3, 91.0 ppm, carbons corresponding to the C<sub>3</sub>F<sub>7</sub> group cannot be identified due to C-F coupling.

**HRMS (m/z):** calcd for C<sub>16</sub>H<sub>12</sub>F<sub>7</sub>N<sub>2</sub> [M+H]<sup>+</sup> 365.0883, found: 365.0877.

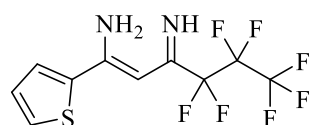

**(Z)-4,4,5,5,6,6,6-Heptafluoro-3-imino-1-(thiophen-2-yl)hex-1-en-1-amine (2m):**

Yield = 50% (48.0 mg). Yellow oil.

Purified by flash silica gel column chromatography through silica gel (petroleum ether/ethyl acetate, 100/1).

**<sup>1</sup>H NMR (400 MHz, CDCl<sub>3</sub>):**  $\delta$  = 9.11 (brs, 2H), 7.45–7.36 (m, 2H), 7.10 (dd,  $J$  = 5.1, 3.7 Hz, 1H), 6.09 (brs, 1H), 5.45 (s, 1H) ppm.

**<sup>19</sup>F NMR (376 MHz, CDCl<sub>3</sub>):**  $\delta$  = -80.29 (t,  $J$  = 8.9 Hz, 3F), -120.08 (q,  $J$  = 8.9 Hz, 2F), -126.52 (s, 2F) ppm.

**<sup>13</sup>C NMR (100 MHz, CDCl<sub>3</sub>):**  $\delta$  = 159.2 (t,  $J_{C-F}$  = 23.2 Hz), 154.3, 140.9, 128.2, 127.8, 126.0, 87.9 ppm, carbons corresponding to the C<sub>3</sub>F<sub>7</sub> group cannot be identified due to C-F coupling.

**HRMS (m/z):** calcd for C<sub>10</sub>H<sub>8</sub>F<sub>7</sub>N<sub>2</sub>S [M+H]<sup>+</sup> 321.0291, found: 321.0292.

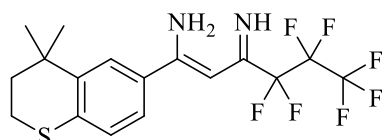

**(Z)-1-(4,4-Dimethylthiochroman-6-yl)-4,4,5,5,6,6,6-heptafluoro-3-imino-hex-1-en-1-amine**

**(2n):**

Yield = 74% (91.8 mg). Yellow oil.

Purified by flash silica gel column chromatography through silica gel (petroleum ether/ethyl acetate, 100/1).

**<sup>1</sup>H NMR (400 MHz, CDCl<sub>3</sub>):**  $\delta$  = 9.47 (brs, 2H), 7.53 (d,  $J$  = 2.0 Hz, 1H), 7.22 (dd,  $J$  = 8.2, 2.0 Hz, 1H), 7.14 (d,  $J$  = 8.2 Hz, 1H), 5.79 (brs, 1H), 5.27 (s, 1H), 3.09–3.03 (m, 2H), 2.00–1.95 (m, 2H), 1.37 (s, 6H) ppm.

**<sup>19</sup>F NMR (376 MHz, CDCl<sub>3</sub>):**  $\delta$  = -80.29 (t,  $J$  = 9.7 Hz, 3F), -120.08 (q,  $J$  = 9.4 Hz, 2F), -126.47 (s, 2F) ppm.

**<sup>13</sup>C NMR (100 MHz, CDCl<sub>3</sub>):**  $\delta$  = 160.8, 160.6 (t,  $J_{C-F}$  = 23.7 Hz), 142.6, 135.5, 133.8, 127.1, 124.1, 123.8, 87.2, 37.2, 33.2, 30.1, 23.2 ppm, carbons corresponding to the C<sub>3</sub>F<sub>7</sub> group cannot be identified due to C-F coupling.

**HRMS (m/z):** calcd for C<sub>17</sub>H<sub>18</sub>F<sub>7</sub>N<sub>2</sub>S [M+H]<sup>+</sup> 415.1073, found: 415.1071.

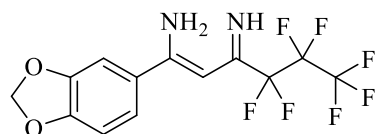

**(Z)-1-(Benzo[d][1,3]dioxol-5-yl)-4,4,5,5,6,6,6-heptafluoro-3-imino-hex-1-en-1-amine (2o):**

Yield = 69% (74.1 mg). Green oil.

Purified by flash silica gel column chromatography through silica gel (petroleum ether/ethyl acetate, 100/1).

**<sup>1</sup>H NMR (400 MHz, CDCl<sub>3</sub>):**  $\delta$  = 9.43 (brs, 2H), 7.08 (dd,  $J$  = 8.1, 1.9 Hz, 1H), 7.02 (d,  $J$  = 1.8 Hz, 1H), 6.85 (d,  $J$  = 8.1 Hz, 1H), 6.02 (s, 2H), 5.78 (brs, 1H), 5.25 (s, 1H) ppm.

**<sup>19</sup>F NMR (376 MHz, CDCl<sub>3</sub>):**  $\delta$  = -80.38 (s, 3F), -120.02 (s, 2F), -126.50 (s, 2F) ppm.

**<sup>13</sup>C NMR (100 MHz, CDCl<sub>3</sub>):**  $\delta$  = 160.5 (t,  $J_{C-F}$  = 23.2 Hz), 160.3, 149.5, 148.3, 132.3, 120.5, 108.7, 106.8, 101.8, 87.4 ppm, carbons corresponding to the C<sub>3</sub>F<sub>7</sub> group cannot be identified due to C-F coupling.

**HRMS (m/z):** calcd for C<sub>13</sub>H<sub>10</sub>F<sub>7</sub>N<sub>2</sub>O<sub>2</sub> [M+H]<sup>+</sup> 359.0625, found: 359.0621.

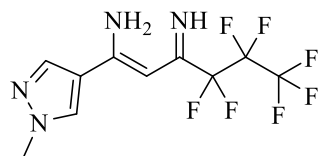

**(Z)-4,4,5,5,6,6,6-Heptafluoro-3-imino-1-(1-methyl-1H-pyrazol-4-yl)hex-1-en-1-amine (2p):**

Yield = 44% (41.5 mg). Yellow solid. M.p. 71.6-72.7 °C.

Purified by flash silica gel column chromatography through silica gel (petroleum ether/ethyl acetate, 4/1).

**<sup>1</sup>H NMR (400 MHz, CDCl<sub>3</sub>):** δ = 9.12 (brs, 2H), 7.70 (d, *J* = 0.8 Hz, 1H), 7.63 (d, *J* = 0.8 Hz, 1H), 5.86 (brs, 1H), 5.23 (s, 1H), 3.93 (s, 3H) ppm.

**<sup>19</sup>F NMR (376 MHz, CDCl<sub>3</sub>):** δ = -79.99 – -80.78 (m, 3F), -120.08 (s, 2F), -126.59 (s, 2F) ppm.

**<sup>13</sup>C NMR (100 MHz, CDCl<sub>3</sub>):** δ = 159.9 (t, *J*<sub>C-F</sub> = 23.2 Hz), 153.3, 137.0, 128.5, 120.8, 86.4, 39.4 ppm, carbons corresponding to the C<sub>3</sub>F<sub>7</sub> group cannot be identified due to C-F coupling.

**HRMS (m/z):** calcd for C<sub>10</sub>H<sub>10</sub>F<sub>7</sub>N<sub>4</sub> [M+H]<sup>+</sup> 319.0788, found: 319.0789.

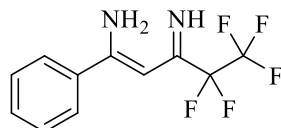

**(Z)-4,4,5,5,5-Pentafluoro-3-imino-1-phenylpent-1-en-1-amine (2t):**

Yield = 42% (33.2 mg). Yellow oil.

Purified by flash silica gel column chromatography through silica gel (petroleum ether/ethyl acetate, 100/1).

**<sup>1</sup>H NMR (400 MHz, CDCl<sub>3</sub>):** δ = 9.47 (brs, 2H), 7.63–7.40 (m, 5H), 5.89 (brs, 1H), 5.33 (s, 1H) ppm.

**<sup>19</sup>F NMR (376 MHz, CDCl<sub>3</sub>):** δ = -83.29 (s, 3F), -122.92 (s, 2F) ppm.

**<sup>13</sup>C NMR (100 MHz, CDCl<sub>3</sub>):** δ = 161.0, 160.7 (t, *J*<sub>C-F</sub> = 22.2 Hz), 138.2, 130.4, 129.1, 126.3, 87.5 ppm, carbons corresponding to the C<sub>2</sub>F<sub>5</sub> group cannot be identified due to C-F coupling.

**HRMS (m/z):** calcd for C<sub>11</sub>H<sub>10</sub>F<sub>5</sub>N<sub>2</sub> [M+H]<sup>+</sup> 265.0759, found: 265.0757.

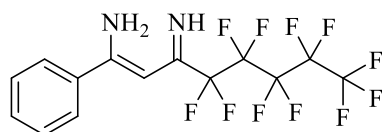

**(Z)-4,4,5,5,6,6,7,7,8,8,8-Undecafluoro-3-imino-1-phenyloct-1-en-1-amine (2u):**

Yield = 40% (49.0 mg). Yellow oil.

Purified by flash silica gel column chromatography through silica gel (petroleum ether/ethyl acetate, 100/1).

**<sup>1</sup>H NMR (400 MHz, CDCl<sub>3</sub>):** δ = 9.41 (brs, 2H), 7.60–7.53 (m, 2H), 7.49–7.41 (m, 3H), 5.82 (brs, 1H), 5.32 (s, 1H) ppm.

**<sup>19</sup>F NMR (376 MHz, CDCl<sub>3</sub>):** δ = -80.66 (t, *J* = 9.7 Hz, 3F), -119.15 (t, *J* = 14.2 Hz, 2F), -122.19 (t, *J* = 16.4 Hz, 2F), -121.82 – -122.42 (m, 2F), -126.03 – -126.23 (m, 2F) ppm.

**<sup>13</sup>C NMR (100 MHz, CDCl<sub>3</sub>):** δ = 160.9 (t, *J*<sub>C-F</sub> = 9.1 Hz), 160.6, 138.1, 130.4, 129.1, 126.3, 87.9

ppm, carbons corresponding to the C<sub>5</sub>F<sub>11</sub> group cannot be identified due to C-F coupling.

**HRMS (m/z):** calcd for C<sub>14</sub>H<sub>10</sub>F<sub>11</sub>N<sub>2</sub> [M+H]<sup>+</sup> 415.0663, found: 415.0657.

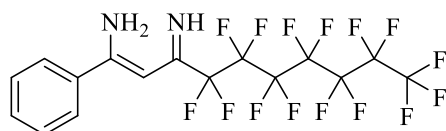

**(Z)-4,4,5,5,6,6,7,7,8,8,9,9,10,10,10-Pentadecafluoro-3-imino-1-phenyldec-1-en-1-amine (2v):**

Yield = 49% (76.4 mg). Yellow oil.

Purified by flash silica gel column chromatography through silica gel (petroleum ether/ethyl acetate, 100/1).

**<sup>1</sup>H NMR (400 MHz, CDCl<sub>3</sub>):**  $\delta$  = 9.43 (brs, 2H), 7.59–7.41 (m, 5H), 5.82 (brs, 1H), 5.33 (s, 1H) ppm.

**<sup>19</sup>F NMR (376 MHz, CDCl<sub>3</sub>):**  $\delta$  = -80.69 (t, *J* = 10.1 Hz, 3F), -119.13 (t, *J* = 14.2 Hz, 2F), -121.32 – -121.61 (m, 2F), -121.96 (s, 4F), -122.67 (dq, *J* = 21.2, 10.8 Hz, 2F), -125.94 – -126.27 (m, 2F) ppm.

**<sup>13</sup>C NMR (100 MHz, CDCl<sub>3</sub>):**  $\delta$  = 160.9 (t, *J*<sub>C-F</sub> = 24.2 Hz), 160.6, 138.2, 130.4, 129.1, 126.3, 87.9 ppm, carbons corresponding to the C<sub>7</sub>F<sub>15</sub> group cannot be identified due to C-F coupling.

**HRMS (m/z):** calcd for C<sub>16</sub>H<sub>10</sub>F<sub>15</sub>N<sub>2</sub> [M+H]<sup>+</sup> 515.0599, found: 515.0593.

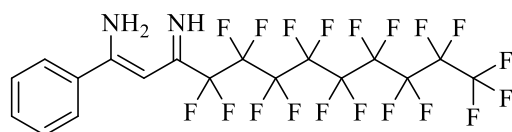

**(Z)-4,4,5,5,6,6,7,7,8,8,9,9,10,10,11,11,12,12,12-Nonadecafluoro-3-imino-1-phenyldodec-1-en-1-amine (2w):**

Yield = 33% (59.8 mg). White solid. 79.6-80.8 °C.

Purified by flash silica gel column chromatography through silica gel (petroleum ether/ethyl acetate, 100/1).

**<sup>1</sup>H NMR (400 MHz, CDCl<sub>3</sub>):**  $\delta$  = 9.47 (brs, 2H), 7.74–7.33 (m, 5H), 5.82 (brs, 1H), 5.32 (s, 1H) ppm.

**<sup>19</sup>F NMR (376 MHz, CDCl<sub>3</sub>):**  $\delta$  = -80.71 (t, *J* = 9.7 Hz, 3F), -119.15 (t, *J* = 14.2 Hz, 2F), -121.45 (s, 2F), -121.59 – -122.10 (m, 8F), -122.67 (d, *J* = 20.1 Hz, 2F), -125.97 – -126.24 (m, 2F) ppm.

**<sup>13</sup>C NMR (100 MHz, CDCl<sub>3</sub>):**  $\delta$  = 160.63 (t, *J*<sub>C-F</sub> = 23.7 Hz), 160.62, 138.2, 130.4, 129.1, 126.3, 87.9 ppm, carbons corresponding to the C<sub>9</sub>F<sub>19</sub> group cannot be identified due to C-F coupling.

**HRMS (m/z):** calcd for C<sub>18</sub>H<sub>10</sub>F<sub>19</sub>N<sub>2</sub> [M+H]<sup>+</sup> 615.0535, found: 615.0543.

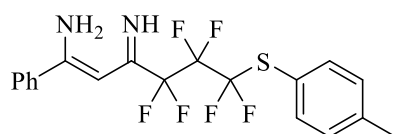

**(Z)-4,4,5,5,6-Hexafluoro-3-imino-1-phenyl-6-(p-tolylthio)hex-1-en-1-amine (2x):**

Yield = 61% (76.6 mg). Green oil.

Purified by flash silica gel column chromatography through silica gel (petroleum ether/ethyl

acetate, 10/1).

**<sup>1</sup>H NMR (400 MHz, CDCl<sub>3</sub>):**  $\delta$  = 9.54 (s, 2H), 7.60–7.52 (m, 4H), 7.47–7.41 (m, 3H), 7.24–7.18 (m, 2H), 5.78 (s, 1H), 5.37 (s, 1H), 2.39 (s, 3H) ppm.

**<sup>19</sup>F NMR (376 MHz, CDCl<sub>3</sub>):**  $\delta$  = -86.03 (tt,  $J$  = 10.8, 4.9 Hz, 2F), -118.06 (t,  $J$  = 10.8 Hz, 2F), -119.69 (t,  $J$  = 4.9 Hz, 2F) ppm.

**<sup>13</sup>C NMR (100 MHz, CDCl<sub>3</sub>):**  $\delta$  = 161.9 (t,  $J_{C-F}$  = 23.5 Hz), 160.3, 141.5, 138.4, 137.5, 130.3, 130.2, 129.0, 126.3, 119.8, 88.3, 21.5 ppm, carbons corresponding to the C<sub>3</sub>F<sub>6</sub> group cannot be identified due to C-F coupling.

**HRMS (m/z):** calcd for C<sub>19</sub>H<sub>17</sub>F<sub>6</sub>N<sub>2</sub>S [M+H]<sup>+</sup> 419.1011, found: 419.1013.

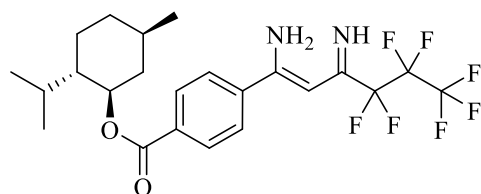

**(1R,2S,5R)-2-Isopropyl-5-methylcyclohexyl**

**4-((Z)-1-amino-4,4,5,5,6,6,6-heptafluoro-3-imino-hex-1-en-1-yl)benzoate (3a):**

Yield = 33% (33.1 mg, 0.2 mmol scale). Yellow oil.

Purified by flash silica gel column chromatography through silica gel (petroleum ether/ethyl acetate, 4/1).

**<sup>1</sup>H NMR (400 MHz, CDCl<sub>3</sub>):**  $\delta$  = 9.47 (brs, 2H), 8.13–8.09 (m, 2H), 7.62 (dd,  $J$  = 8.4, 1.7 Hz, 2H), 5.86 (brs, 1H), 5.33 (s, 1H), 4.99–4.90 (m, 1H), 2.17–2.12 (m, 1H), 1.94 (tt,  $J$  = 7.1, 3.6 Hz, 1H), 1.76–1.71 (m, 2H), 1.15–1.08 (m, 2H), 0.93 (td,  $J$  = 6.7, 1.7 Hz, 9H), 0.79 (dd,  $J$  = 6.9, 1.6 Hz, 4H) ppm.

**<sup>19</sup>F NMR (376 MHz, CDCl<sub>3</sub>):**  $\delta$  = -80.34 (s, 3F), -120.13 (s, 2F), -126.44 (s, 2F) ppm.

**<sup>13</sup>C NMR (100 MHz, CDCl<sub>3</sub>):**  $\delta$  = 165.5, 159.6 (t,  $J_{C-F}$  = 22.7 Hz), 142.1, 132.5, 130.3, 126.3, 88.5, 75.4, 47.4, 41.1, 34.4, 31.6, 26.7, 23.8, 22.2, 20.9, 16.7 ppm, carbons corresponding to the C<sub>3</sub>F<sub>7</sub> group cannot be identified due to C-F coupling.

**HRMS (m/z):** calcd for C<sub>23</sub>H<sub>28</sub>F<sub>7</sub>N<sub>2</sub>O<sub>2</sub> [M+H]<sup>+</sup> 497.2034, found: 497.2036.

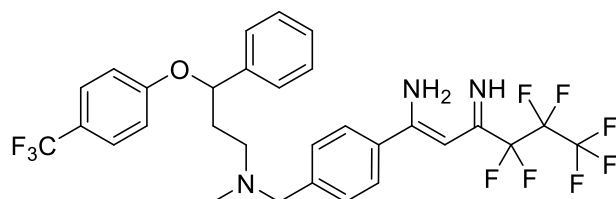

**(Z)-4,4,5,5,6,6,6-Heptafluoro-3-imino-1-(4-((methyl(3-phenyl-3-(4-(trifluoromethyl)phenoxy)propyl)amino)methyl)phenyl)hex-1-en-1-amine (3b):**

Yield = 63% (80.7 mg, 0.2 mmol scale). Yellow oil.

Purified by flash silica gel column chromatography through silica gel (petroleum ether/ethyl acetate, 4/1).

**<sup>1</sup>H NMR (400 MHz, CDCl<sub>3</sub>):**  $\delta$  = 9.42 (brs, 2H), 7.46–7.38 (m, 4H), 7.35–7.27 (m, 7H), 6.92–6.80 (m, 2H), 5.77 (brs, 1H), 5.37 (dd,  $J$  = 8.5, 4.5 Hz, 1H), 5.32 (s, 1H), 3.61–3.43 (m, 2H), 2.71–2.62 (m, 1H), 2.45 (ddd,  $J$  = 12.3, 7.0, 5.1 Hz, 1H), 2.27 (s, 3H), 2.24–2.15 (m, 1H), 2.03 (dtd,  $J$  = 14.4, 7.4, 4.5 Hz, 1H) ppm.

<sup>19</sup>F NMR (376 MHz, CDCl<sub>3</sub>): δ = -61.35 (d, *J* = 18.2 Hz, 3F), -80.29 (s, 3F), -120.02 (s, 2F), -126.45 (s, 2F) ppm.

<sup>13</sup>C NMR (100 MHz, CDCl<sub>3</sub>): δ = 160.8, 160.7 (t, *J*<sub>C-F</sub> = 23.2 Hz), 160.4, 141.9, 141.4, 136.7, 129.5, 128.9, 127.9, 126.8 (q, *J*<sub>C-F</sub> = 3.7 Hz), 126.1, 125.9, 122.8 (q, *J*<sub>C-F</sub> = 32.4 Hz), 121.8 (q, *J*<sub>C-F</sub> = 269.8 Hz), 115.8, 87.5, 78.0, 62.3, 53.2, 42.4, 36.8 ppm, carbons corresponding to the C<sub>3</sub>F<sub>7</sub> group cannot be identified due to C-F coupling.

HRMS (m/z): calcd for C<sub>30</sub>H<sub>28</sub>F<sub>10</sub>N<sub>3</sub>O [M+H]<sup>+</sup> 636.2067, found: 636.2071.

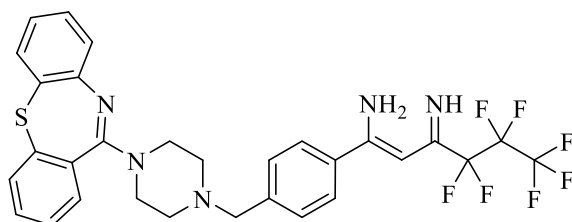

**(Z)-1-(4-((4-(Dibenzo[*b,f*][1,4]thiazepin-11-yl)piperazin-1-yl)methyl)phenyl)-4,4,5,5,6,6,6-heptafluoro-3-iminohex-1-en-1-amine (3c):**

Yield = 72% (134.9 mg). Yellow oil.

Purified by flash silica gel column chromatography through silica gel (petroleum ether/ethyl acetate, 2/1).

<sup>1</sup>H NMR (400 MHz, CDCl<sub>3</sub>): δ = 9.37 (brs, 2H), 7.51 (td, *J* = 3.7, 1.6 Hz, 5H), 7.41 (s, 3H), 7.41–7.38 (m, 1H), 7.35–7.27 (m, 5H), 7.20–7.15 (m, 1H), 7.07 (dd, *J* = 8.0, 1.6 Hz, 1H), 6.91–6.86 (m, 1H), 5.87 (brs, 1H), 5.32 (s, 1H), 3.60 (s, 3H), 2.52–2.48 (m, 2H) ppm.

<sup>19</sup>F NMR (376 MHz, CDCl<sub>3</sub>): δ = -80.29 (t, *J* = 9.7 Hz, 3F), -119.99 (q, *J* = 10.4 Hz, 2F), -126.41 (s, 2F) ppm.

<sup>13</sup>C NMR (100 MHz, CDCl<sub>3</sub>): δ = 160.92, 160.91, 160.7, 160.5, 149.0, 140.5, 140.0, 137.0, 134.2, 132.33, 132.29, 130.9, 129.8, 129.3, 129.1, 128.4, 128.1, 126.3, 125.4, 123.0, 87.7, 62.7, 53.0 ppm, carbons corresponding to the C<sub>3</sub>F<sub>7</sub> group cannot be identified due to C-F coupling.

HRMS (m/z): calcd for C<sub>30</sub>H<sub>27</sub>F<sub>7</sub>N<sub>5</sub>S [M+H]<sup>+</sup> 622.1870, found: 622.1874.

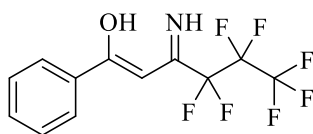

**(Z)-4,4,5,5,6,6,6-Heptafluoro-3-imino-1-phenylhex-1-en-1-ol (4):**

Yield = 44% (28.2 mg, 0.2 mmol scale). White solid. M.p. 69.3-70.7 °C.

Purified by flash silica gel column chromatography through silica gel (petroleum ether/ethyl acetate, 4/1).

<sup>1</sup>H NMR (400 MHz, CDCl<sub>3</sub>): δ = 10.31 (brs, 1H), 7.65–7.47 (m, 5H), 6.14 (brs, 1H), 5.85 (s, 1H) ppm.

<sup>19</sup>F NMR (376 MHz, CDCl<sub>3</sub>): δ = -80.47 (t, *J* = 8.9 Hz, 3F), -120.96 (q, *J* = 9.7 Hz, 2F), -126.79 (s, 2F) ppm.

<sup>13</sup>C NMR (100 MHz, CDCl<sub>3</sub>): δ = 179.1 (t, *J*<sub>C-F</sub> = 25.5 Hz), 167.3, 135.4, 132.2, 129.5, 126.6, 89.8 ppm, carbons corresponding to the C<sub>3</sub>F<sub>7</sub> group cannot be identified due to C-F coupling.

HRMS (m/z): calcd for C<sub>12</sub>H<sub>9</sub>F<sub>7</sub>NO [M+H]<sup>+</sup> 316.0567, found: 316.0566.

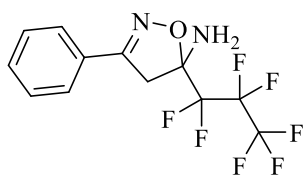

**5-(2,2,3,3,4,4,4-Heptafluorobutyl)-3-phenyl-4,5-dihydroisoxazol-5-amine (5):**

Yield = 75% (49.4 mg, 0.2 mmol scale). Yellow solid. M.p. 122.6-122.9 °C.

Purified by flash silica gel column chromatography through silica gel (petroleum ether/ethyl acetate, 4/1).

**<sup>1</sup>H NMR (400 MHz, CDCl<sub>3</sub>):**  $\delta$  = 7.67–7.62 (m, 2H), 7.48–7.39 (m, 3H), 3.80 (d,  $J$  = 18.2 Hz, 1H), 3.25 (d,  $J$  = 18.2 Hz, 1H), 2.46 (brs, 2H) ppm.

**<sup>19</sup>F NMR (376 MHz, CDCl<sub>3</sub>):**  $\delta$  = -80.85 (s, 3F), -120.54 (d,  $J$  = 23.8 Hz, 1F), -122.36 (dd,  $J$  = 292.0, 17.9 Hz, 1F), -123.32 (d,  $J$  = 286.1 Hz, 1F), -124.43 – -125.37 (m, 1F) ppm.

**<sup>13</sup>C NMR (100 MHz, CDCl<sub>3</sub>):**  $\delta$  = 155.7, 131.0, 129.1, 128.4, 126.8, 96.5 (t,  $J_{C-F}$  = 25.8 Hz), 43.0 ppm, carbons corresponding to the C<sub>3</sub>F<sub>7</sub> group cannot be identified due to C-F coupling.

**HRMS (m/z):** calcd for C<sub>12</sub>H<sub>10</sub>F<sub>7</sub>N<sub>2</sub>O [M+H]<sup>+</sup> 331.0676, found: 331.0667.

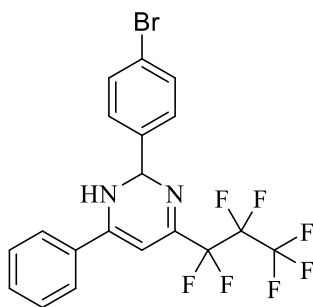

**2-(4-Bromophenyl)-4-(perfluoropropyl)-6-phenyl-1,2-dihydropyrimidine (6):**

Yield = 52% (49.7 mg, 0.2 mmol scale). Yellow solid. M.p. 83.5-84.9 °C.

Purified by flash silica gel column chromatography through silica gel (petroleum ether/ethyl acetate, 4/1).

**<sup>1</sup>H NMR (400 MHz, CDCl<sub>3</sub>):**  $\delta$  = 7.60 (dd,  $J$  = 7.0, 1.7 Hz, 2H), 7.56–7.50 (m, 3H), 7.50–7.43 (m, 4H), 5.95 (s, 1H), 5.79 (s, 1H), 4.36 (brs, 1H) ppm.

**<sup>19</sup>F NMR (376 MHz, CDCl<sub>3</sub>):**  $\delta$  = -80.20 (t,  $J$  = 14.1 Hz, 3F), -114.64 – -117.86 (m, 2F), -126.45 (d,  $J$  = 10.4 Hz, 2F) ppm.

**<sup>13</sup>C NMR (100 MHz, CDCl<sub>3</sub>):**  $\delta$  = 157.3 (t,  $J_{C-F}$  = 14.1 Hz), 153.7, 139.1, 132.9, 131.93, 131.90, 129.3, 129.1, 127.4, 122.9, 92.7, 71.5 ppm, carbons corresponding to the C<sub>3</sub>F<sub>7</sub> group cannot be identified due to C-F coupling.

**HRMS (m/z):** calcd for C<sub>19</sub>H<sub>13</sub>BrF<sub>7</sub>N<sub>2</sub> [M+H]<sup>+</sup> 481.0145, found: 481.0144.

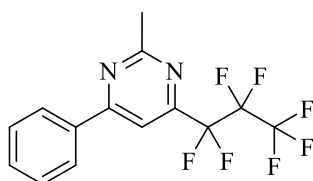

**2-Methyl-4-(perfluoropropyl)-6-phenylpyrimidine (7):**

Yield = 79% (53.6 mg, 0.2 mmol scale). Colorless oil.

Purified by flash silica gel column chromatography through silica gel (petroleum ether/ethyl acetate, 4/1).

**<sup>1</sup>H NMR (400 MHz, CDCl<sub>3</sub>):**  $\delta$  = 8.16–8.12 (m, 2H), 7.83 (s, 1H), 7.58–7.51 (m, 3H), 2.89 (s, 3H) ppm.

**<sup>19</sup>F NMR (376 MHz, CDCl<sub>3</sub>):**  $\delta$  = -80.06 (d,  $J$  = 35.8 Hz, 3F), -116.89 (t,  $J$  = 23.8 Hz, 2F), -126.09 (s, 2F) ppm.

**<sup>13</sup>C NMR (100 MHz, CDCl<sub>3</sub>):**  $\delta$  = 169.5, 166.4, 156.4 (t,  $J_{C-F}$  = 25.3 Hz), 135.9, 132.0, 129.3, 127.6, 111.6, 26.4 ppm, carbons corresponding to the C<sub>3</sub>F<sub>7</sub> group cannot be identified due to C-F coupling.

**HRMS (m/z):** calcd for C<sub>14</sub>H<sub>10</sub>F<sub>7</sub>N<sub>2</sub> [M+H]<sup>+</sup> 339.0727, found: 339.0727.

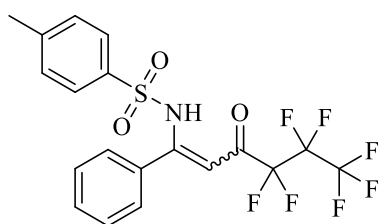***N*-(4,4,5,5,6,6,6-Heptafluoro-3-oxo-1-phenylhex-1-en-1-yl)-4-methylbenzenesulfonamide (10a):**

Yield = 49% (69.0 mg,  $E/Z$  = 1/3). Yellow oil.

Purified by flash silica gel column chromatography through silica gel (petroleum ether/ethyl acetate, 10/1).

**<sup>1</sup>H NMR (400 MHz, CDCl<sub>3</sub>) of *E*- and *Z*-isomers:**  $\delta$  = 11.68 (s, 0.3H), 9.51 (s, 0.7H), 7.67–7.63 (m, 1.5H), 7.54–7.50 (m, 0.4H), 7.47–7.44 (m, 1.9H), 7.43–7.41 (m, 0.4H), 7.40–7.34 (m, 2.6H), 7.28 (s, 0.3H), 7.20–7.18 (m, 1.9H), 5.79 (s, 0.3H), 5.36 (s, 0.7H), 2.41 (s, 0.8H), 2.38 (s, 2.2H) ppm.

**<sup>19</sup>F NMR (376 MHz, CDCl<sub>3</sub>) of *E*- and *Z*-isomers:**  $\delta$  = -80.09 (t,  $J$  = 9.7 Hz, 2.1F), -80.46 (t,  $J$  = 8.9 Hz, 0.9F), -119.43 (q,  $J$  = 10.4 Hz, 1.5F), -121.49 (q,  $J$  = 8.9 Hz, 0.5F), -126.44 (s, 1.5F), -126.61 (s, 0.5F) ppm.

**<sup>13</sup>C NMR (100 MHz, CDCl<sub>3</sub>) of *E*- and *Z*-isomers:**  $\delta$  = 182.4, 177.3, 163.4, 147.1 (t,  $J_{C-F}$  = 24.5 Hz), 145.4, 143.3, 139.4, 138.5, 136.0, 132.3, 132.0, 130.6, 129.8, 129.5, 129.3, 128.3, 128.2, 127.7, 127.6, 127.0, 100.7, 97.2, 21.7, 21.6 ppm, carbons corresponding to the C<sub>3</sub>F<sub>7</sub> group cannot be identified due to C-F coupling.

**HRMS (m/z):** calcd for C<sub>19</sub>H<sub>15</sub>F<sub>7</sub>NO<sub>3</sub>S [M+H]<sup>+</sup> 470.0655, found: 470.0662.

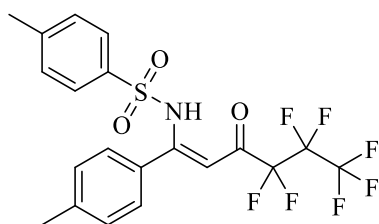***Z*-*N*-(4,4,5,5,6,6,6-Heptafluoro-3-oxo-1-(*p*-tolyl)hex-1-en-1-yl)-4-methylbenzenesulfonamide**



**(10b):**

Yield = 45% (65.4 mg). Green oil.

Purified by flash silica gel column chromatography through silica gel (petroleum ether/ethyl acetate, 10/1).

**<sup>1</sup>H NMR (400 MHz, CDCl<sub>3</sub>):**  $\delta$  = 11.74 (s, 1H), 7.40–7.35 (m, 2H), 7.23–7.15 (m, 6H), 5.78 (s, 1H), 2.42 (s, 3H), 2.41 (s, 3H) ppm.

**<sup>19</sup>F NMR (376 MHz, CDCl<sub>3</sub>):**  $\delta$  = -80.46 (t,  $J$  = 8.7 Hz, 3F), -121.50 (q,  $J$  = 8.7 Hz, 2F), -126.65 (s, 2F) ppm.

**<sup>13</sup>C NMR (100 MHz, CDCl<sub>3</sub>):**  $\delta$  = 182.3 (t,  $J_{C-F}$  = 25.5 Hz), 163.6, 145.3, 143.0, 136.1, 129.8, 129.7, 129.4, 129.0, 127.7, 100.8, 21.7 ppm, carbons corresponding to the C<sub>3</sub>F<sub>7</sub> group cannot be identified due to C-F coupling.

**HRMS (m/z):** calcd for C<sub>20</sub>H<sub>17</sub>F<sub>7</sub>NO<sub>3</sub>S [M+H]<sup>+</sup> 484.0812, found: 484.0812.

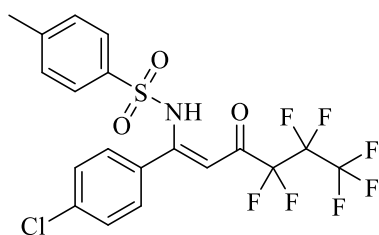

**(Z)-N-(1-(4-Chlorophenyl)-4,4,5,5,6,6,6-heptafluoro-3-oxohex-1-en-1-yl)-4-methylbenzenesulfonamide (10c):**

Yield = 43% (64.8 mg). Green oil.

Purified by flash silica gel column chromatography through silica gel (petroleum ether/ethyl acetate, 10/1).

**<sup>1</sup>H NMR (400 MHz, CDCl<sub>3</sub>):**  $\delta$  = 11.68 (s, 1H), 7.41–7.33 (m, 4H), 7.25–7.22 (m, 4H), 5.77 (s, 1H), 2.42 (s, 3H) ppm.

**<sup>19</sup>F NMR (376 MHz, CDCl<sub>3</sub>):**  $\delta$  = -80.42 (t,  $J$  = 8.7 Hz, 3F), -121.49 (q,  $J$  = 8.7 Hz, 2F), -126.58 (s, 2F) ppm.

**<sup>13</sup>C NMR (100 MHz, CDCl<sub>3</sub>):**  $\delta$  = 182.5 (t,  $J_{C-F}$  = 25.5 Hz), 161.8, 145.5, 138.5, 135.9, 130.8, 130.6, 129.9, 128.6, 127.6, 100.9, 21.7 ppm, carbons corresponding to the C<sub>3</sub>F<sub>7</sub> group cannot be identified due to C-F coupling.

**HRMS (m/z):** calcd for C<sub>19</sub>H<sub>14</sub>ClF<sub>7</sub>NO<sub>3</sub>S [M+H]<sup>+</sup> 504.0266, found: 504.0270.

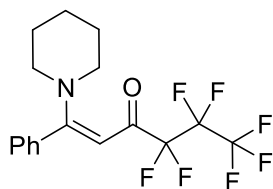

**(Z)-4,4,5,5,6,6,6-Heptafluoro-1-phenyl-1-(piperidin-1-yl)hex-1-en-3-one (12):**

Yield = 38% (43.6 mg). Yellow oil.

Purified by flash silica gel column chromatography through silica gel (petroleum ether/ethyl acetate, 4/1).

**<sup>1</sup>H NMR (400 MHz, CDCl<sub>3</sub>):**  $\delta$  = 7.89 (dd,  $J$  = 7.4, 2.0 Hz, 2H), 7.53 (dd,  $J$  = 8.4, 6.1 Hz, 1H), 7.46 (t,  $J$  = 7.6 Hz, 2H), 6.32 (s, 1H), 3.10 (s, 4H), 1.62 (s, 6H) ppm.

$^{19}\text{F}$  NMR (376 MHz,  $\text{CDCl}_3$ ):  $\delta$  = -80.27 (s, 3F), -109.37 (s, 2F), -124.83 (s, 2F) ppm.

$^{13}\text{C}$  NMR (100 MHz,  $\text{CDCl}_3$ ):  $\delta$  = 188.0, 148.8 (t,  $J_{\text{C-F}}$  = 21.7 Hz), 139.1, 132.6, 128.7, 128.4, 105.6, 53.3, 26.3, 23.7 ppm, carbons corresponding to the  $\text{C}_3\text{F}_7$  group cannot be identified due to C-F coupling.

HRMS (m/z): calcd for  $\text{C}_{17}\text{H}_{17}\text{F}_7\text{NO}$   $[\text{M}+\text{H}]^+$  384.1193, found: 384.1195.

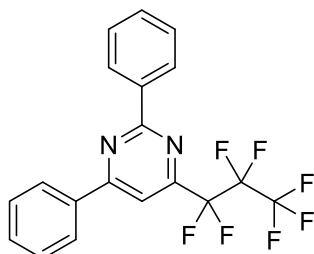

#### 4-(Perfluoropropyl)-2,6-diphenylpyrimidine (16b):

Yield = 77% (92.6 mg). Colorless oil.

Purified by flash silica gel column chromatography through silica gel (petroleum ether/ethyl acetate, 200/1~100/1).

$^1\text{H}$  NMR (400 MHz,  $\text{CDCl}_3$ ):  $\delta$  = 8.69–8.63 (m, 2H), 8.32–8.25 (m, 2H), 7.92 (s, 1H), 7.61–7.53 (m, 6H) ppm.

$^{19}\text{F}$  NMR (376 MHz,  $\text{CDCl}_3$ ):  $\delta$  = -79.95 (t,  $J$  = 9.2 Hz, 3F), -116.50 (q,  $J$  = 9.8 Hz, 2F), -126.04 (s, 2F) ppm.

$^{13}\text{C}$  NMR (100 MHz,  $\text{CDCl}_3$ ):  $\delta$  = 166.4, 165.2, 156.9 (t,  $J_{\text{C-F}}$  = 26.0 Hz), 136.7, 136.0, 132.0, 131.8, 129.3, 128.9, 128.8, 127.6, 111.7 (t,  $J_{\text{C-F}}$  = 4 Hz) ppm, carbons corresponding to the  $\text{C}_3\text{F}_7$  group cannot be identified due to C-F coupling.

HRMS (m/z): calcd for  $\text{C}_{19}\text{H}_{12}\text{F}_7\text{N}_2$   $[\text{M}+\text{H}]^+$  401.0883, found: 401.0886.

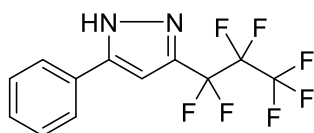

#### 3-(Perfluoropropyl)-5-phenyl-1H-pyrazole (16c):

Yield = 54% (50.8 mg). Yellow oil.

Purified by flash silica gel column chromatography through silica gel (petroleum ether/ethyl acetate, 20/1~10/1).

$^1\text{H}$  NMR (400 MHz,  $\text{CDCl}_3$ ):  $\delta$  = 12.46 (s, 1H), 7.63–7.56 (m, 2H), 7.50–7.38 (m, 3H), 6.78 (s, 1H) ppm.

$^{19}\text{F}$  NMR (376 MHz,  $\text{CDCl}_3$ ):  $\delta$  = -80.10 (t,  $J$  = 9.8 Hz, 3F), -110.91 (dd,  $J$  = 9.2, 8.7 Hz, 2F), -126.93 (s, 2F) ppm.

$^{13}\text{C}$  NMR (100 MHz,  $\text{CDCl}_3$ ):  $\delta$  = 145.5, 142.2 (t,  $J_{\text{C-F}}$  = 24.0 Hz), 129.6, 129.4, 128.0, 125.8, 102.8 ppm, carbons corresponding to the  $\text{C}_3\text{F}_7$  group cannot be identified due to C-F coupling.

HRMS (m/z): calcd for  $\text{C}_{12}\text{H}_8\text{F}_7\text{N}_2$   $[\text{M}+\text{H}]^+$  313.0570, found: 313.0571.

## **Reference**

- [1] G. Wu, A. Jacobi von Wangelin, *Chem. Sci.* **2018**, *9*, 1795-1802.
- [2] T. Xu, C. W. Cheung, X. Hu, *Angew. Chem. Int. Ed.* **2014**, *53*, 4910-4914.
- [3] R. Anilkumar, D. J. Burton, *J. Fluorine Chem.* **2005**, *126*, 1174-1184.

## $^1\text{H}$ , $^{19}\text{F}$ , and $^{13}\text{C}$ NMR spectra of products

$^1\text{H}$  NMR spectra of the product **2a** (400 MHz,  $\text{CDCl}_3$ )

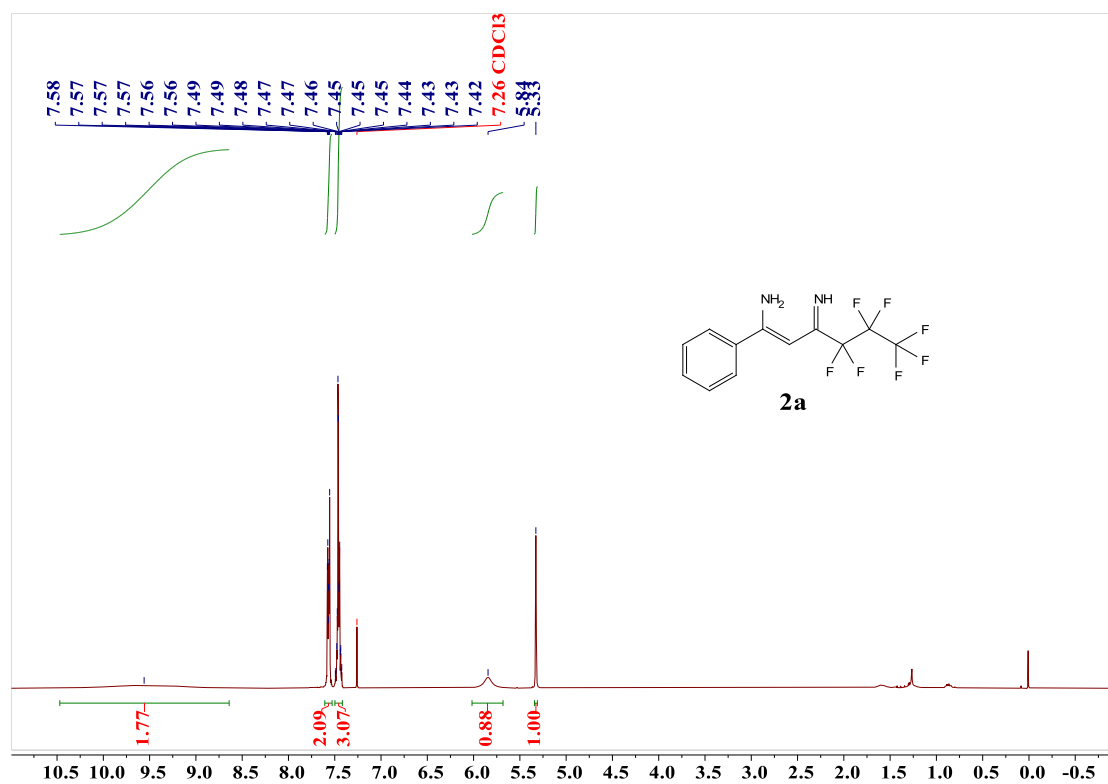

$^{19}\text{F}$  NMR spectra of the product **2a** (376 MHz,  $\text{CDCl}_3$ )

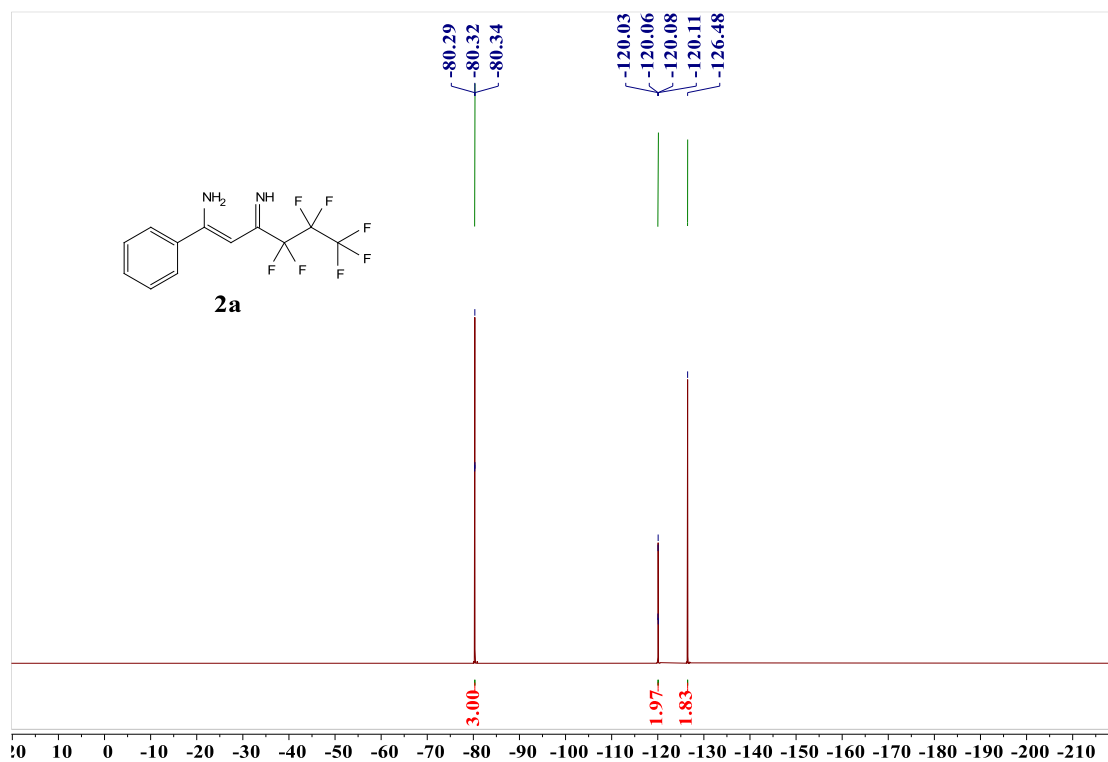

$^{13}\text{C}$  NMR spectra of the product **2a** (100 MHz,  $\text{CDCl}_3$ )

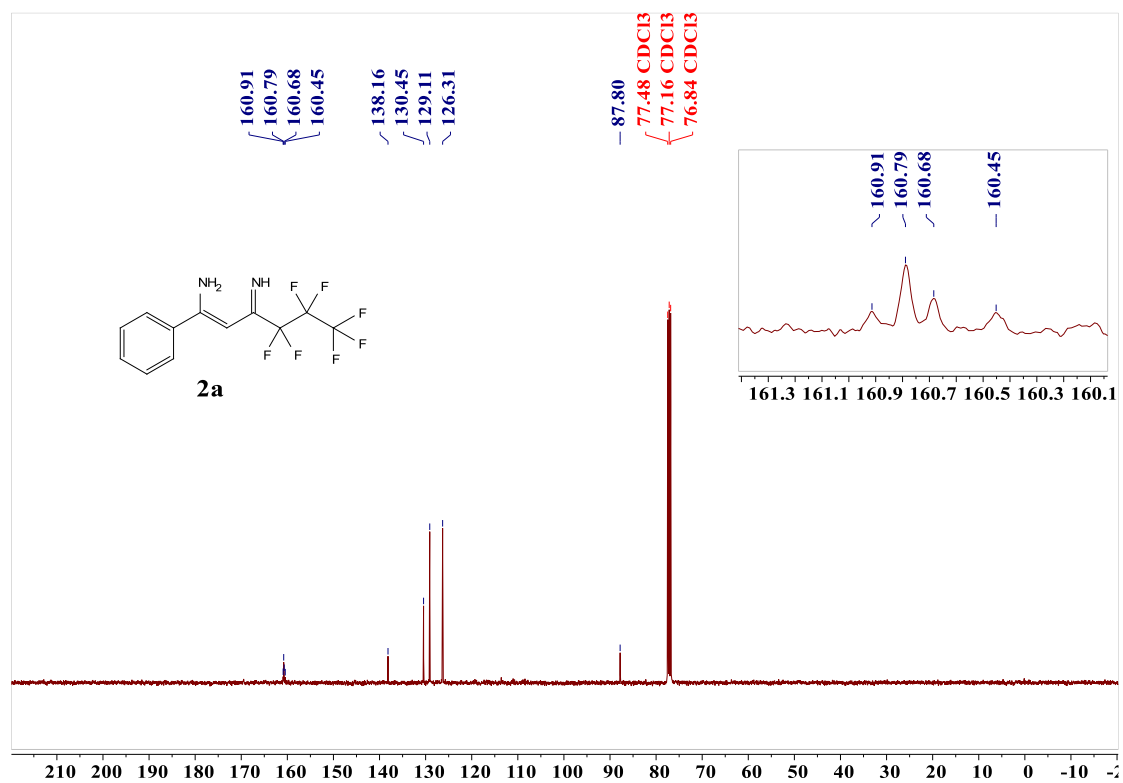

$^1\text{H}$  NMR spectra of the product **2b** (400 MHz,  $\text{CDCl}_3$ )

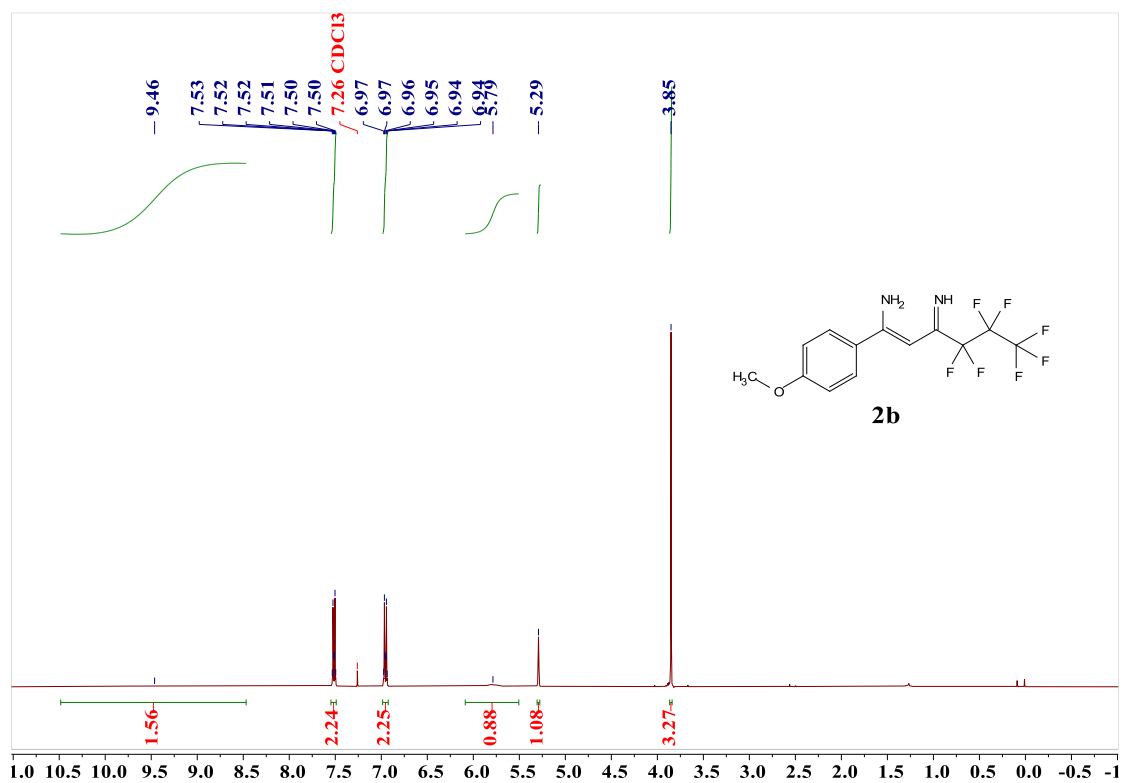

$^{19}\text{F}$  NMR spectra of the product **2b** (376 MHz,  $\text{CDCl}_3$ )

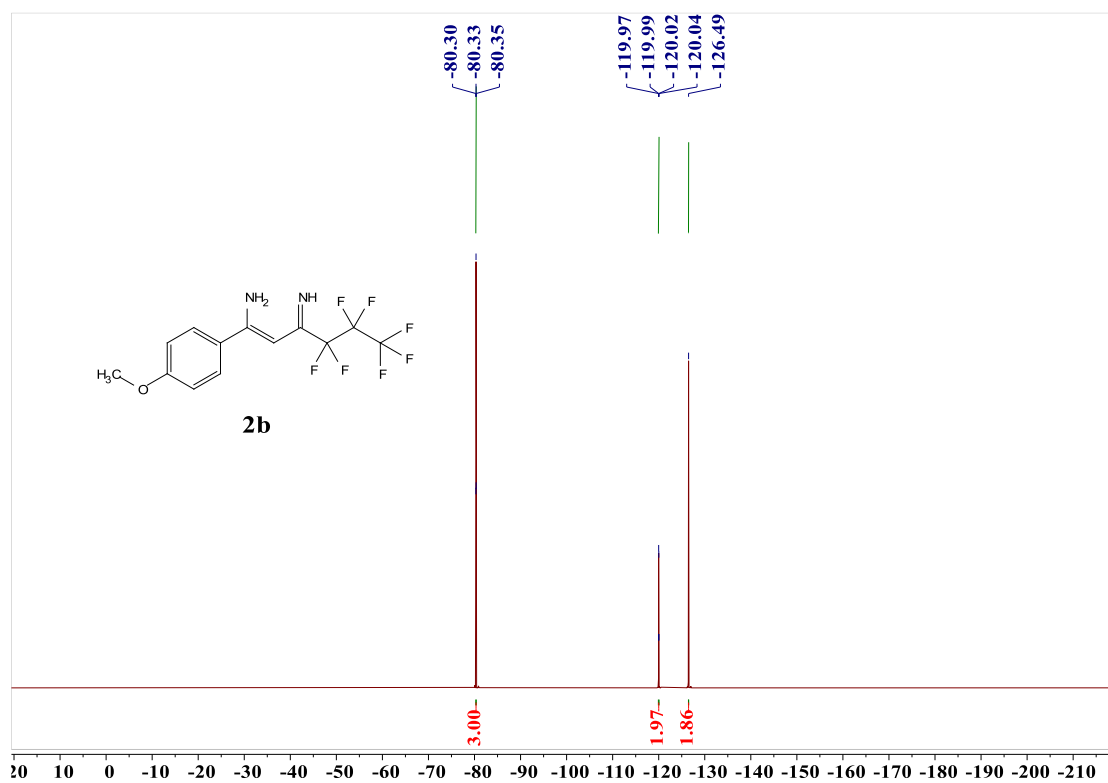

$^{13}\text{C}$  NMR spectra of the product **2b** (100 MHz,  $\text{CDCl}_3$ )

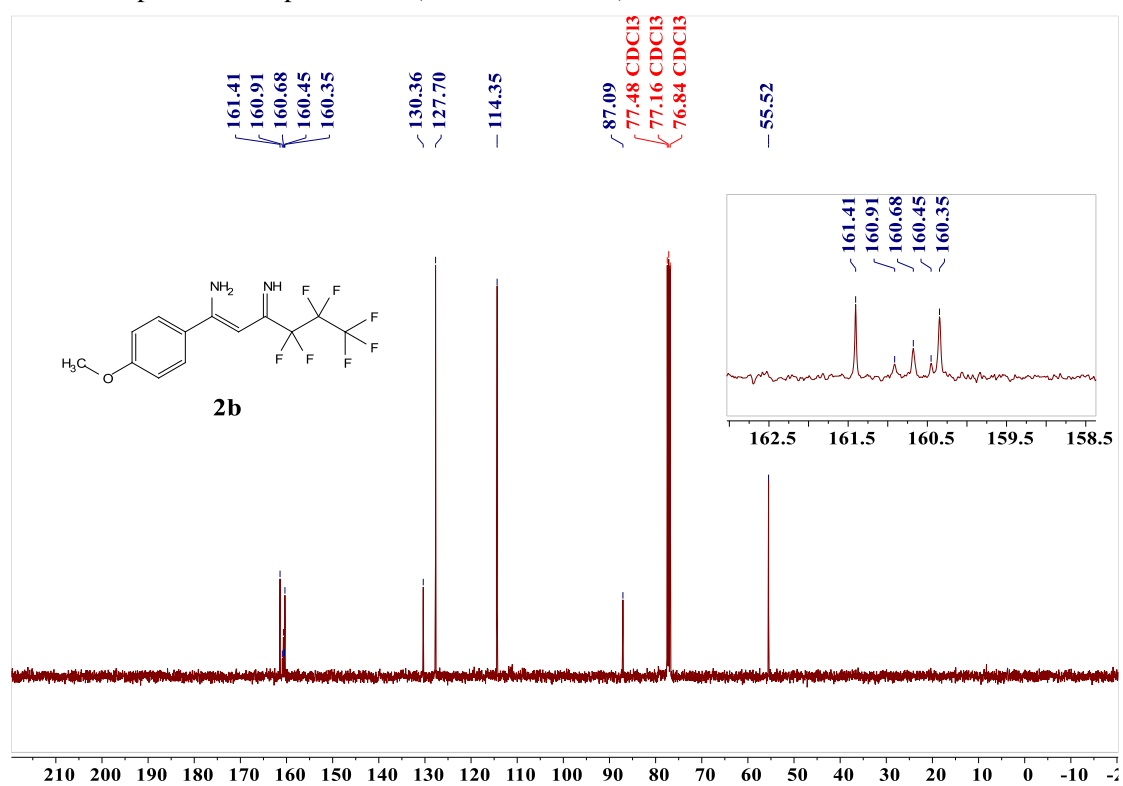

$^1\text{H}$  NMR spectra of the product **2c** (400 MHz,  $\text{CDCl}_3$ )

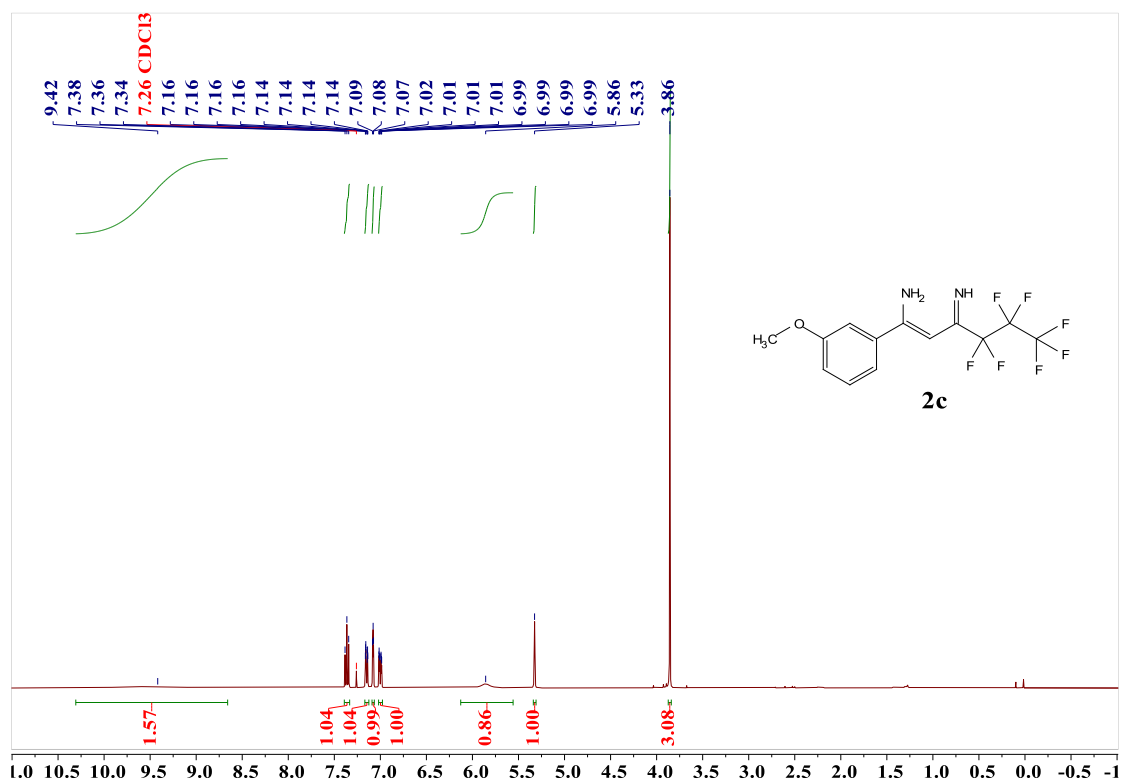

$^{19}\text{F}$  NMR spectra of the product **2c** (376 MHz,  $\text{CDCl}_3$ )

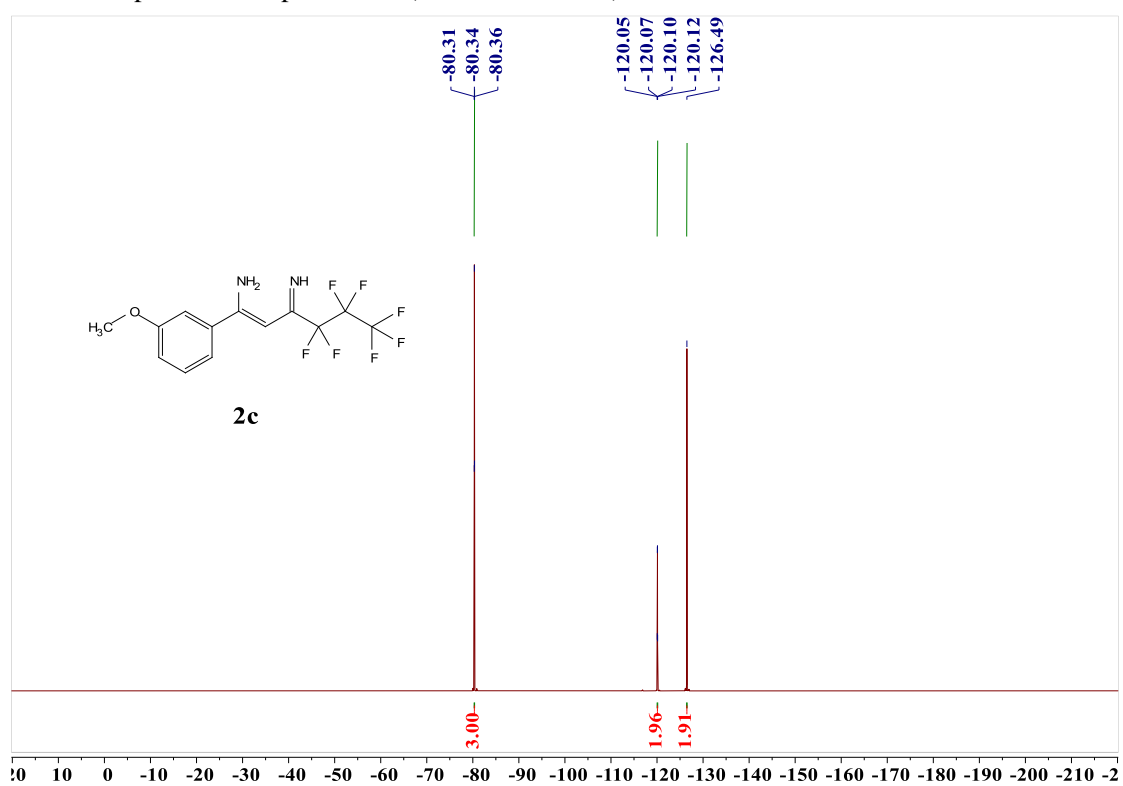

$^{13}\text{C}$  NMR spectra of the product **2c** (100 MHz,  $\text{CDCl}_3$ )

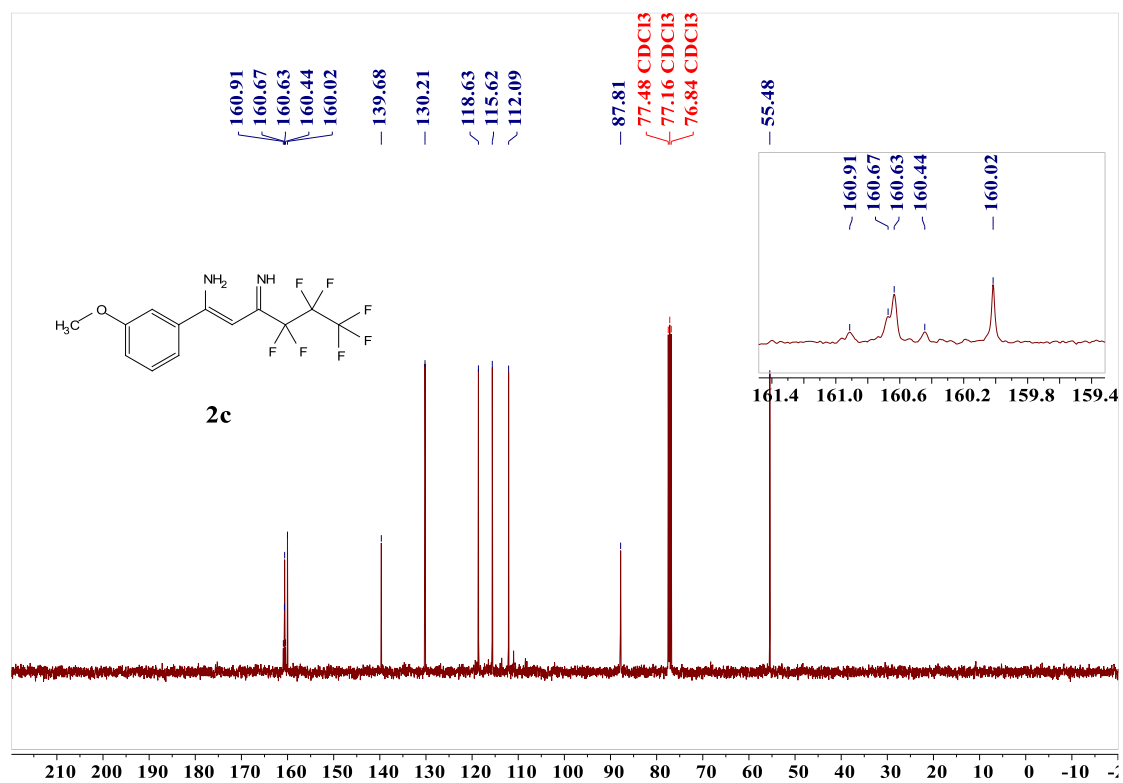

$^1\text{H}$  NMR spectra of the product **2d** (400 MHz,  $\text{CDCl}_3$ )

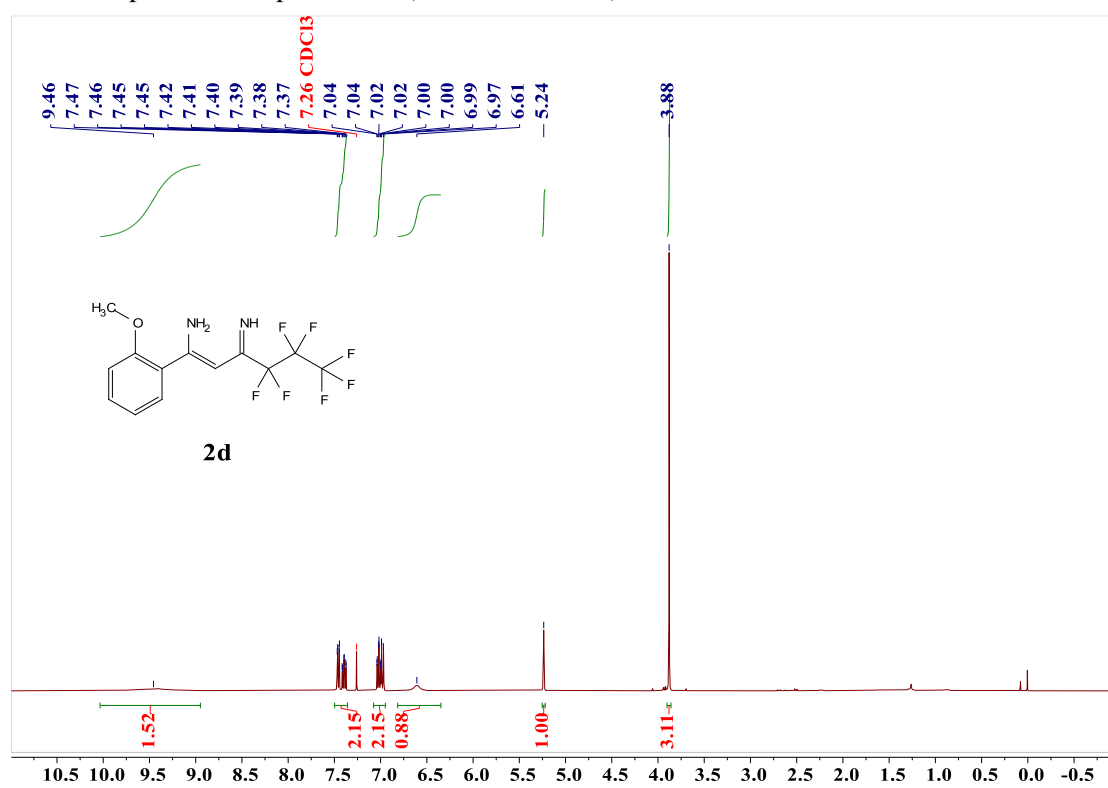



$^{19}\text{F}$  NMR spectra of the product **2d** (376 MHz,  $\text{CDCl}_3$ )

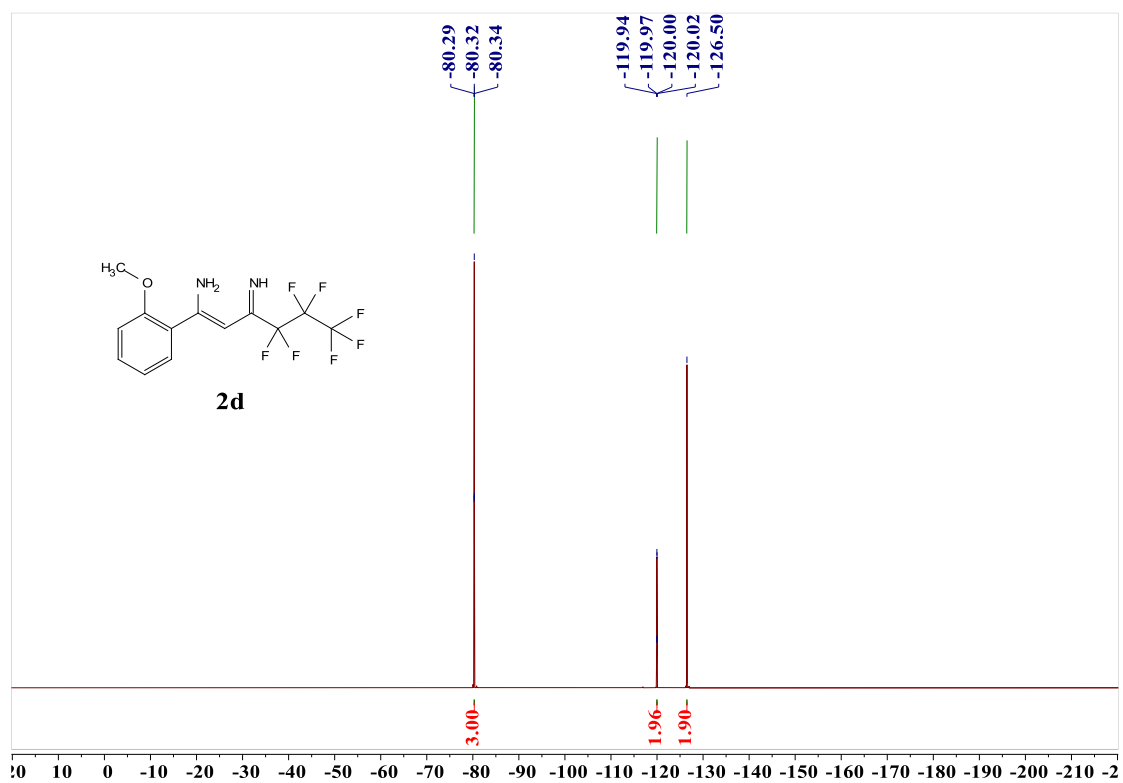

$^{13}\text{C}$  NMR spectra of the product **2d** (100 MHz,  $\text{CDCl}_3$ )

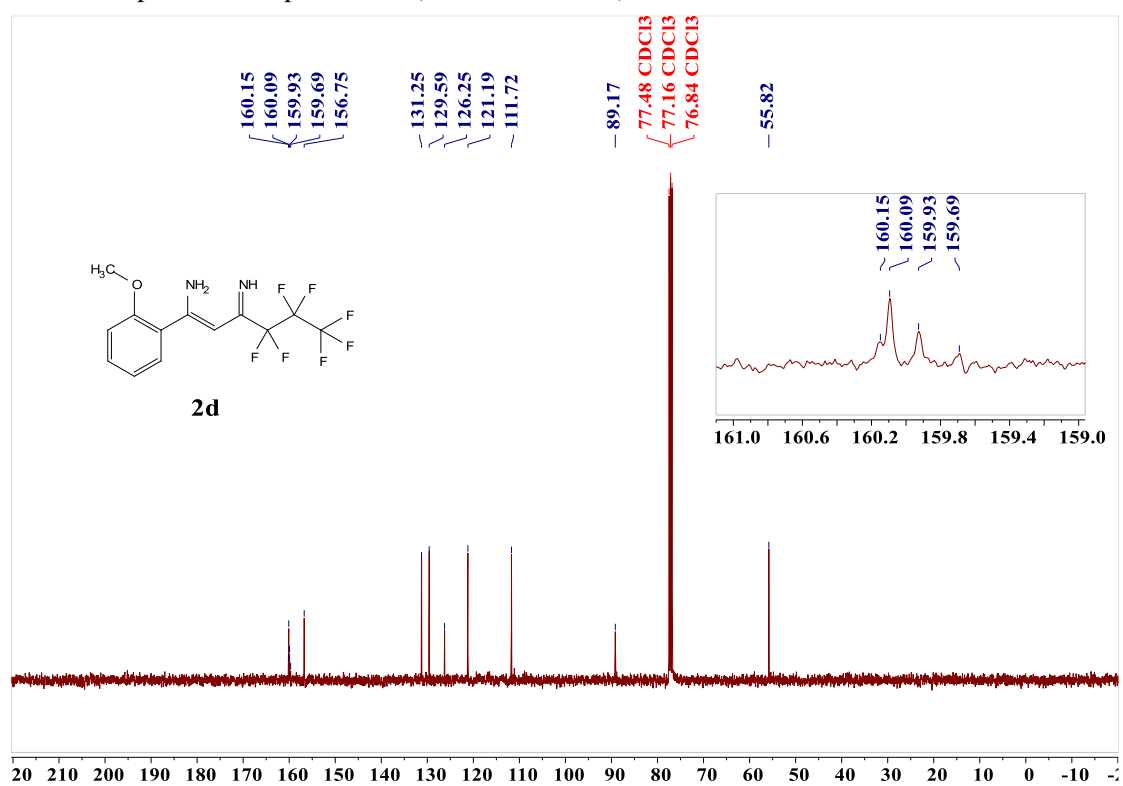

$^1\text{H}$  NMR spectra of the product **2e** (400 MHz,  $\text{CDCl}_3$ )

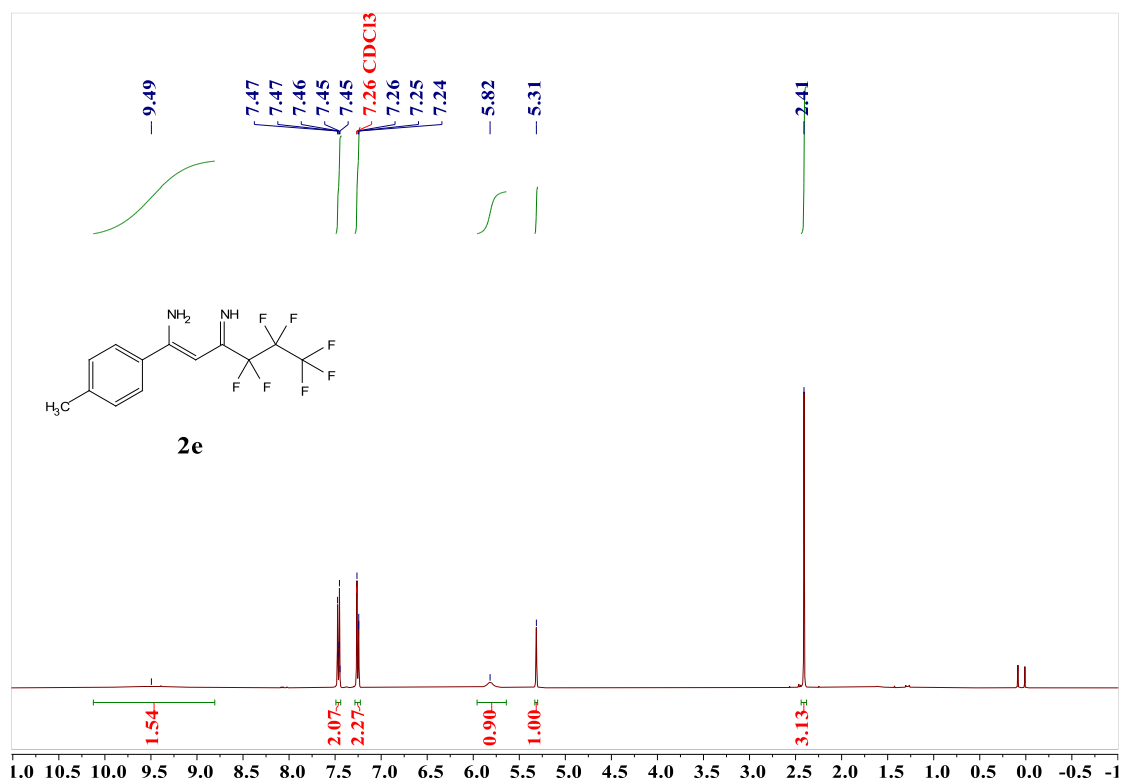

$^{19}\text{F}$  NMR spectra of the product **2e** (376 MHz,  $\text{CDCl}_3$ )

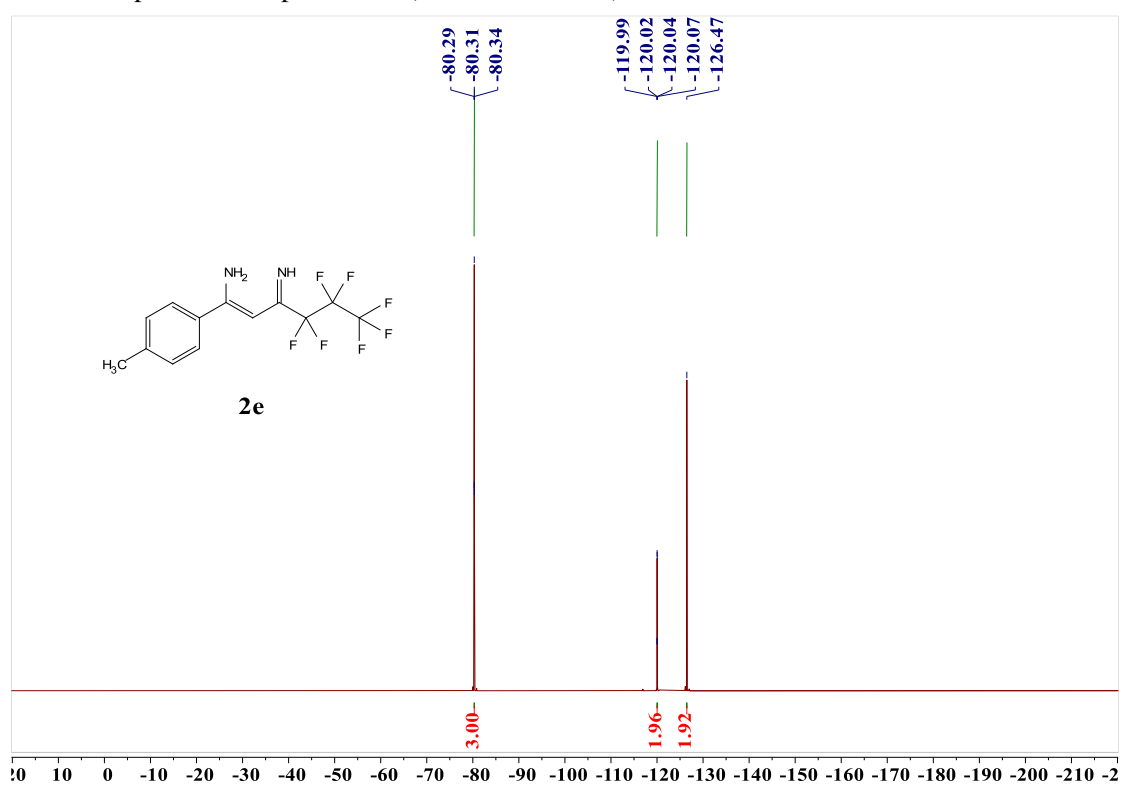

$^{13}\text{C}$  NMR spectra of the product **2e** (100 MHz,  $\text{CDCl}_3$ )

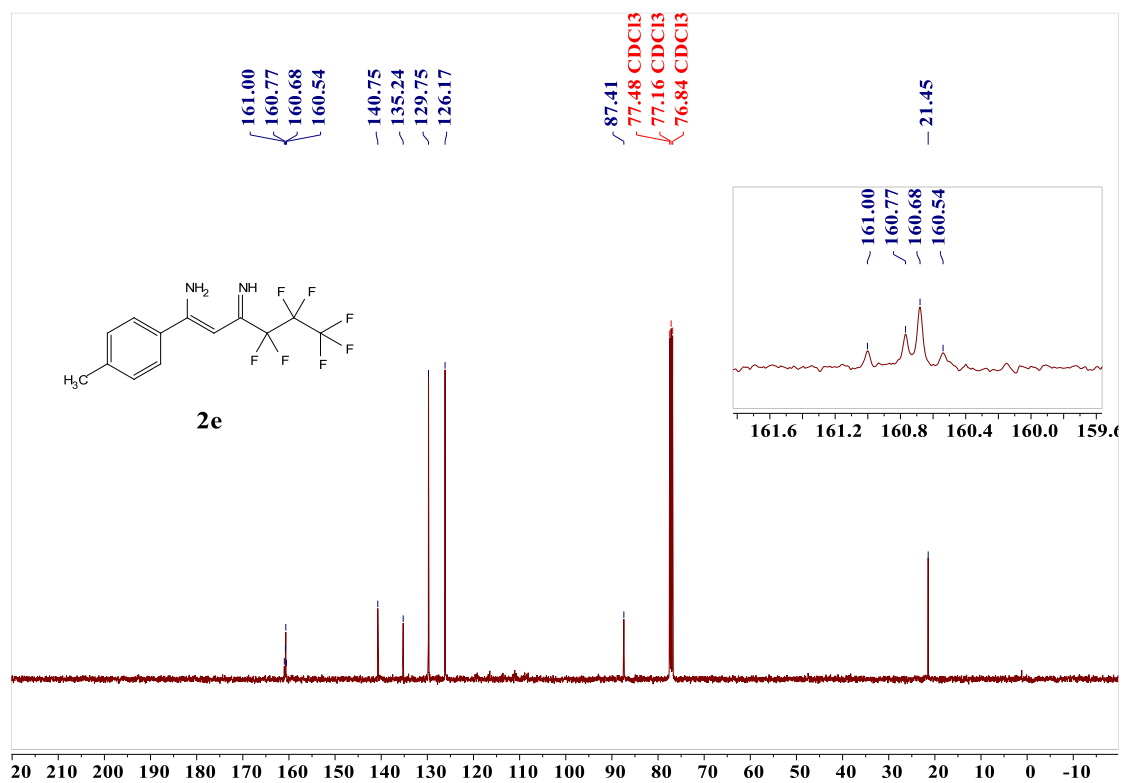

$^1\text{H}$  NMR spectra of the product **2f** (400 MHz,  $\text{CDCl}_3$ )

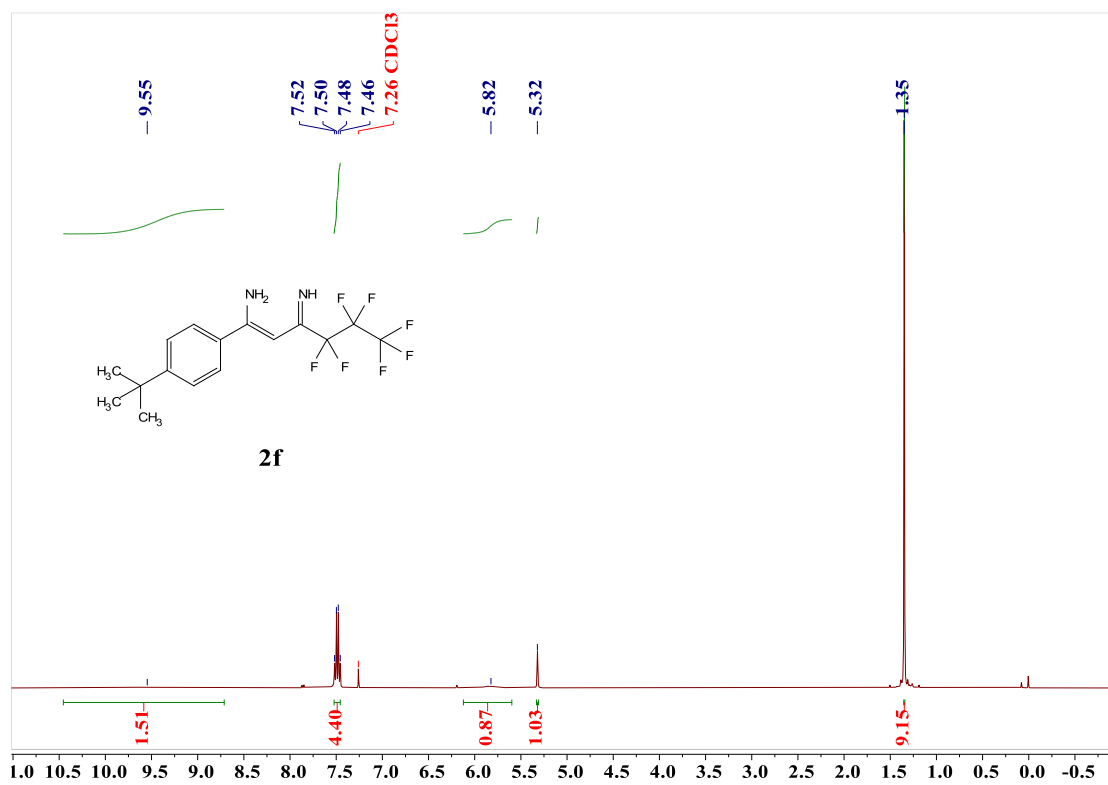

$^{19}\text{F}$  NMR spectra of the product **2f** (376 MHz,  $\text{CDCl}_3$ )

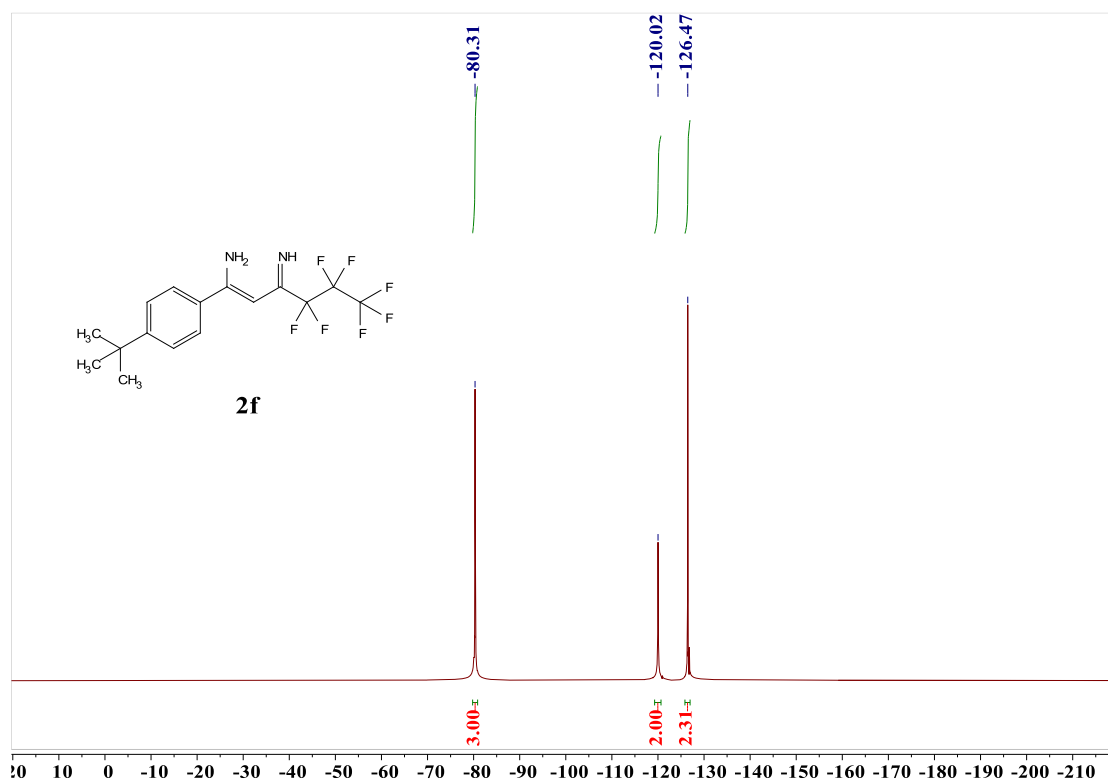

$^{13}\text{C}$  NMR spectra of the product **2f** (100 MHz,  $\text{CDCl}_3$ )

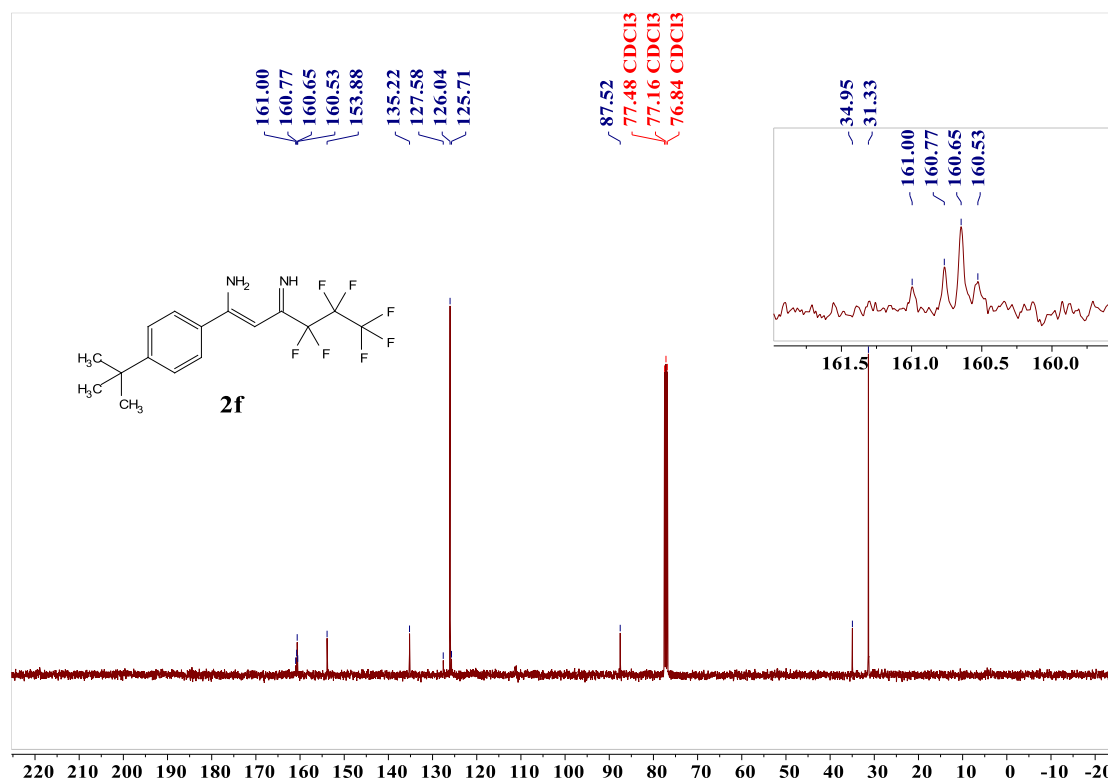

$^1\text{H}$  NMR spectra of the product **2g** (400 MHz,  $\text{CDCl}_3$ )

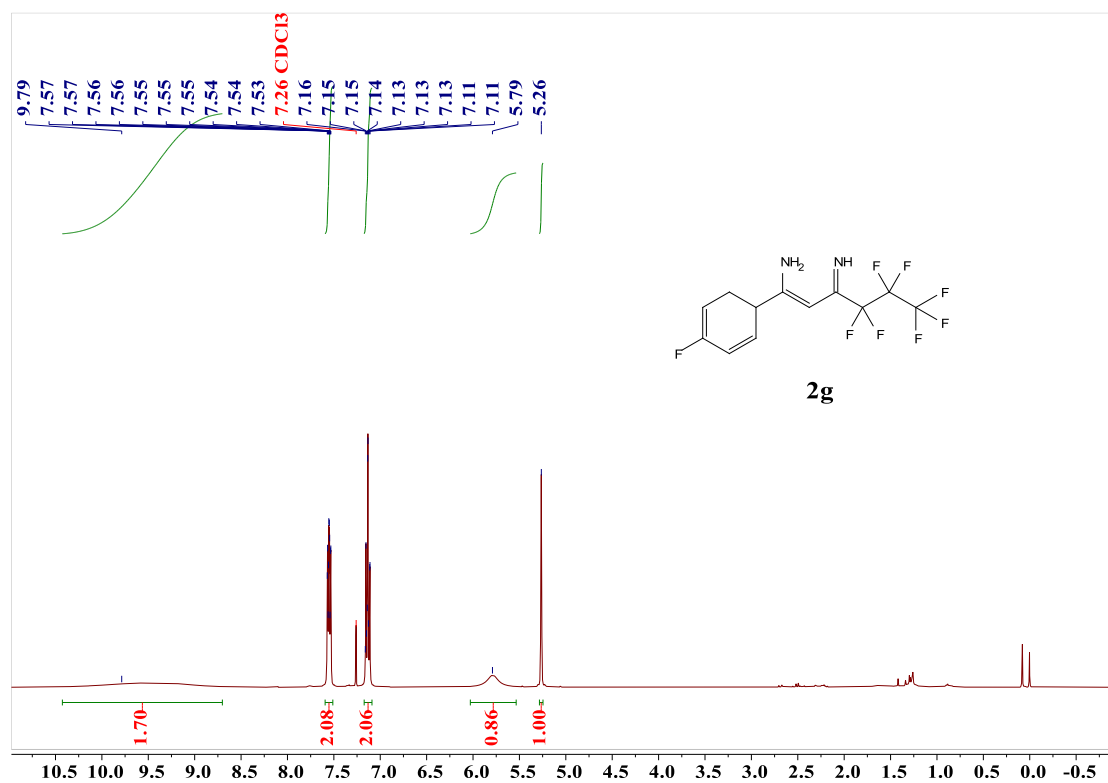

$^{13}\text{C}$  NMR spectra of the product **2g** (100 MHz,  $\text{CDCl}_3$ )

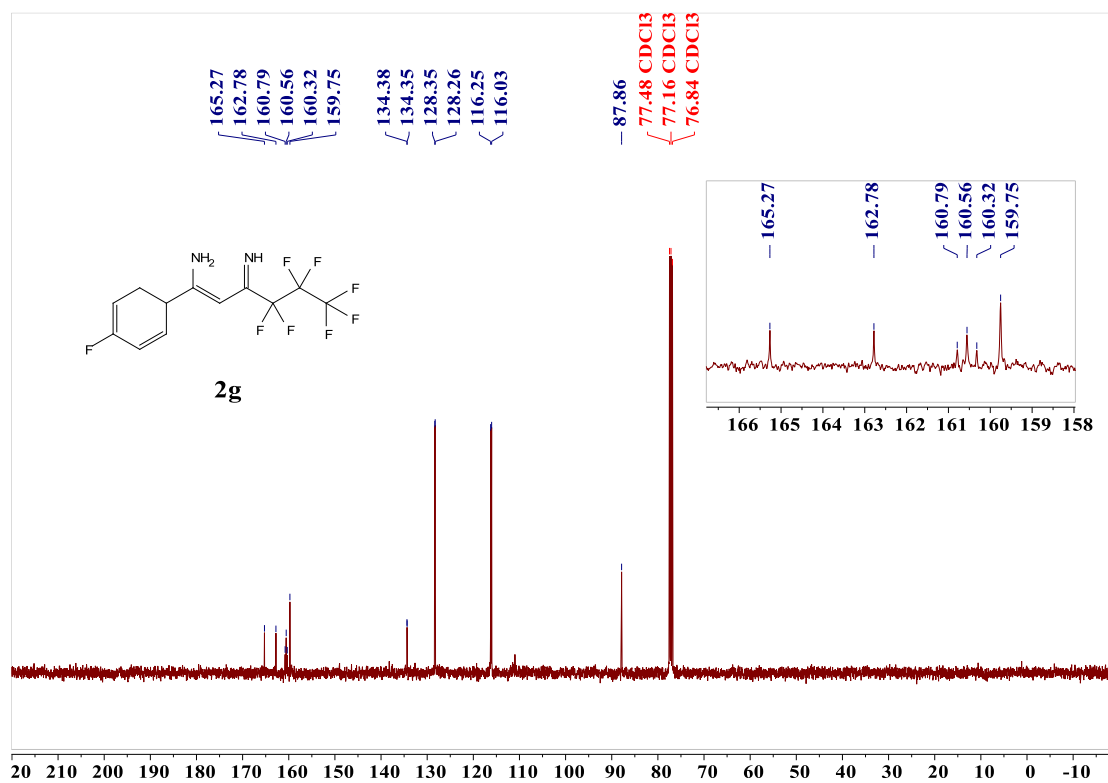

$^1\text{H}$  NMR spectra of the product **2h** (400 MHz,  $\text{CDCl}_3$ )

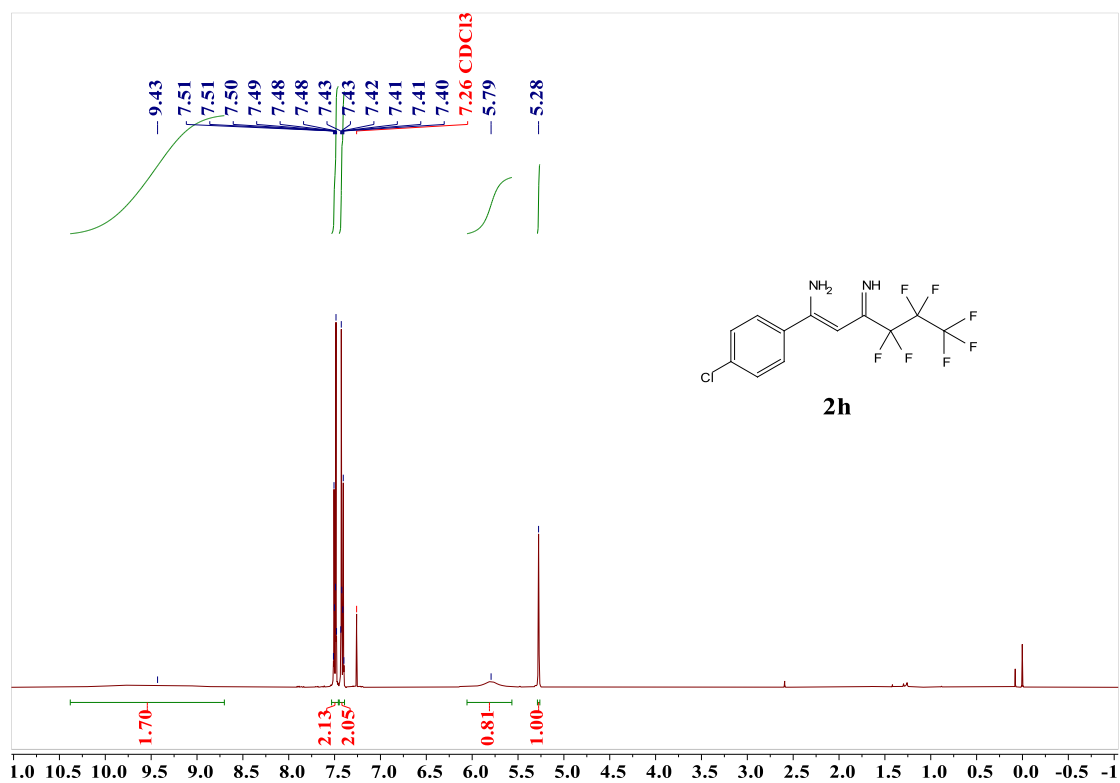

$^{19}\text{F}$  NMR spectra of the product **2h** (376 MHz,  $\text{CDCl}_3$ )

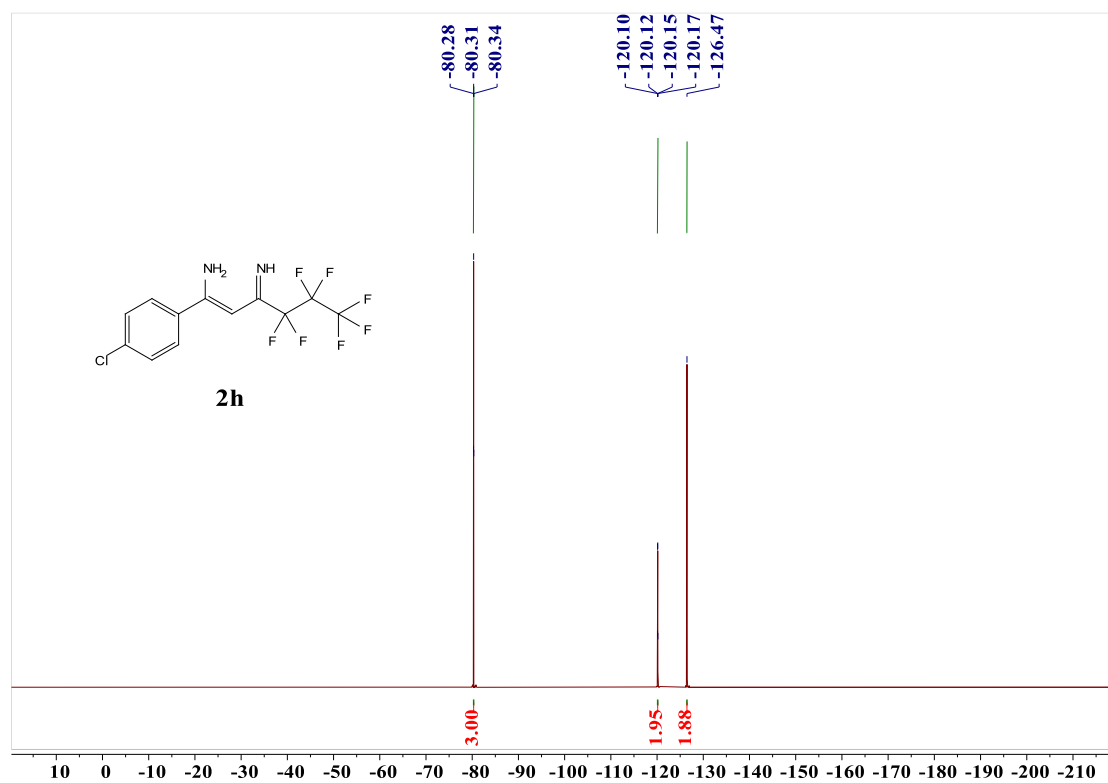

$^{13}\text{C}$  NMR spectra of the product **2h** (100 MHz,  $\text{CDCl}_3$ )

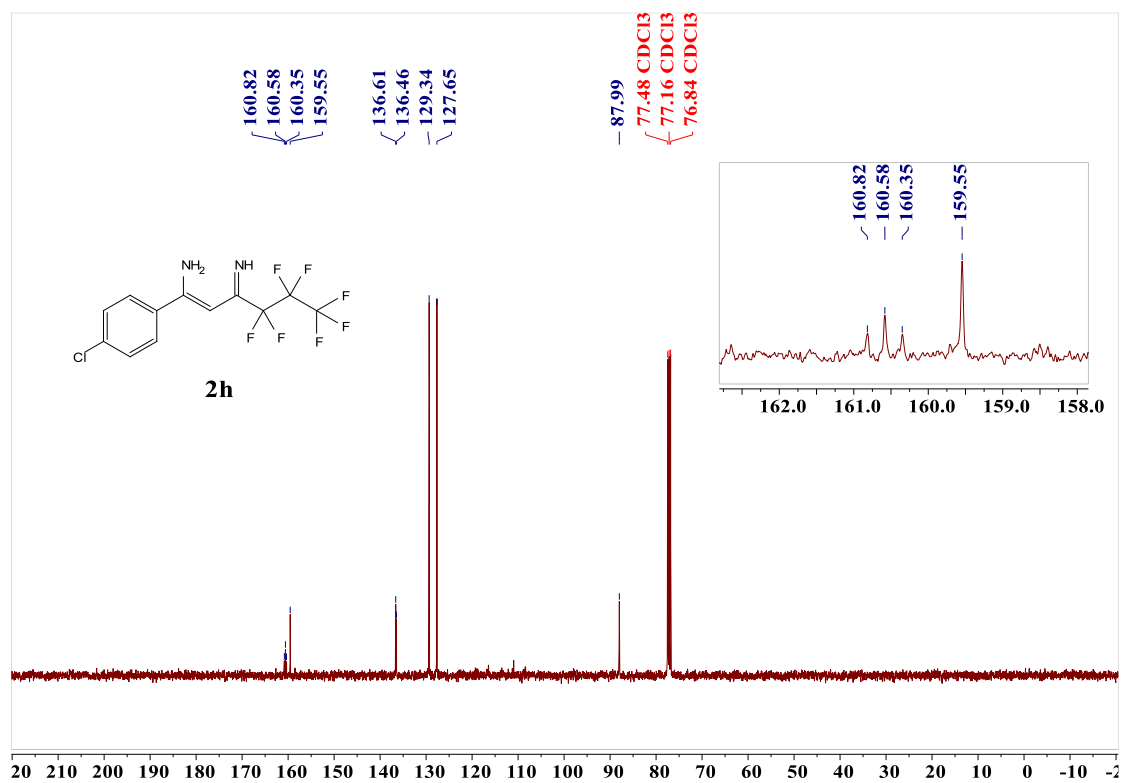

$^1\text{H}$  NMR spectra of the product **2i** (400 MHz,  $\text{CDCl}_3$ )

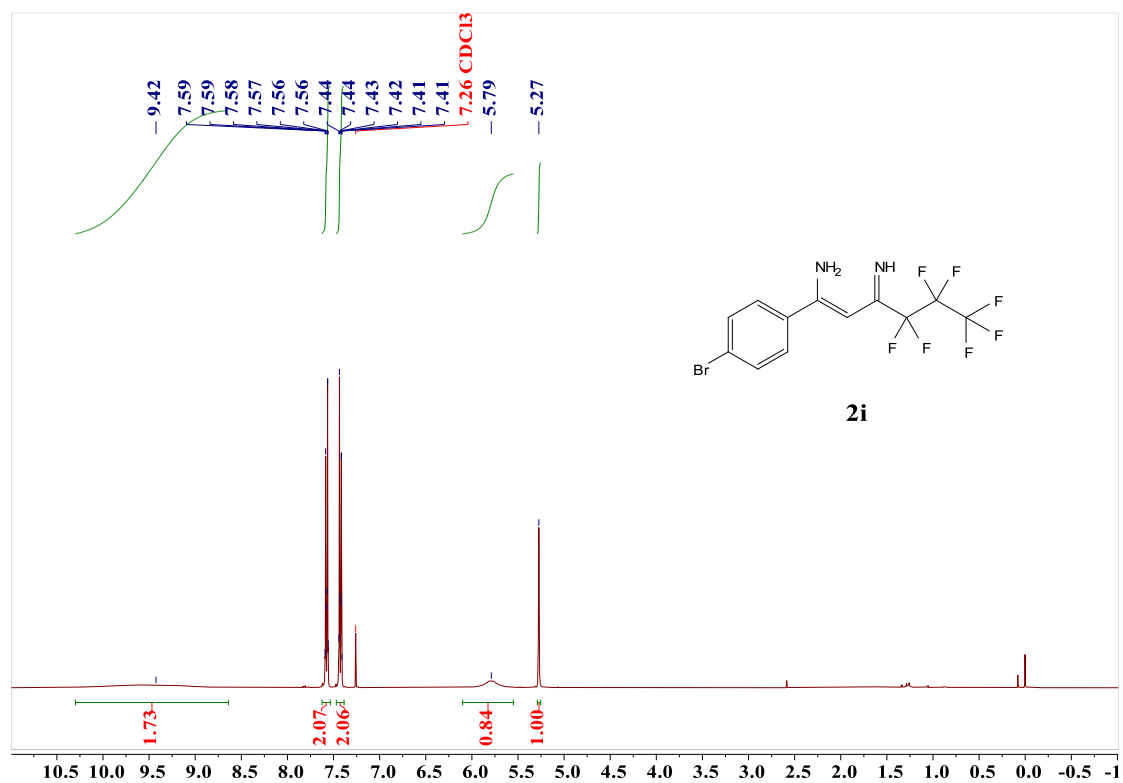

$^{19}\text{F}$  NMR spectra of the product **2i** (376 MHz,  $\text{CDCl}_3$ )

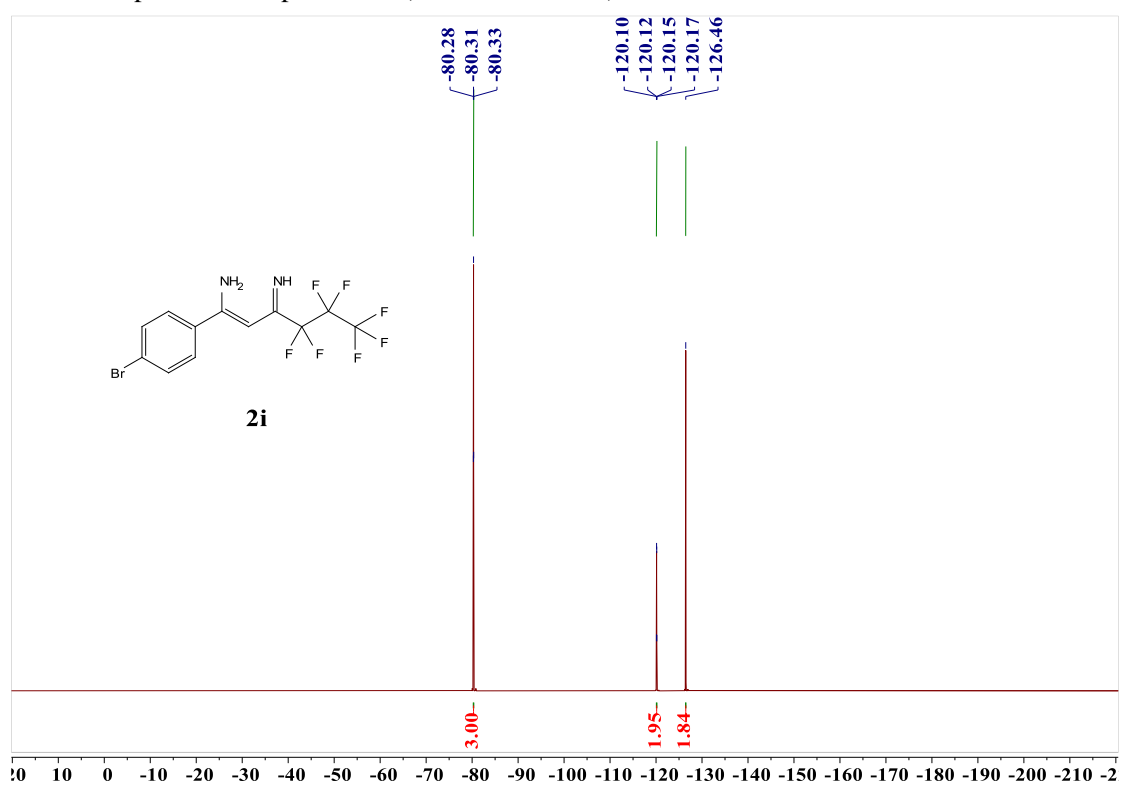



$^{13}\text{C}$  NMR spectra of the product **2i** (100 MHz,  $\text{CDCl}_3$ )

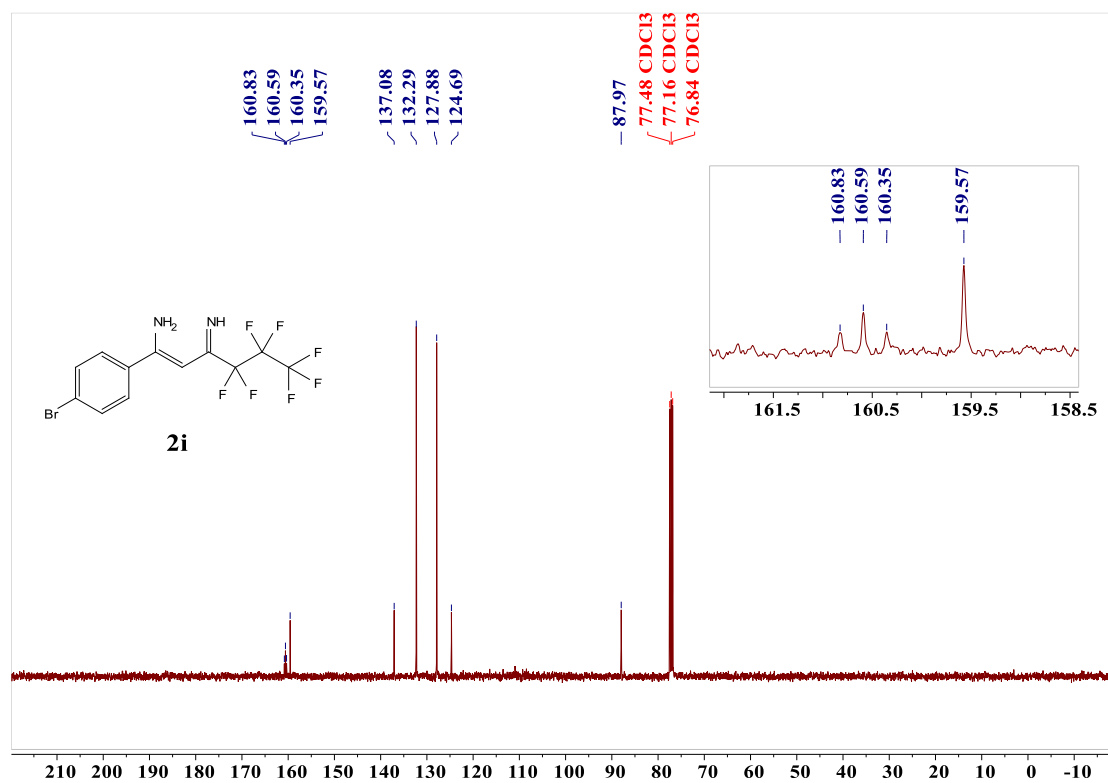

$^1\text{H}$  NMR spectra of the product **2j** (400 MHz,  $\text{CDCl}_3$ )

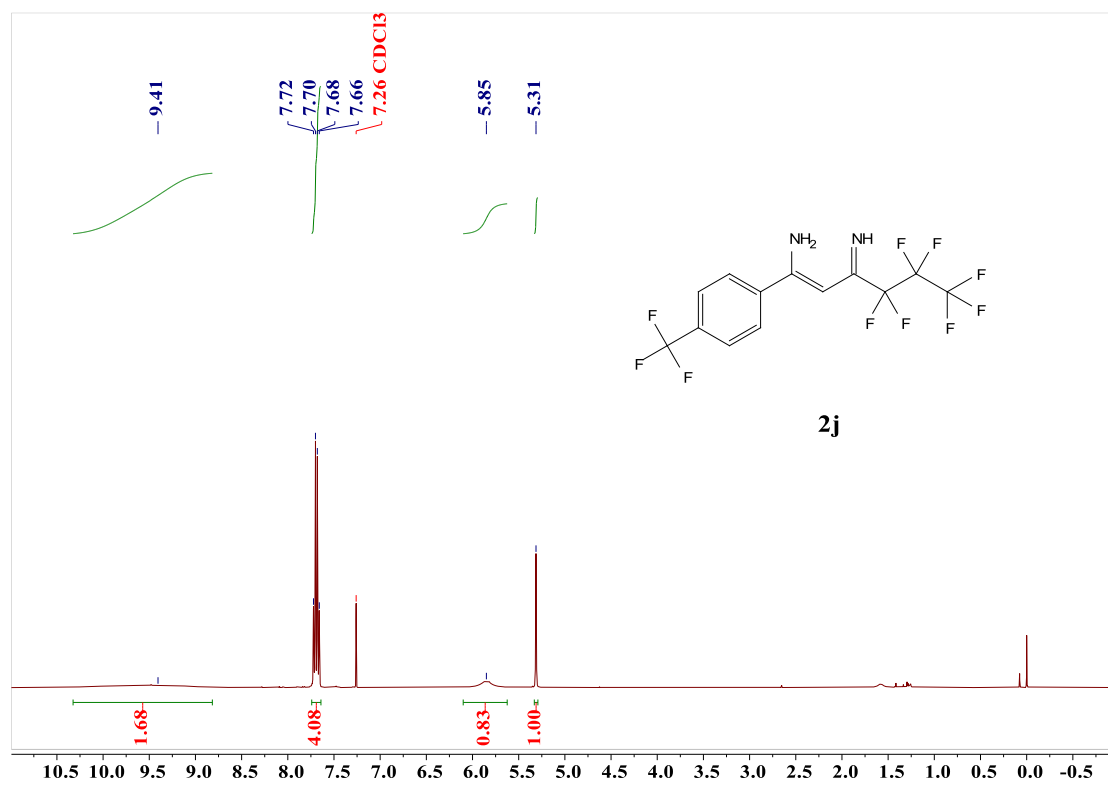

$^{19}\text{F}$  NMR spectra of the product **2j** (376 MHz,  $\text{CDCl}_3$ )

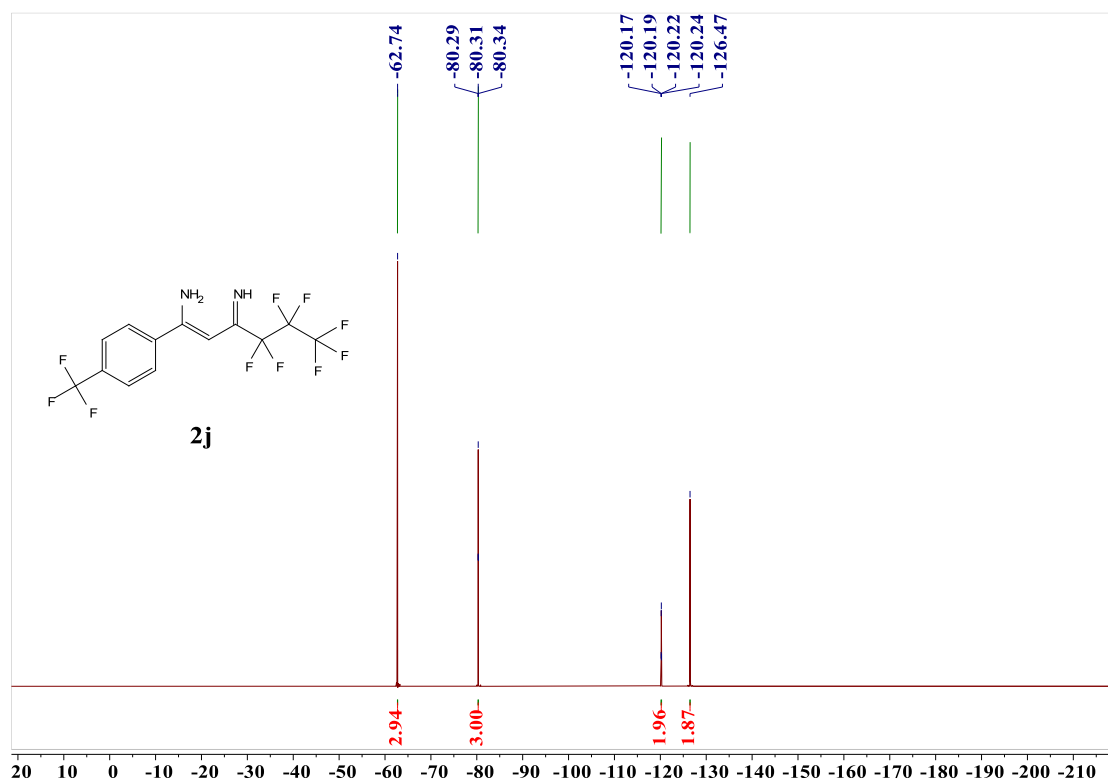

$^{13}\text{C}$  NMR spectra of the product **2j** (100 MHz,  $\text{CDCl}_3$ )

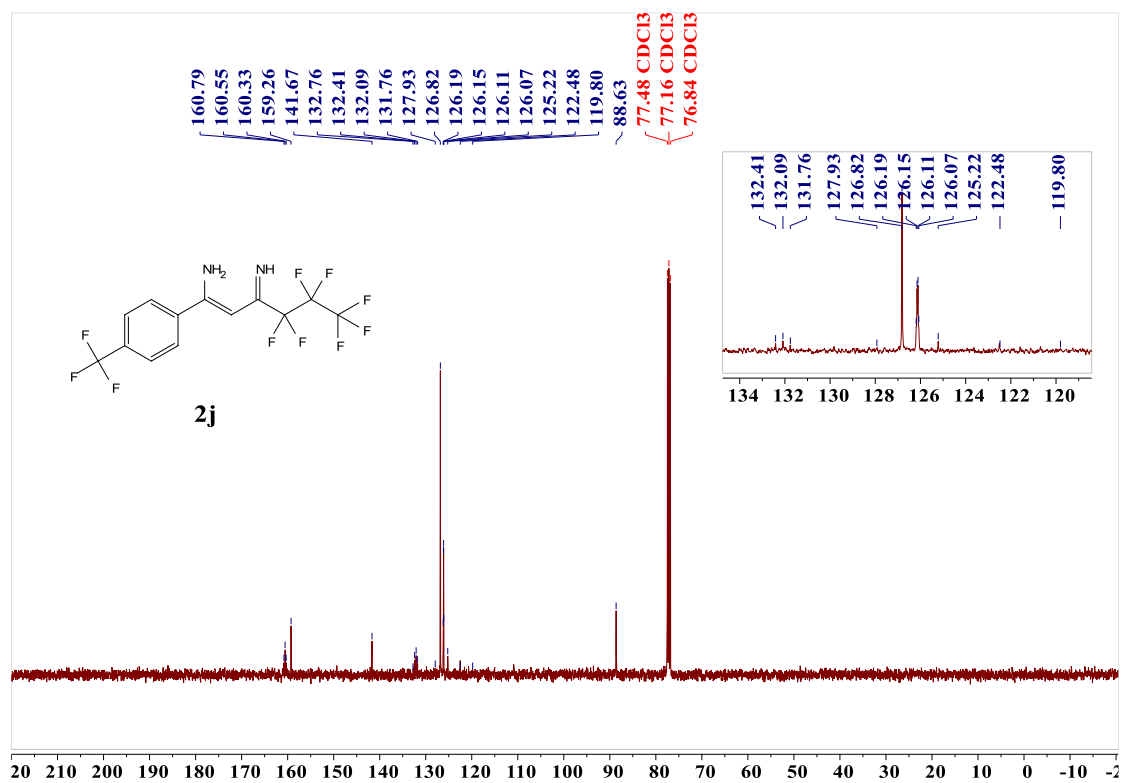

$^1\text{H}$  NMR spectra of the product **2k** (400 MHz,  $\text{CDCl}_3$ )

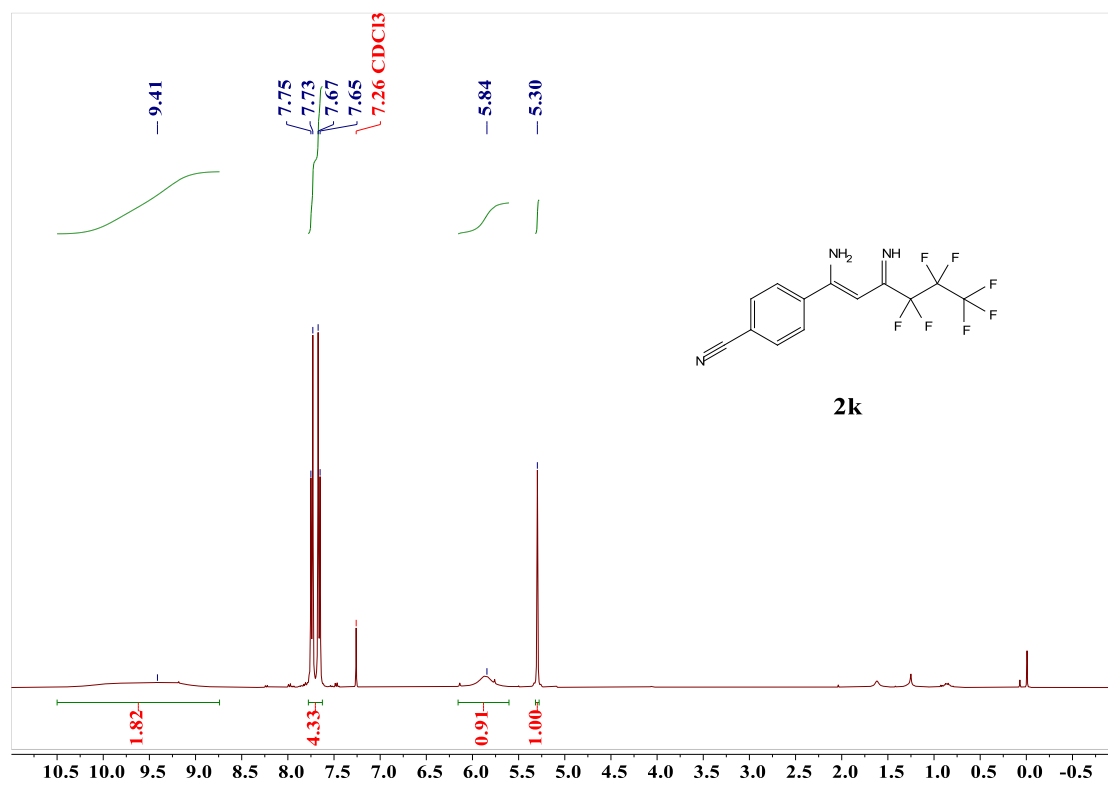

$^{19}\text{F}$  NMR spectra of the product **2k** (376 MHz,  $\text{CDCl}_3$ )

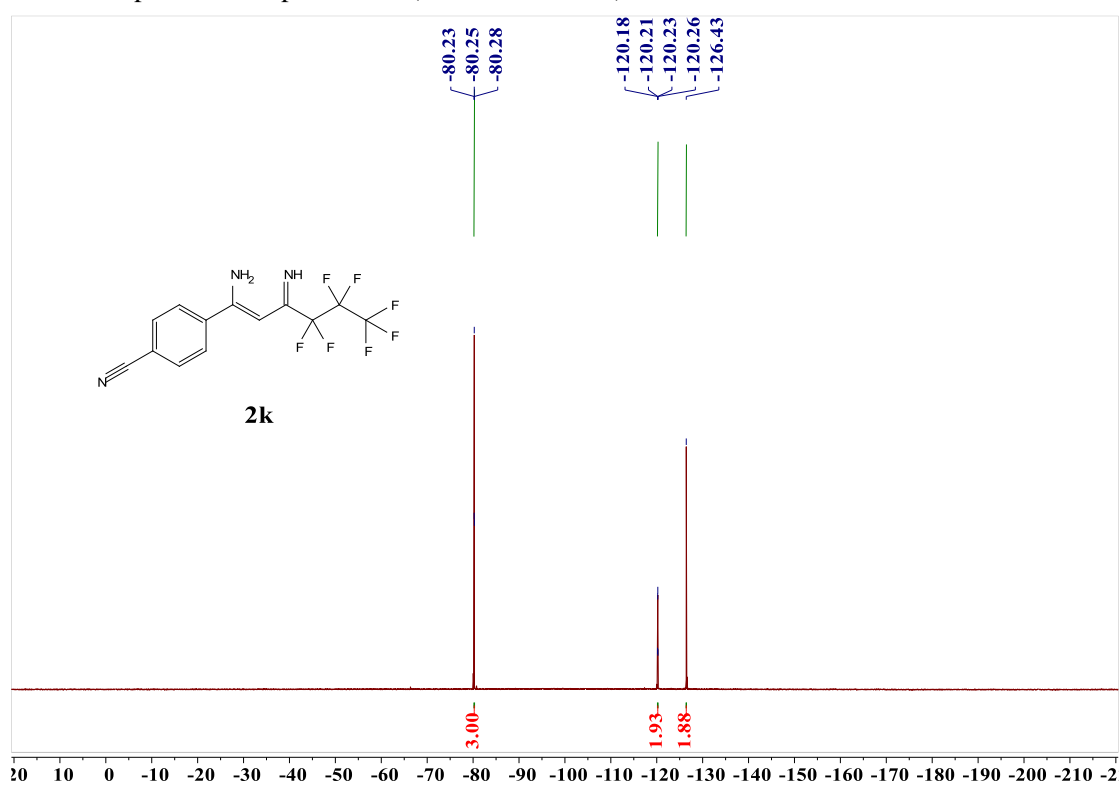

$^{13}\text{C}$  NMR spectra of the product **2k** (100 MHz,  $\text{CDCl}_3$ )

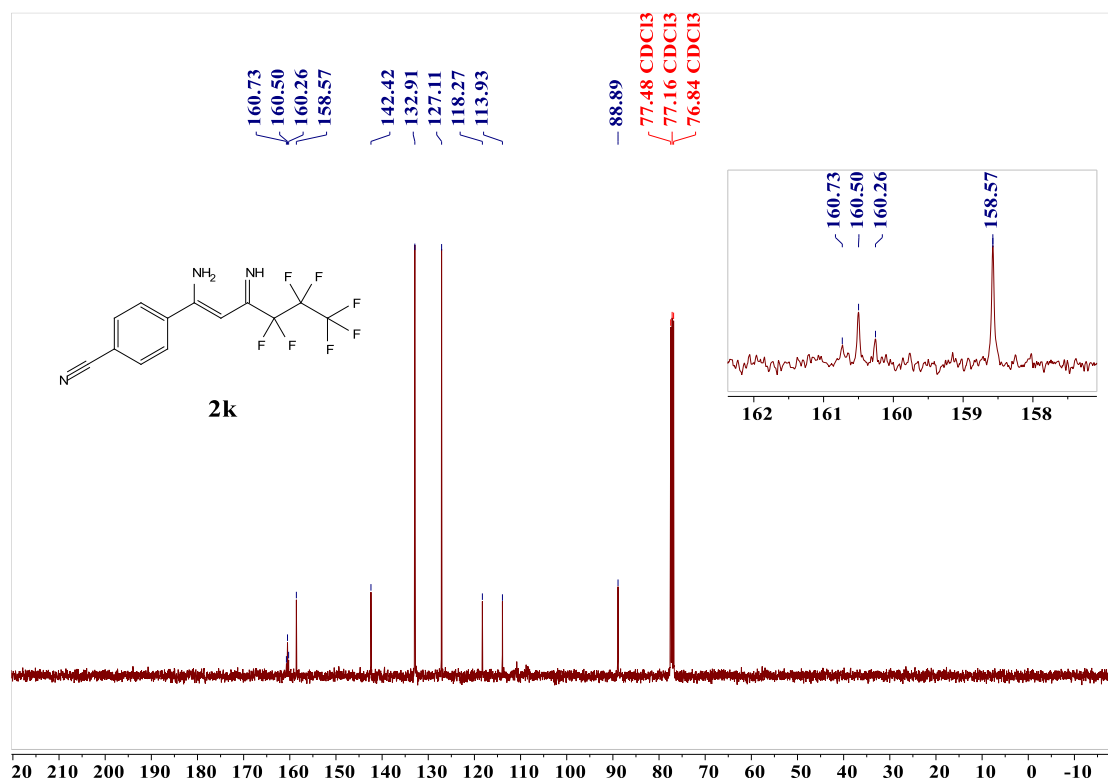

$^1\text{H}$  NMR spectra of the product **2l** (400 MHz,  $\text{CDCl}_3$ )

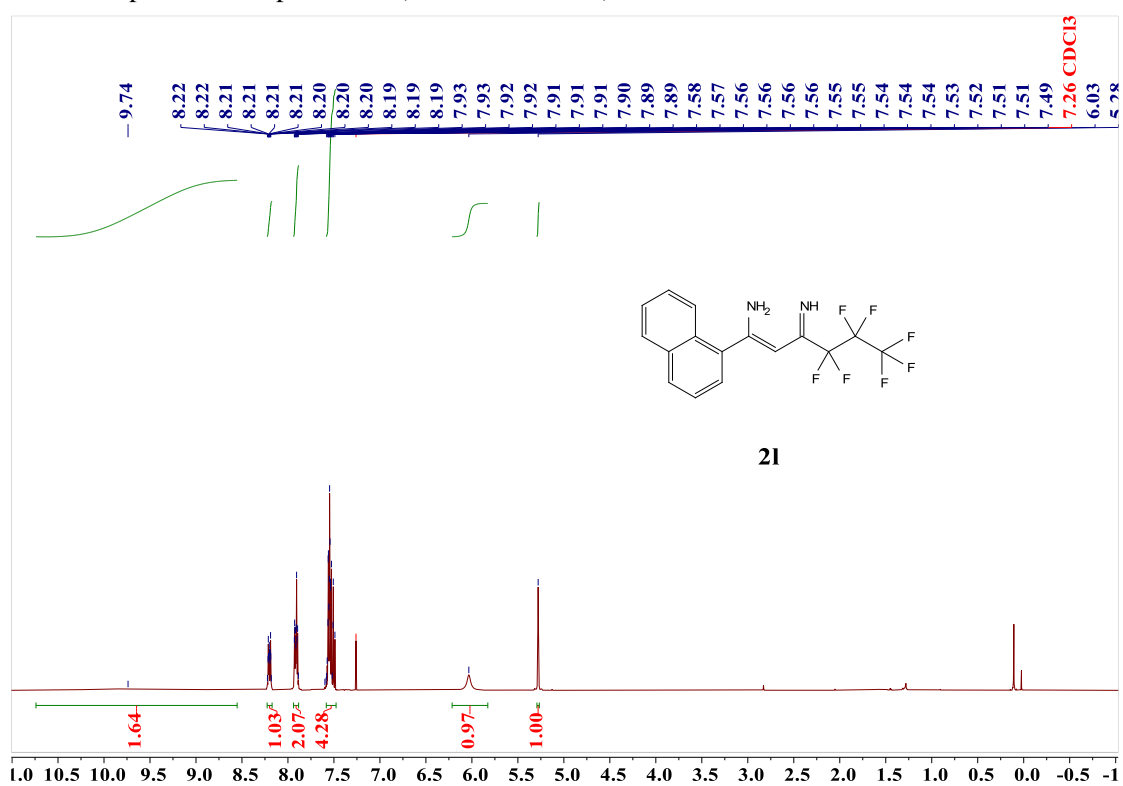

$^{19}\text{F}$  NMR spectra of the product **21** (376 MHz,  $\text{CDCl}_3$ )

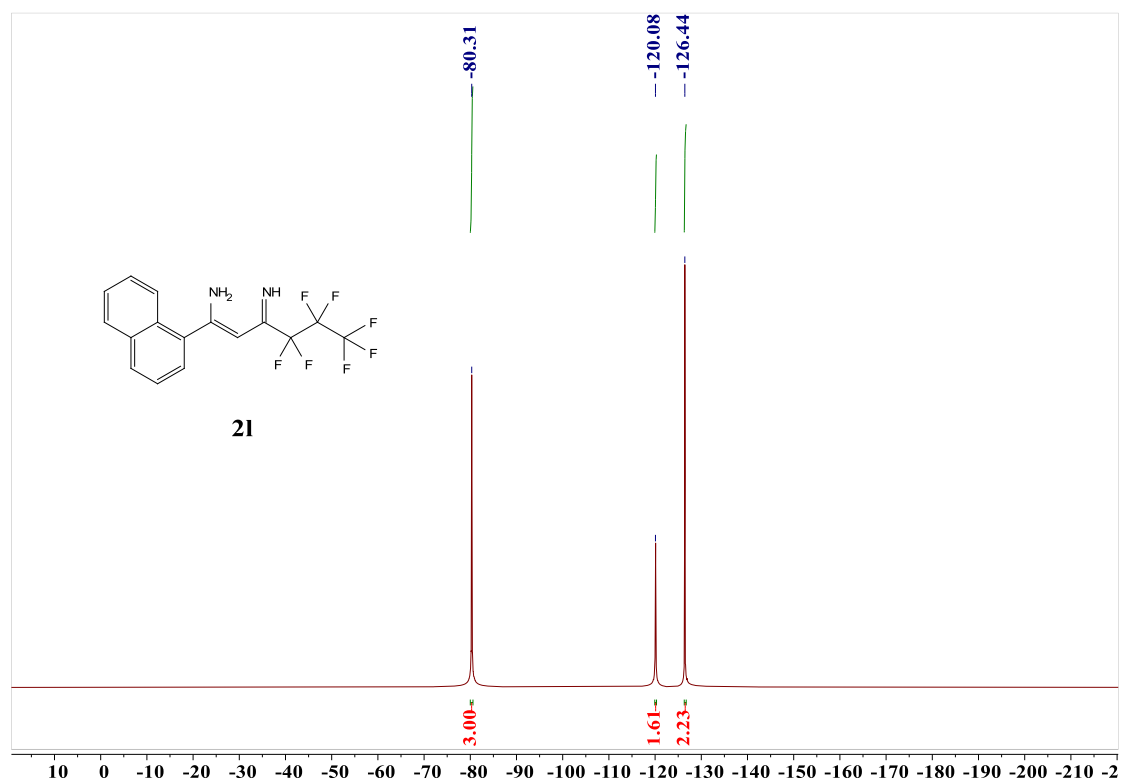

$^{13}\text{C}$  NMR spectra of the product **21** (100 MHz,  $\text{CDCl}_3$ )

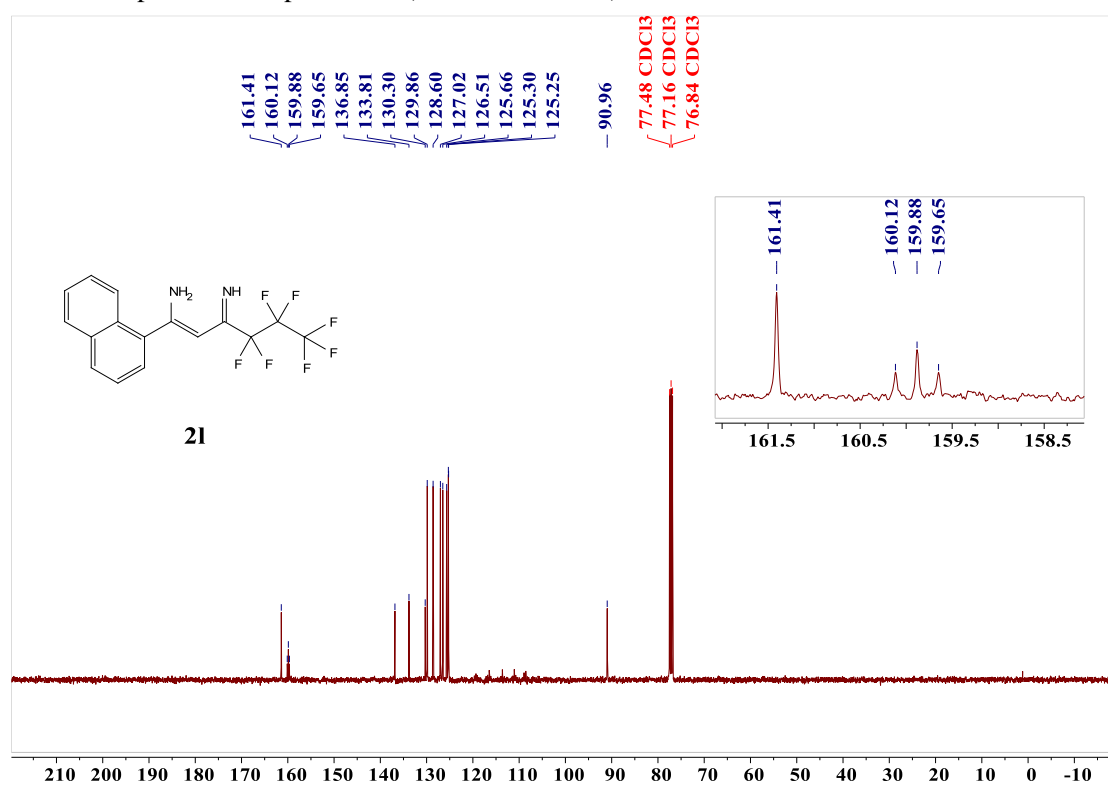

$^1\text{H}$  NMR spectra of the product **2m** (400 MHz,  $\text{CDCl}_3$ )

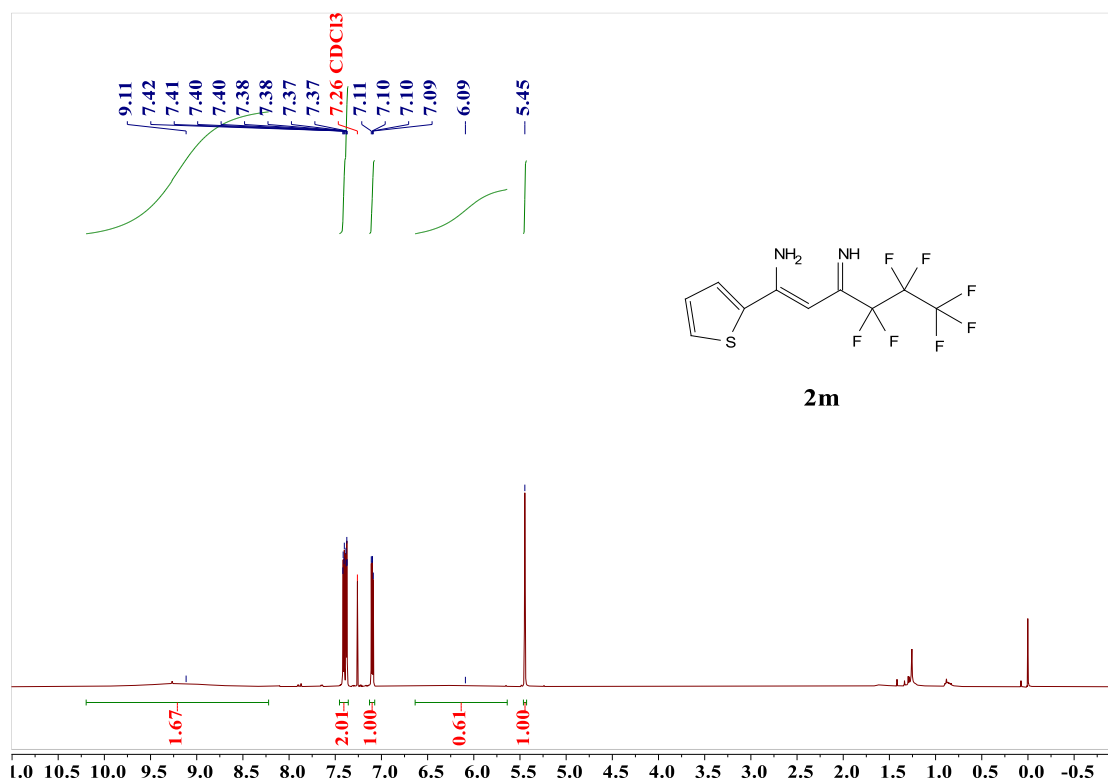

$^{19}\text{F}$  NMR spectra of the product **2m** (376 MHz,  $\text{CDCl}_3$ )

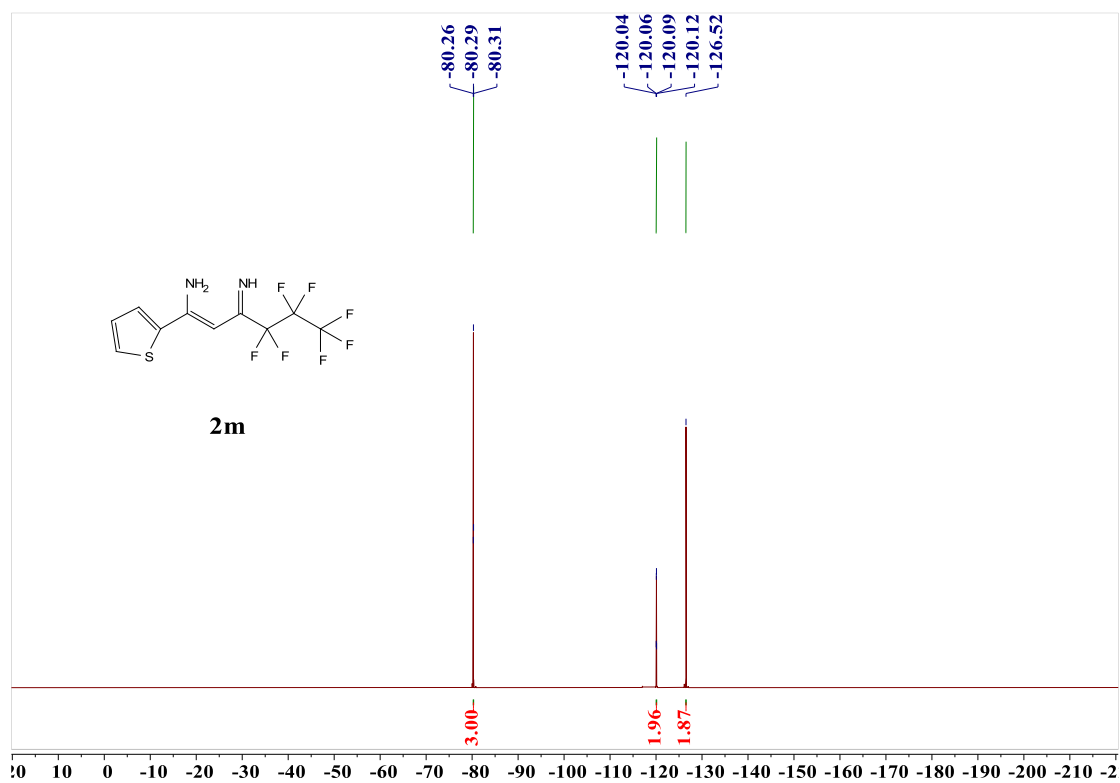

$^{13}\text{C}$  NMR spectra of the product **2m** (100 MHz,  $\text{CDCl}_3$ )

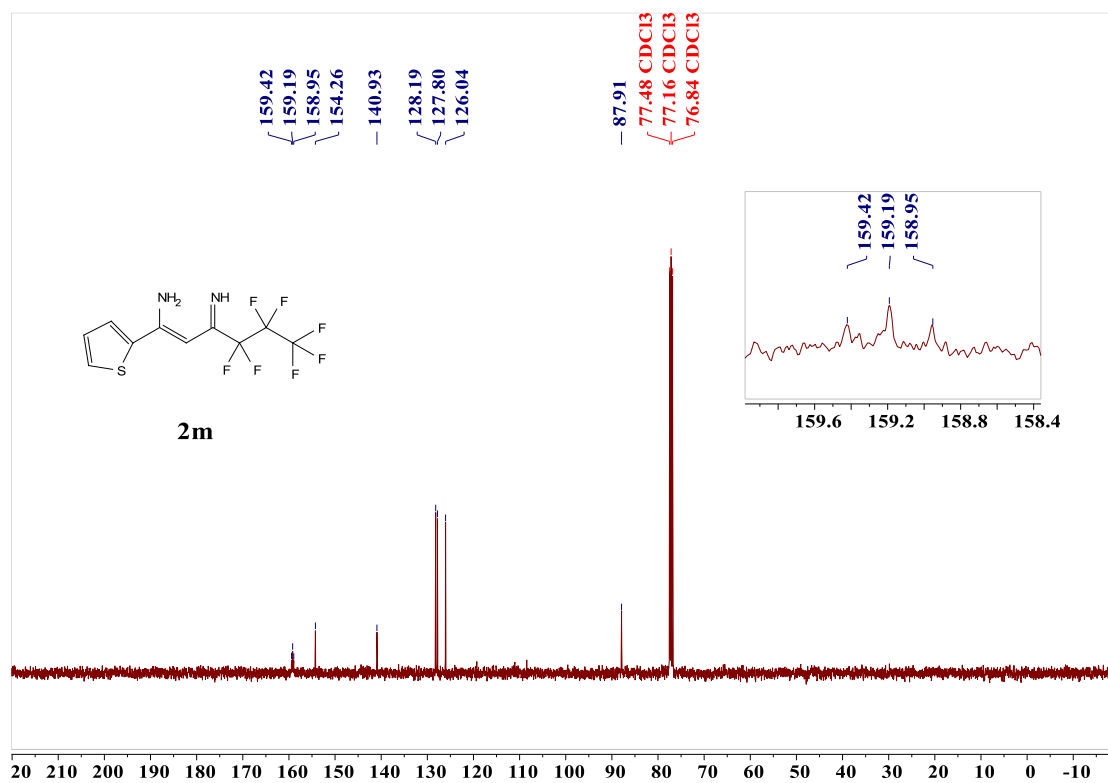

$^1\text{H}$  NMR spectra of the product **2n** (400 MHz,  $\text{CDCl}_3$ )

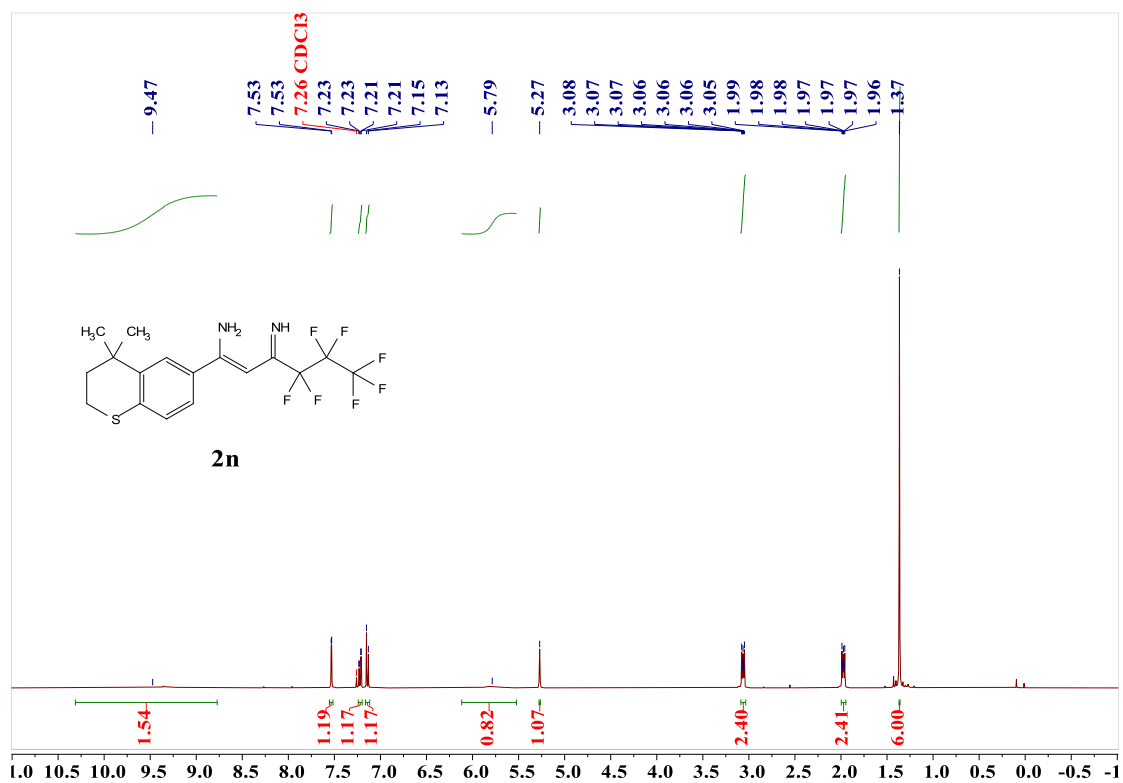

$^{19}\text{F}$  NMR spectra of the product **2n** (376 MHz,  $\text{CDCl}_3$ )

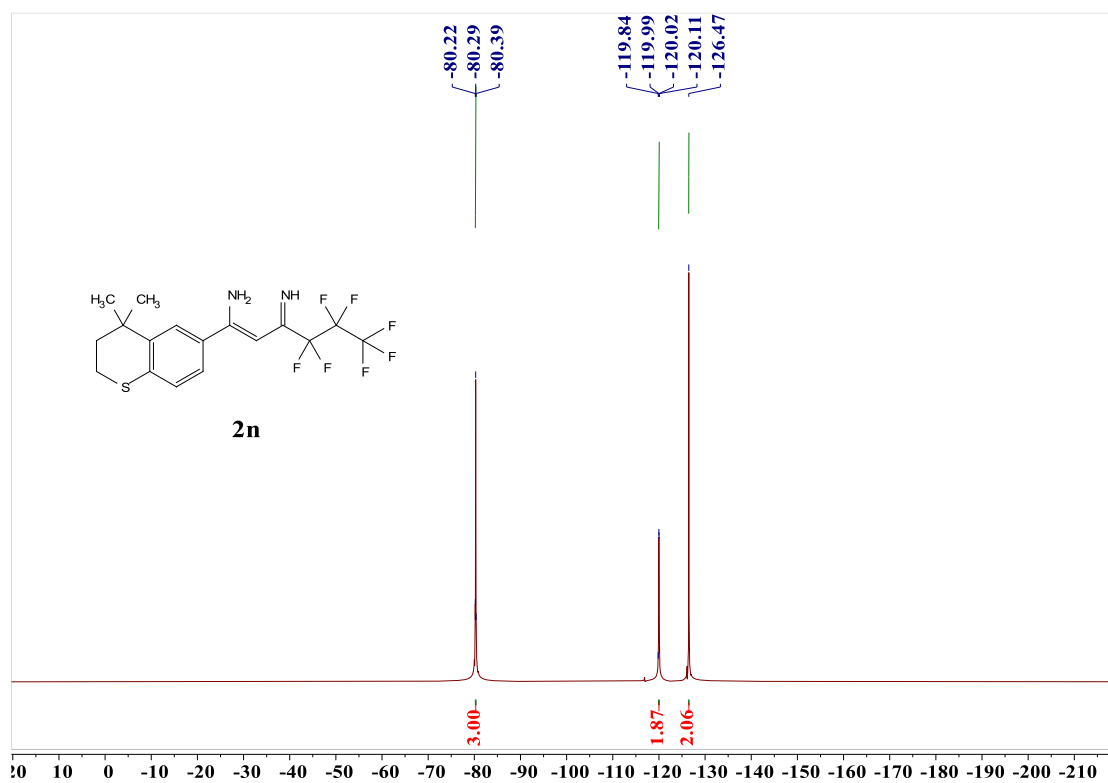

$^{13}\text{C}$  NMR spectra of the product **2n** (100 MHz,  $\text{CDCl}_3$ )

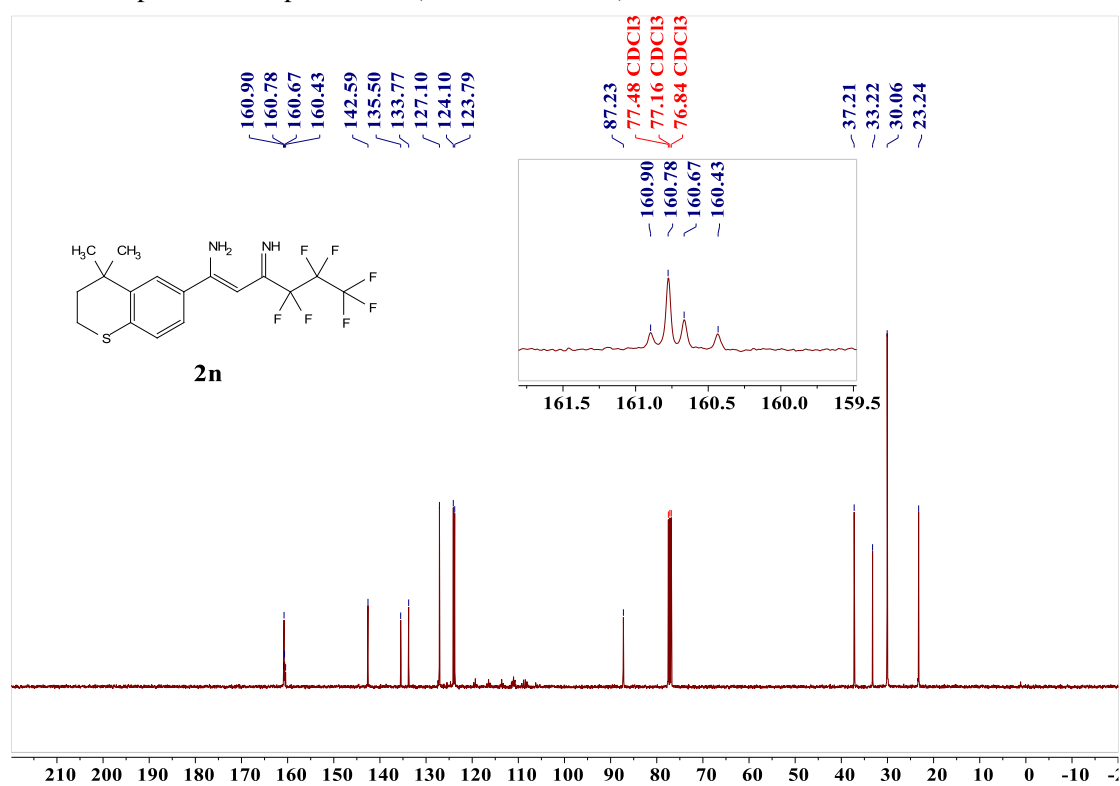



$^1\text{H}$  NMR spectra of the product **2o** (400 MHz,  $\text{CDCl}_3$ )

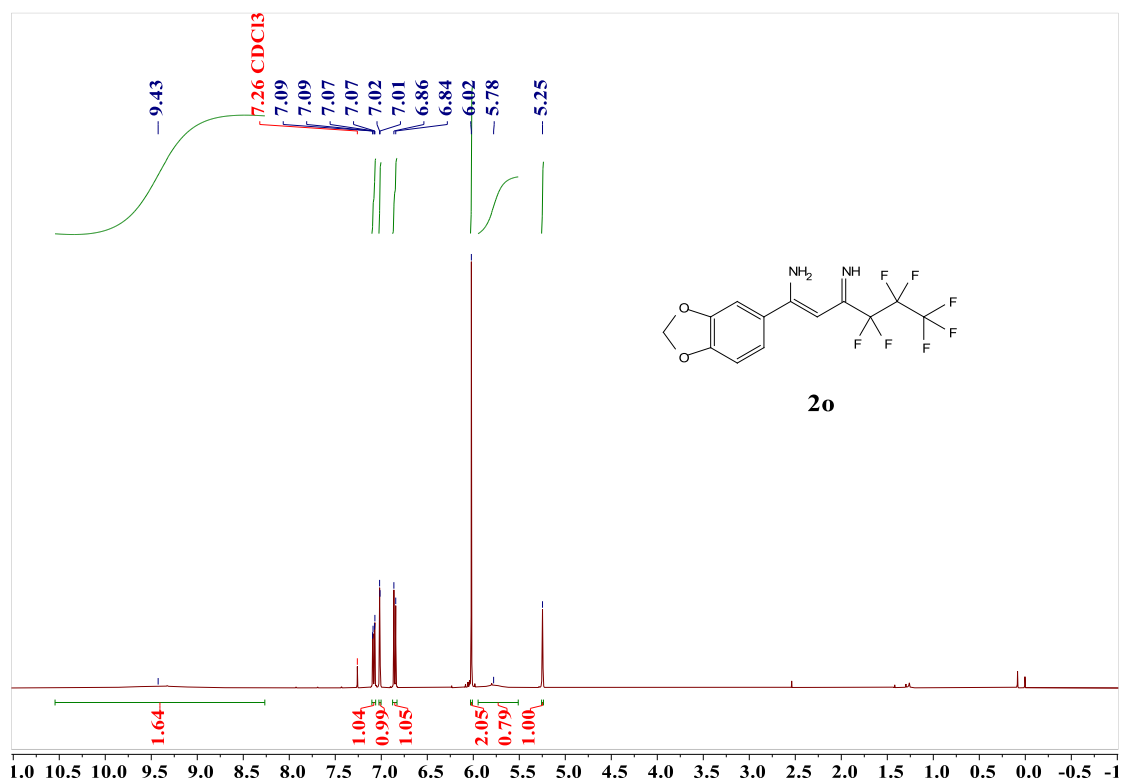

$^{19}\text{F}$  NMR spectra of the product **2o** (376 MHz,  $\text{CDCl}_3$ )

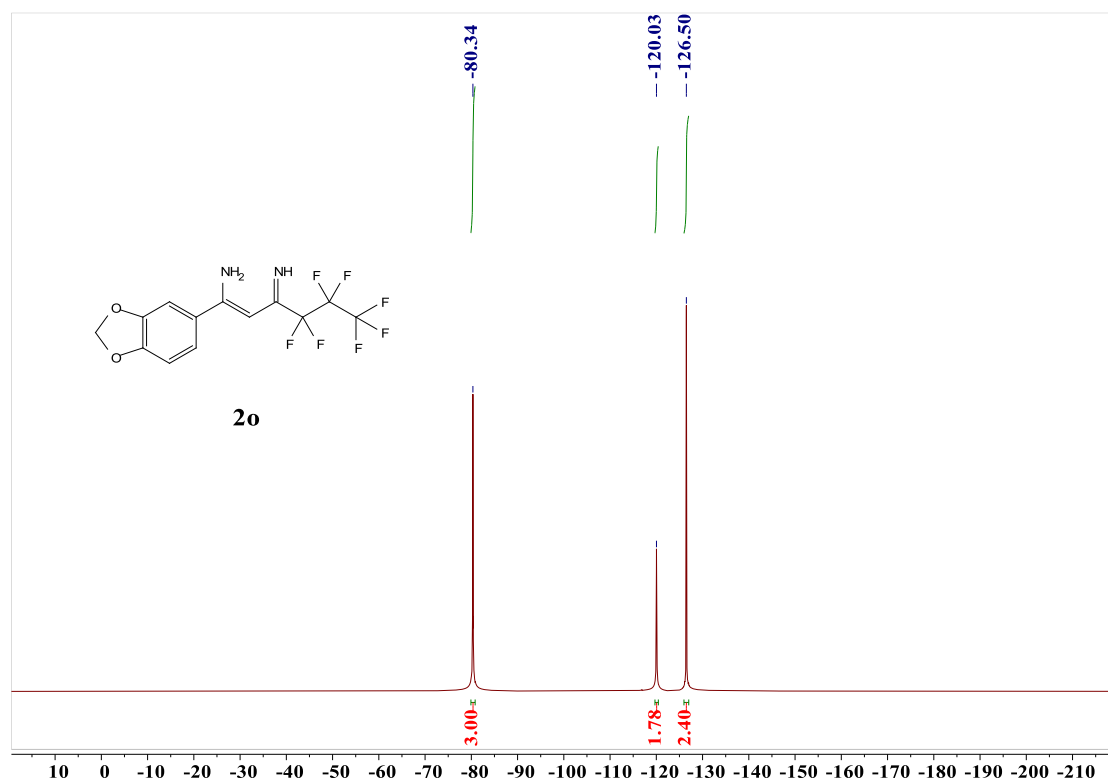

$^{13}\text{C}$  NMR spectra of the product **2o** (100 MHz,  $\text{CDCl}_3$ )

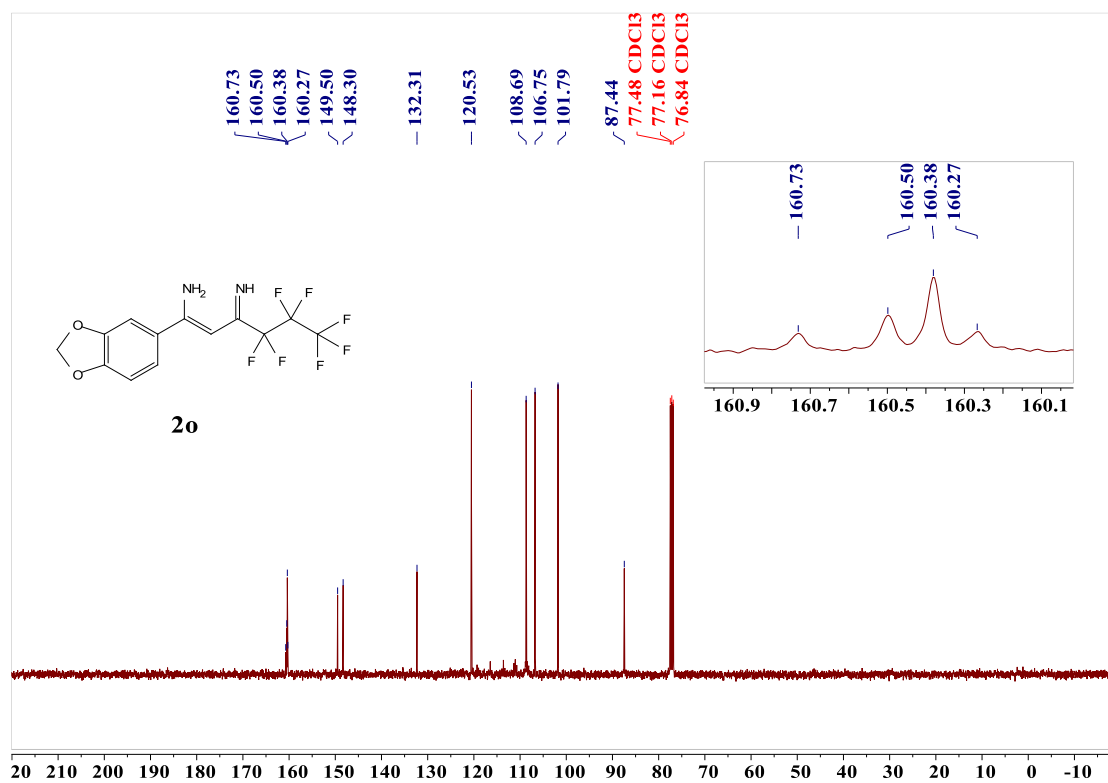

$^1\text{H}$  NMR spectra of the product **2p** (400 MHz,  $\text{CDCl}_3$ )

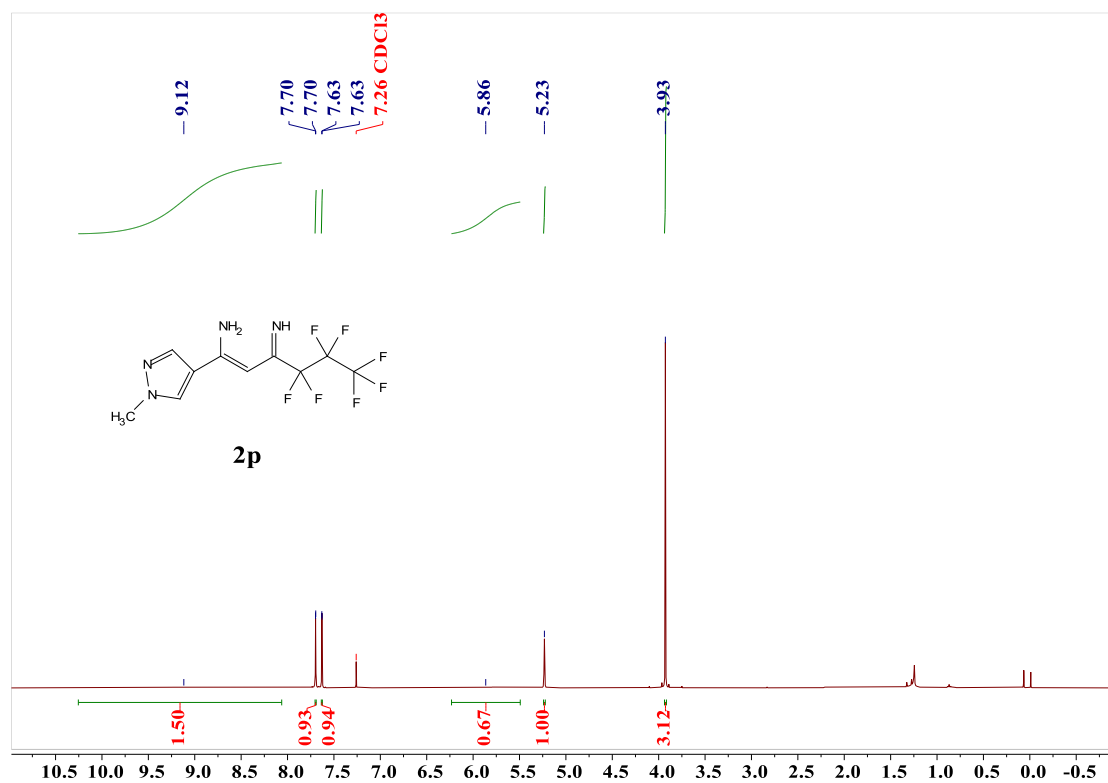

$^{19}\text{F}$  NMR spectra of the product **2p** (376 MHz,  $\text{CDCl}_3$ )

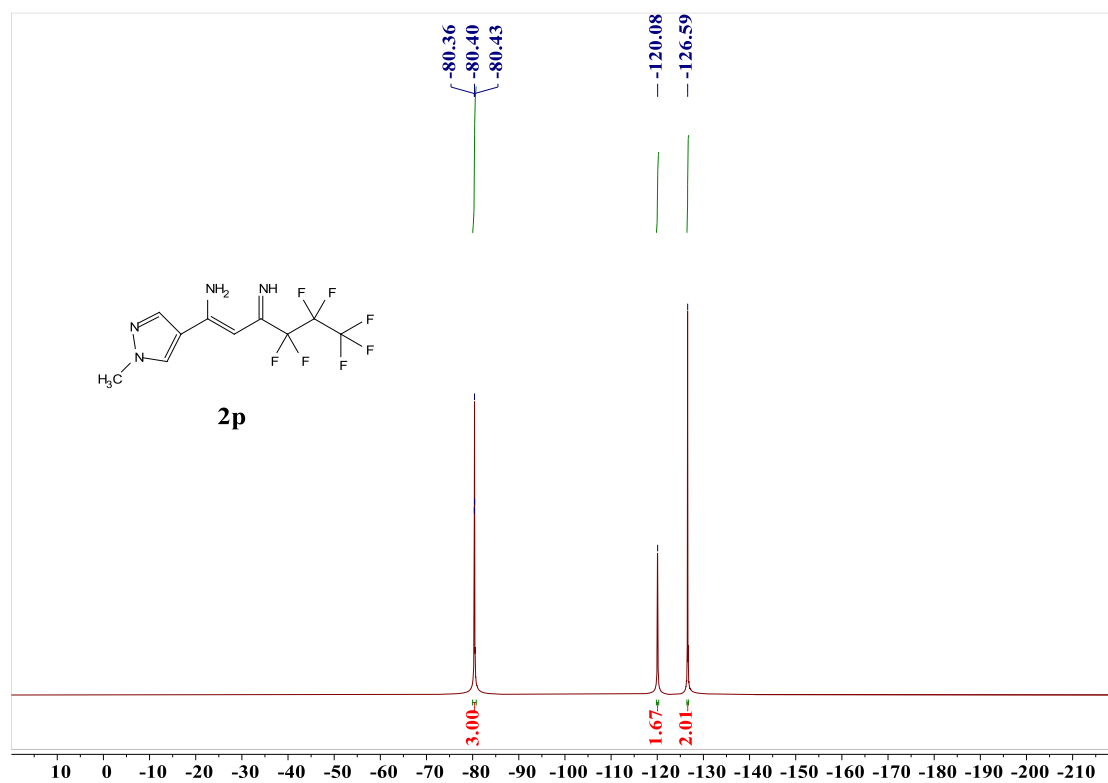

$^{13}\text{C}$  NMR spectra of the product **2p** (100 MHz,  $\text{CDCl}_3$ )

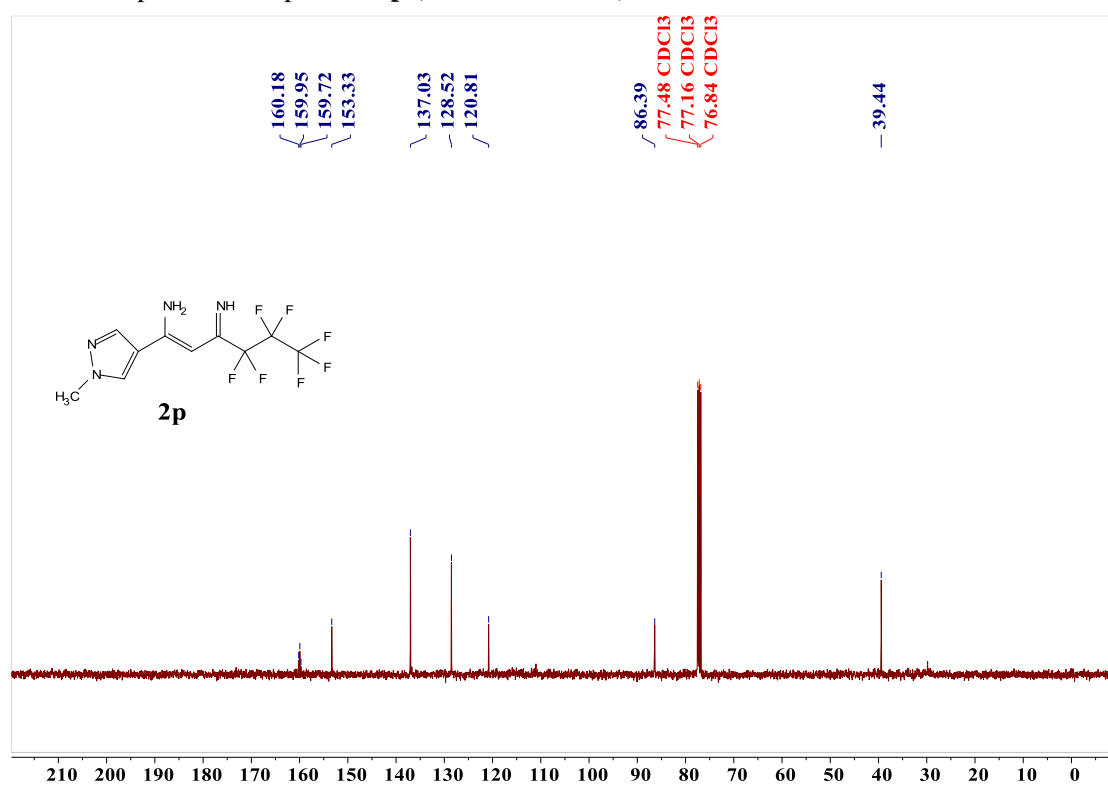

$^1\text{H}$  NMR spectra of the product **2t** (400 MHz,  $\text{CDCl}_3$ )

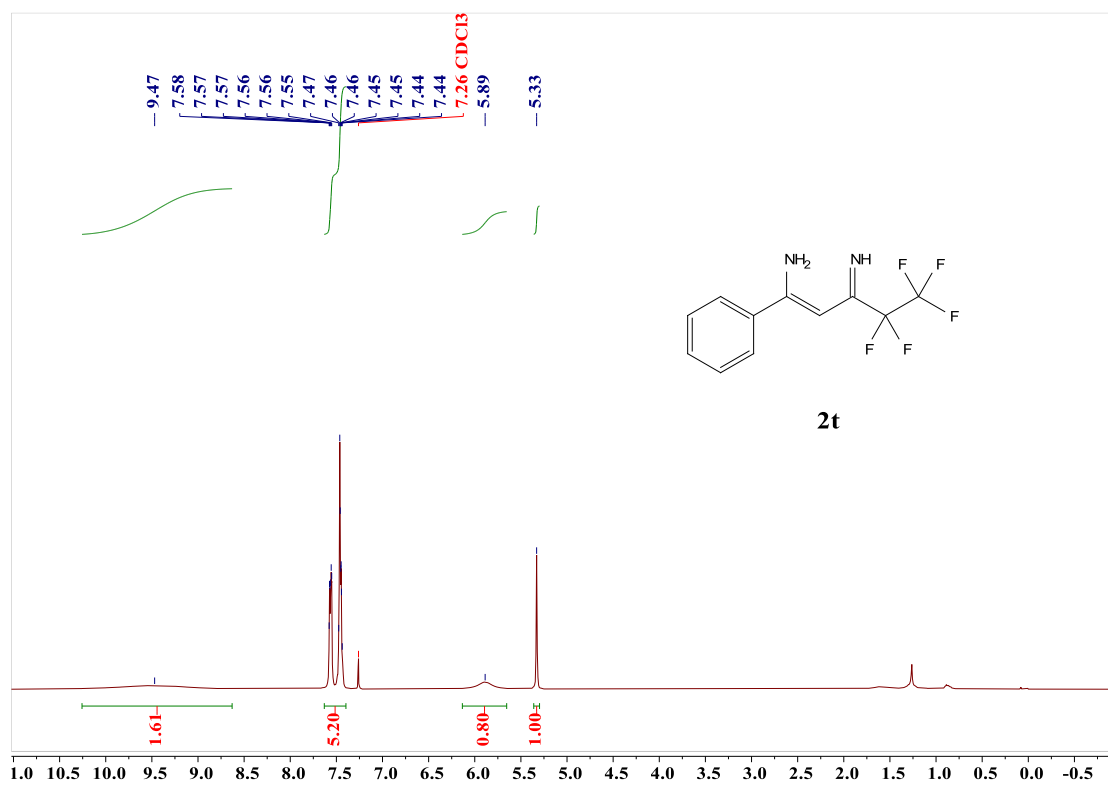

$^{19}\text{F}$  NMR spectra of the product **2t** (376 MHz,  $\text{CDCl}_3$ )

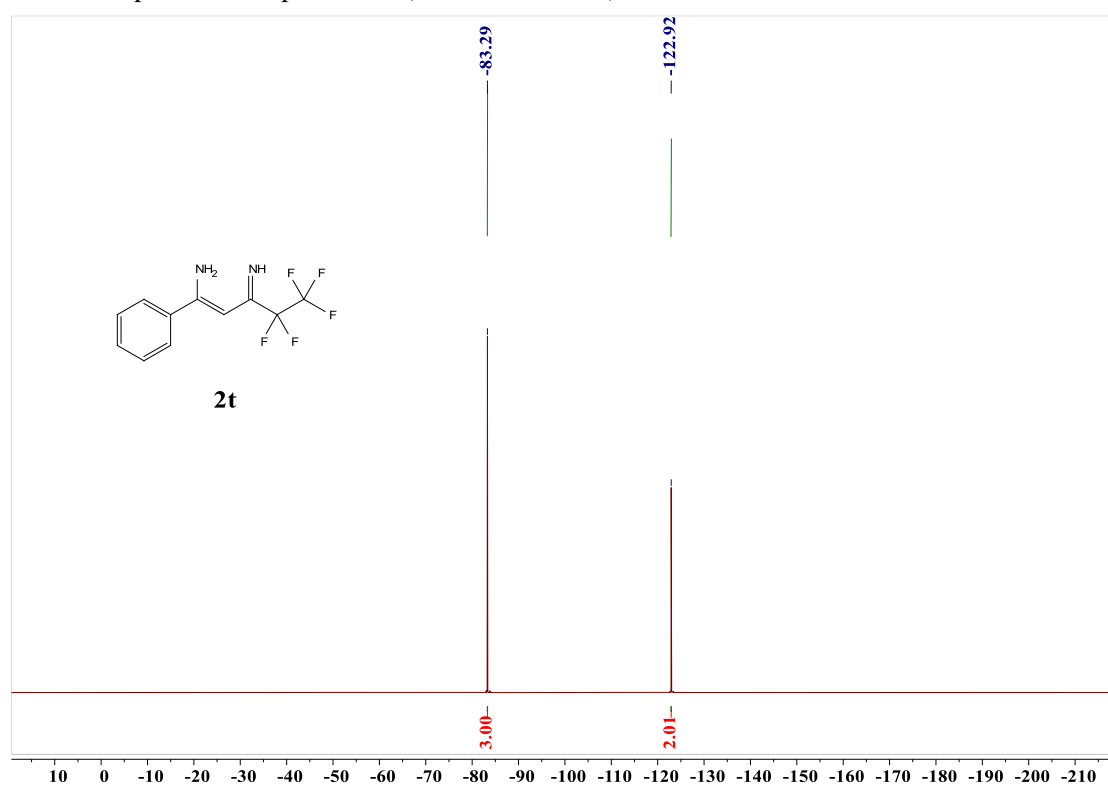

$^{13}\text{C}$  NMR spectra of the product **2t** (100 MHz,  $\text{CDCl}_3$ )

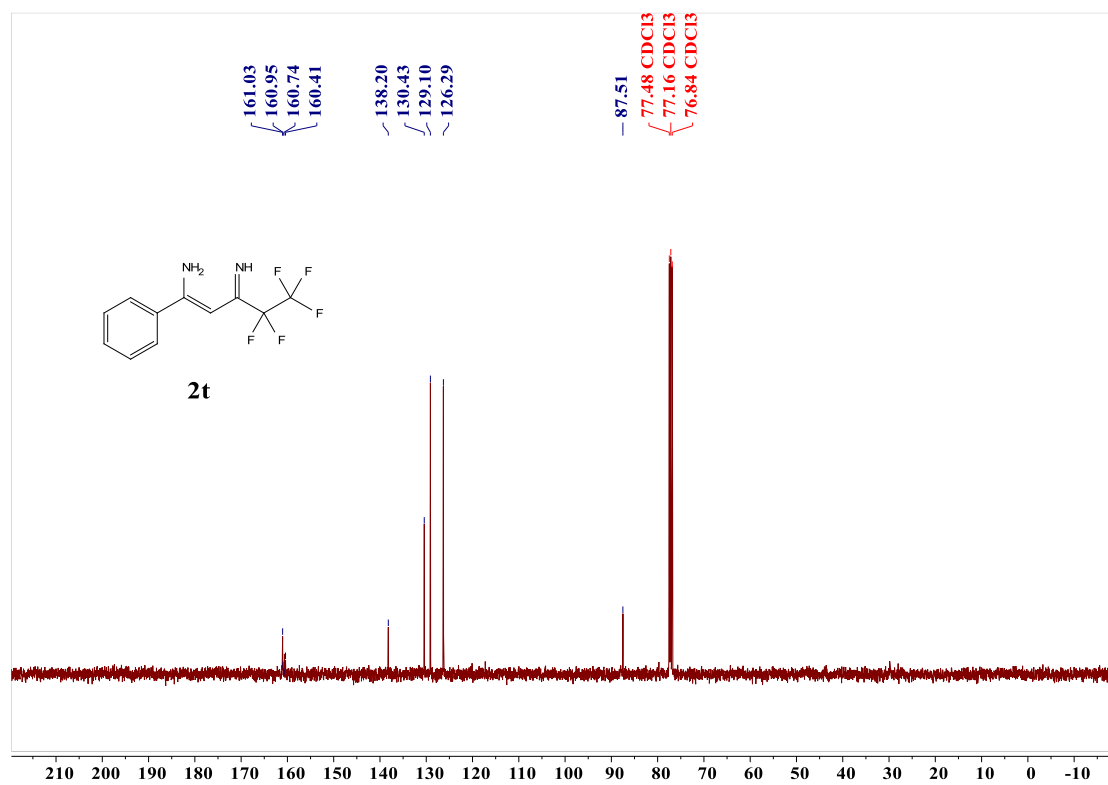

$^1\text{H}$  NMR spectra of the product **2u** (400 MHz,  $\text{CDCl}_3$ )

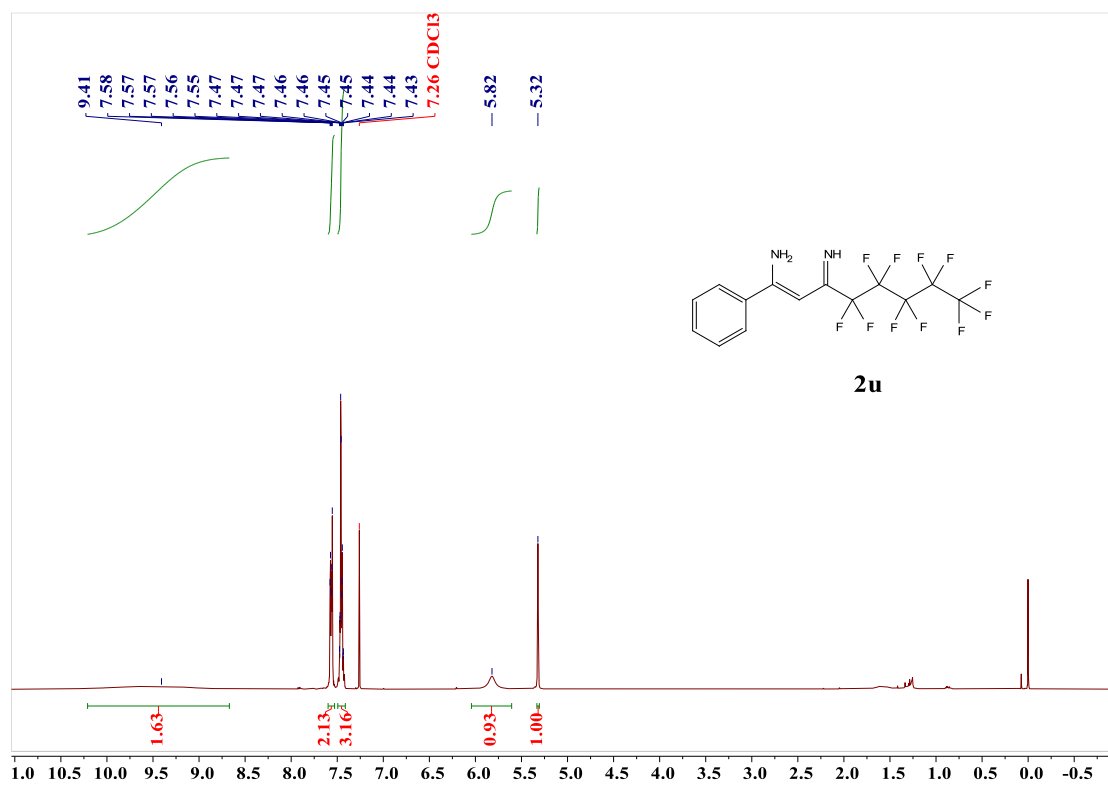

$^{19}\text{F}$  NMR spectra of the product **2u** (376 MHz,  $\text{CDCl}_3$ )

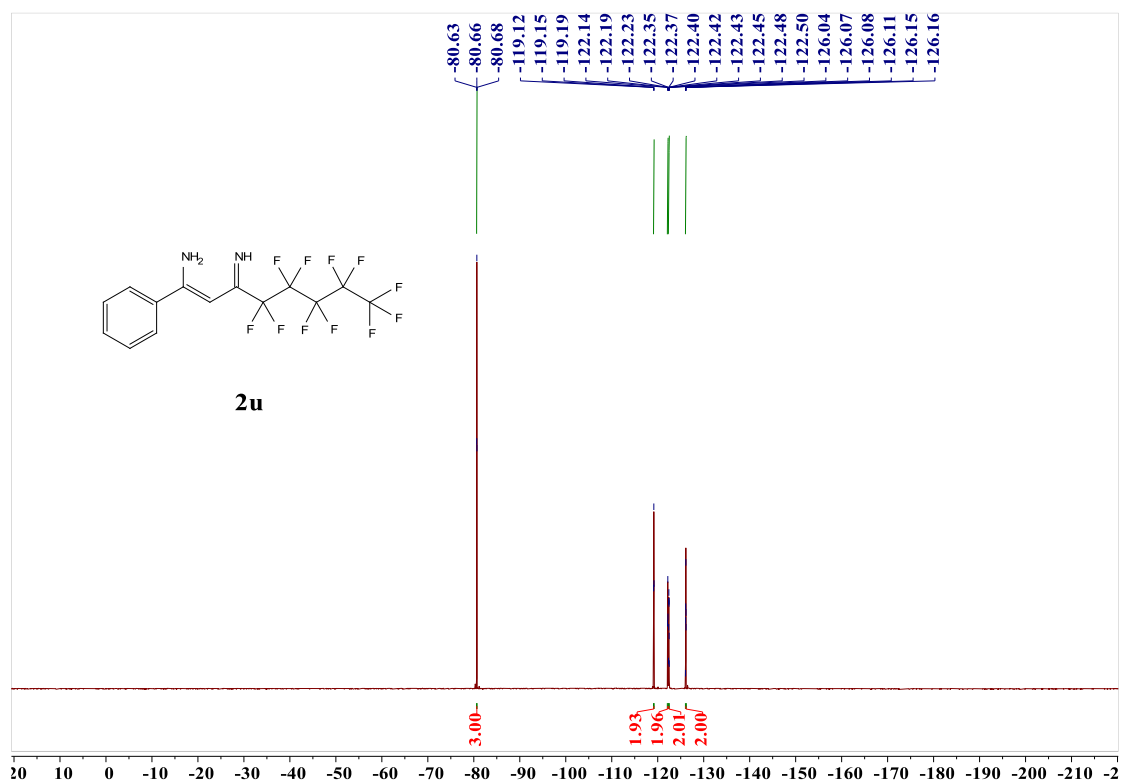

$^{13}\text{C}$  NMR spectra of the product **2u** (100 MHz,  $\text{CDCl}_3$ )

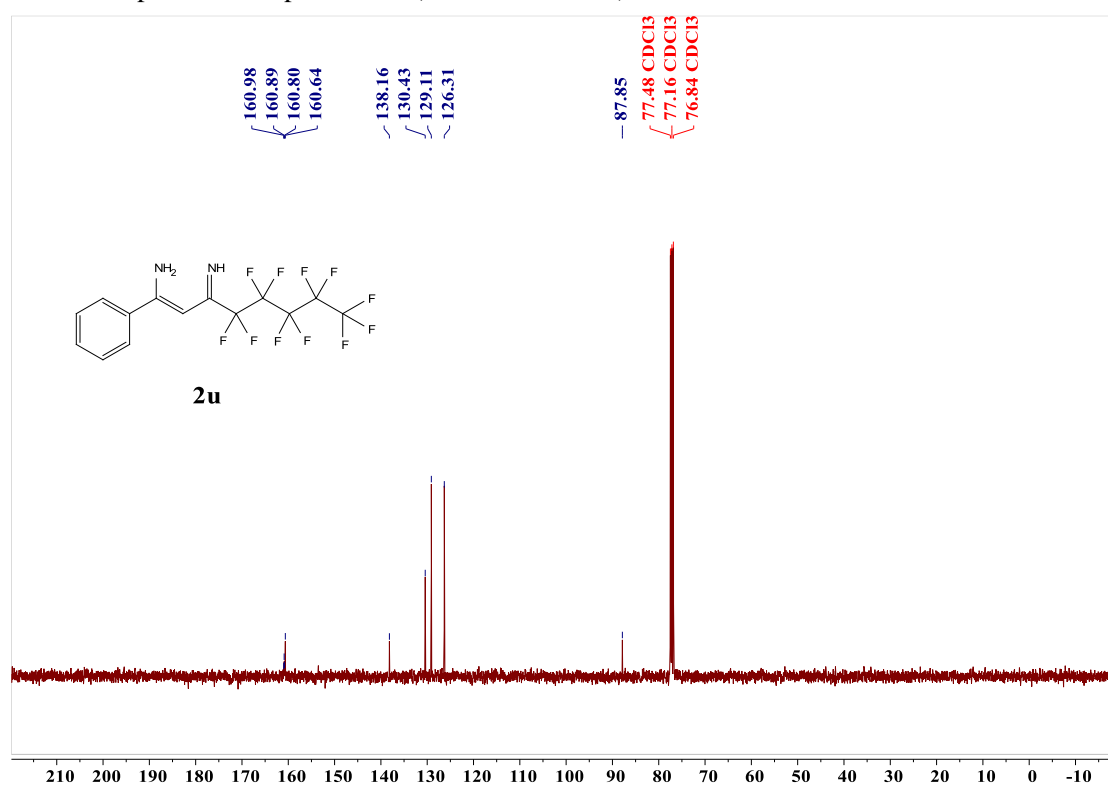

$^1\text{H}$  NMR spectra of the product **2v** (400 MHz,  $\text{CDCl}_3$ )

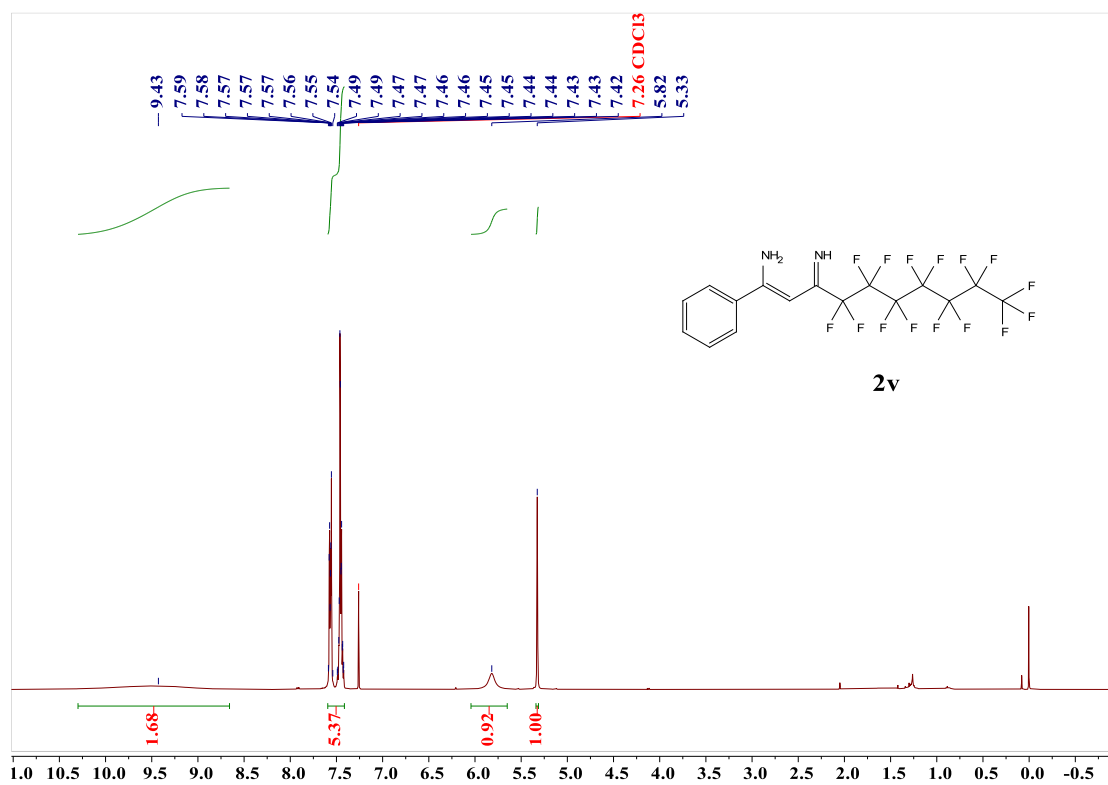

$^{19}\text{F}$  NMR spectra of the product **2v** (376 MHz,  $\text{CDCl}_3$ )

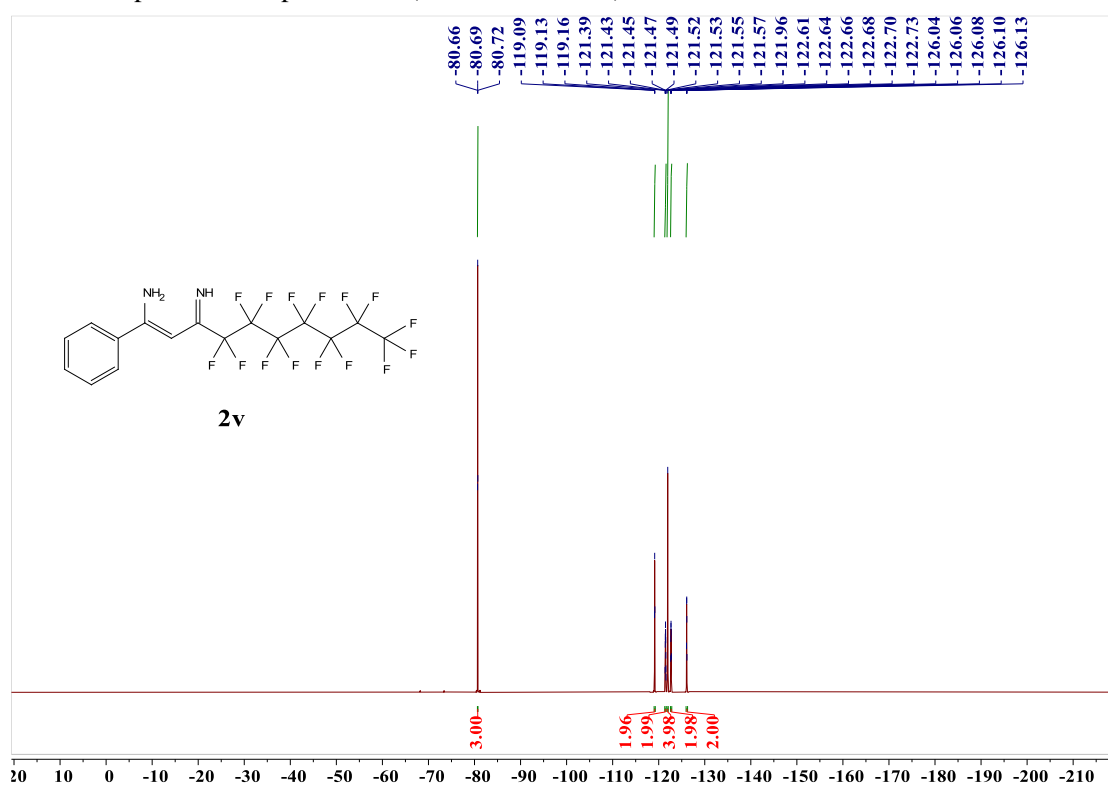







$^1\text{H}$  NMR spectra of the product **2x** (400 MHz,  $\text{CDCl}_3$ )

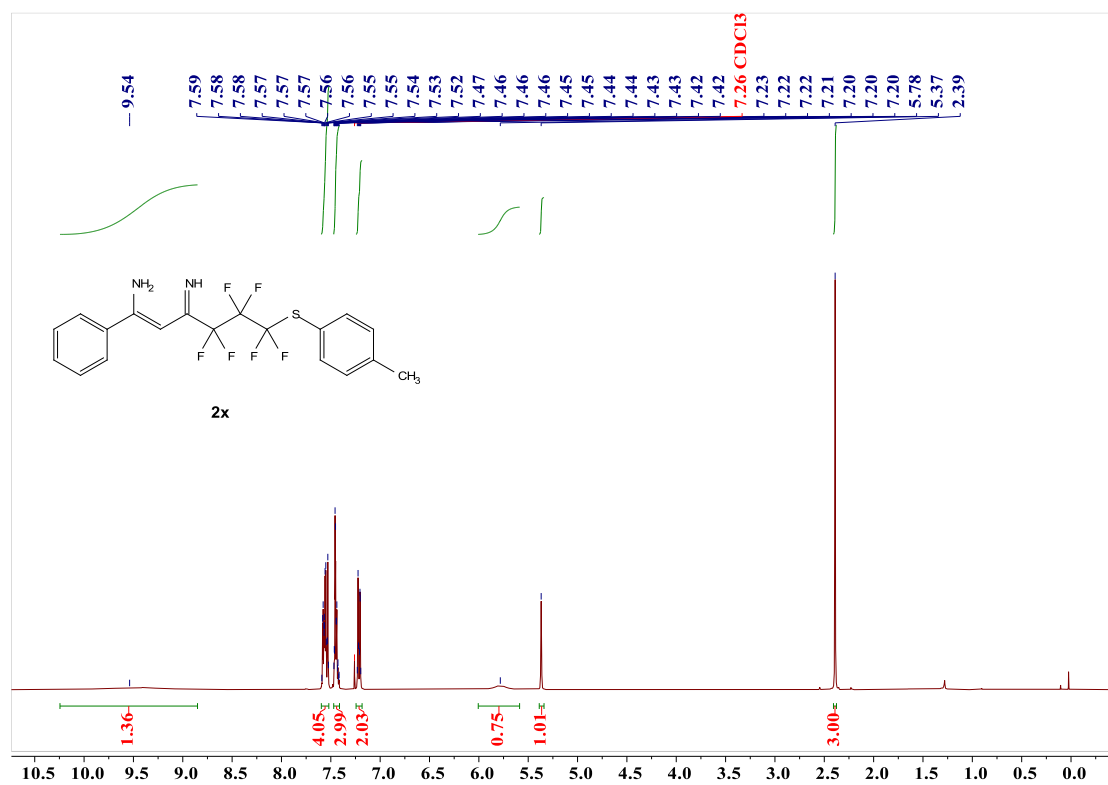

$^{19}\text{F}$  NMR spectra of the product **2x** (376 MHz,  $\text{CDCl}_3$ )

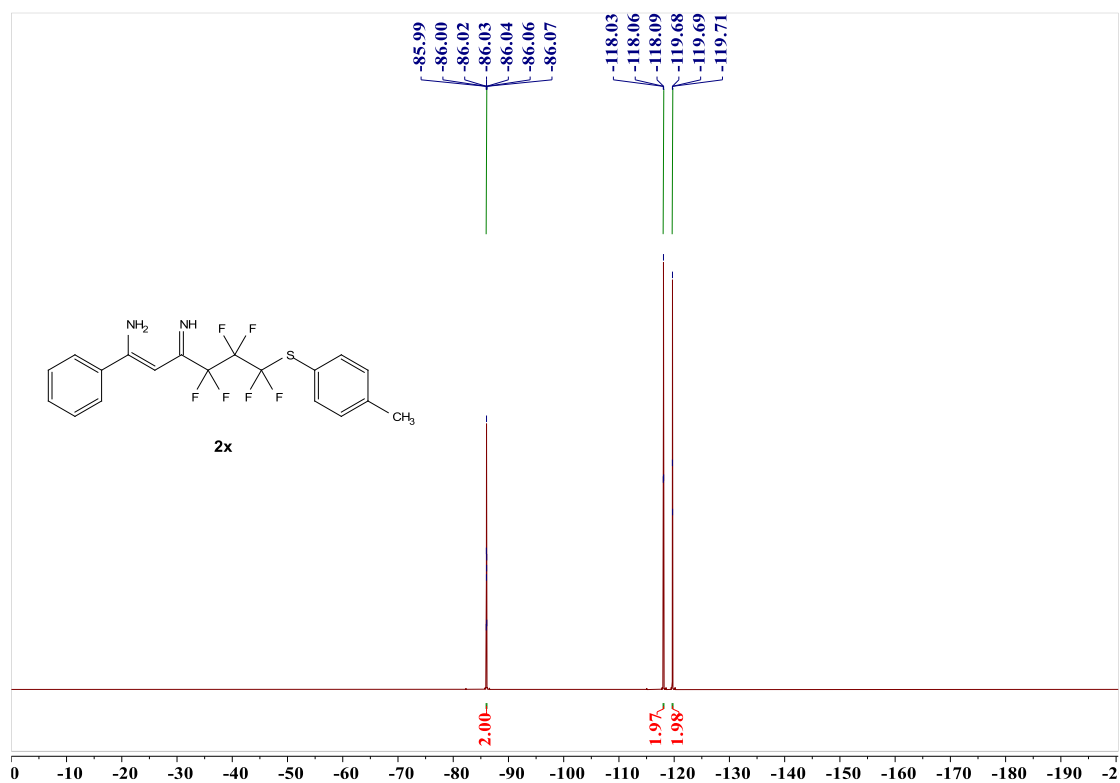



$^{19}\text{F}$  NMR spectra of the product **3a** (376 MHz,  $\text{CDCl}_3$ )

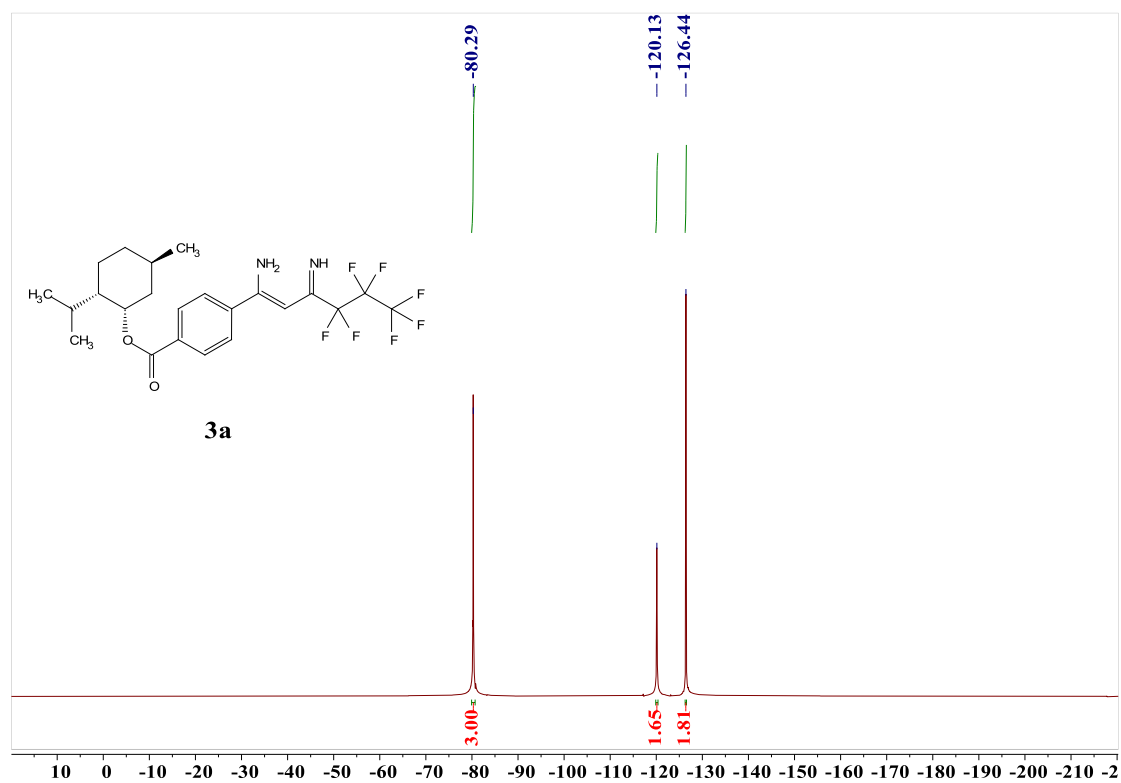

$^{13}\text{C}$  NMR spectra of the product **3a** (100 MHz,  $\text{CDCl}_3$ )

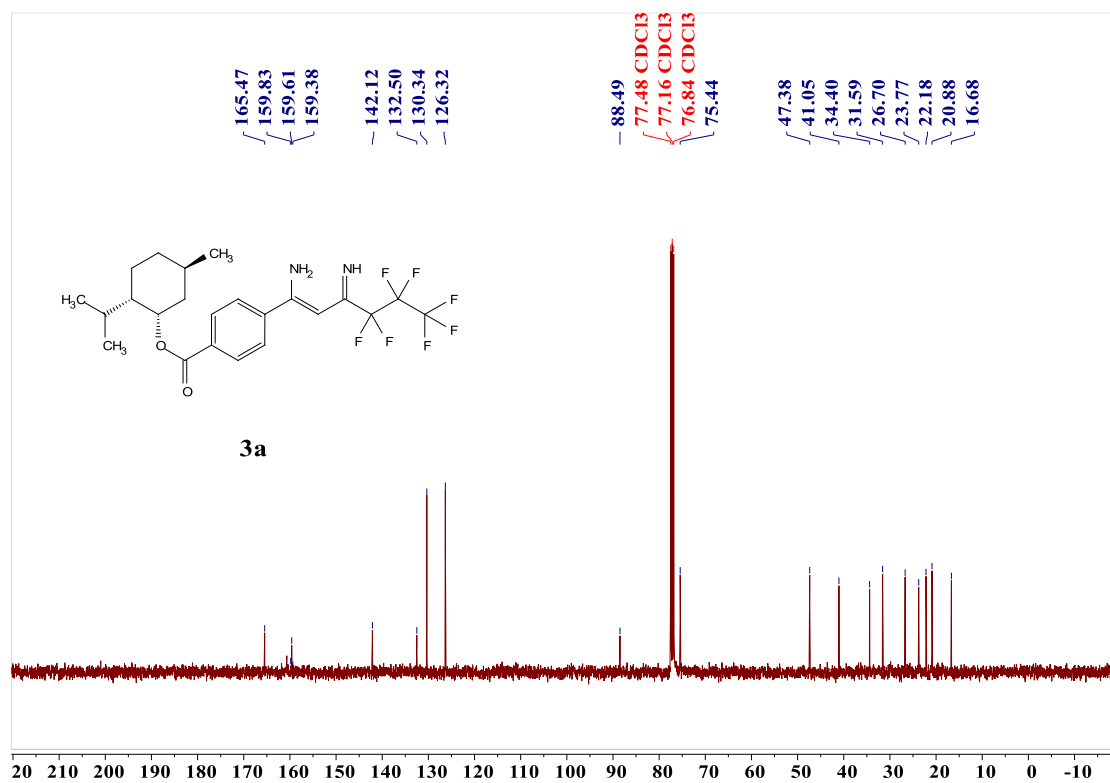

$^1\text{H}$  NMR spectra of the product **3b** (400 MHz,  $\text{CDCl}_3$ )

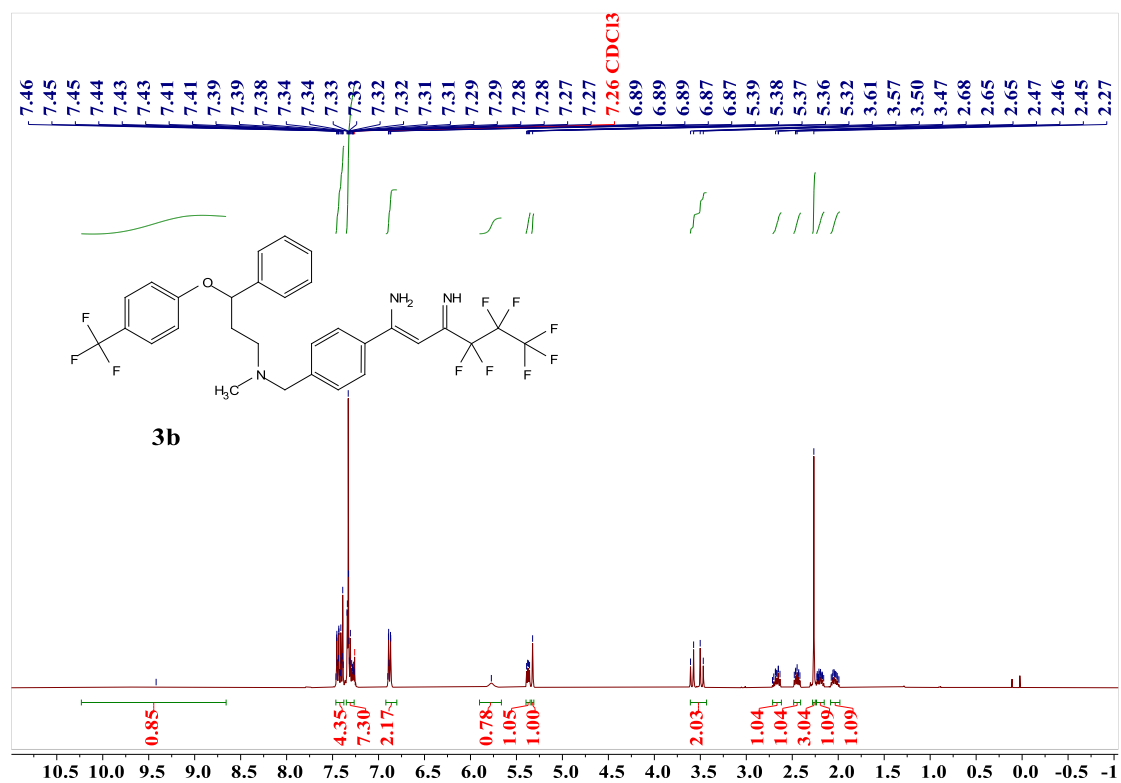

$^{19}\text{F}$  NMR spectra of the product **3b** (376 MHz,  $\text{CDCl}_3$ )

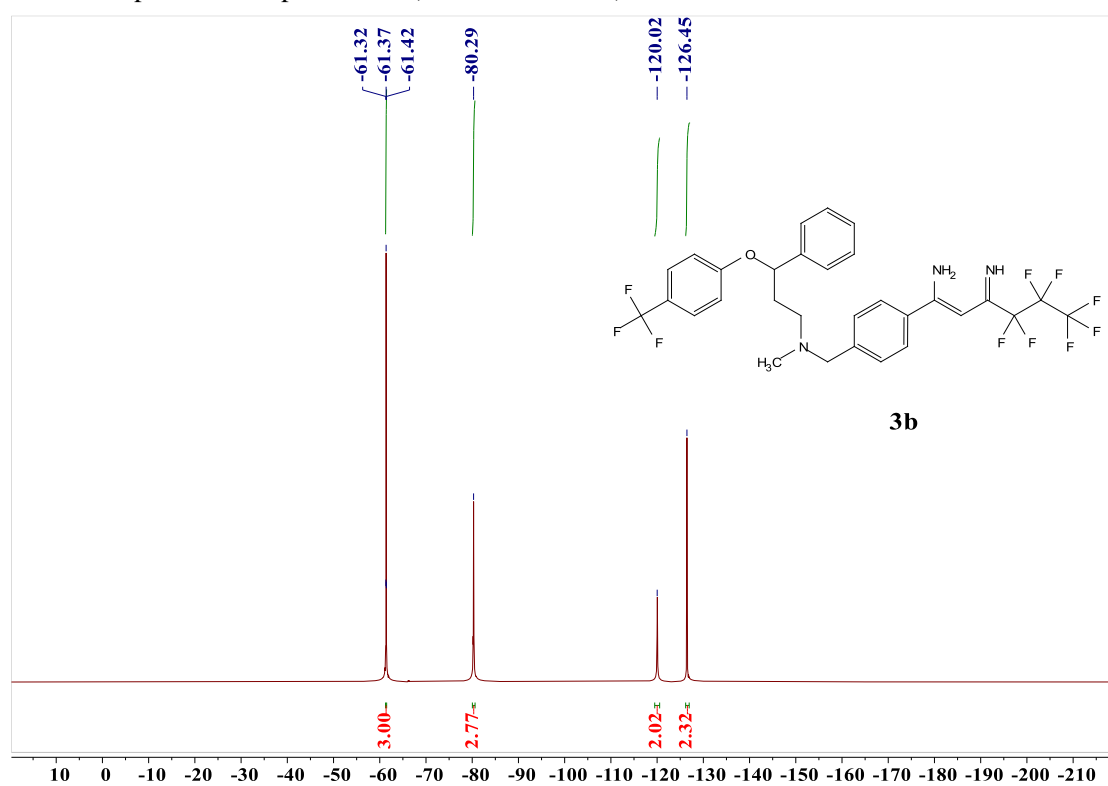

$^{13}\text{C}$  NMR spectra of the product **3b** (100 MHz,  $\text{CDCl}_3$ )

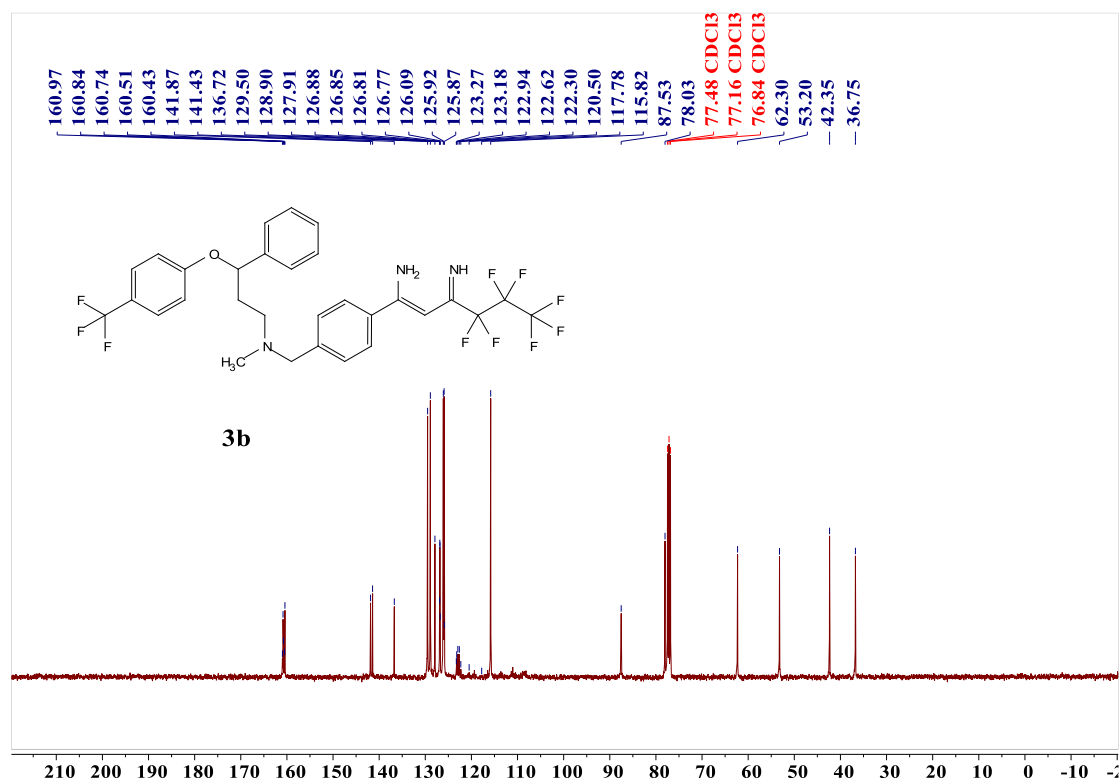

$^1\text{H}$  NMR spectra of the product **3c** (400 MHz,  $\text{CDCl}_3$ )

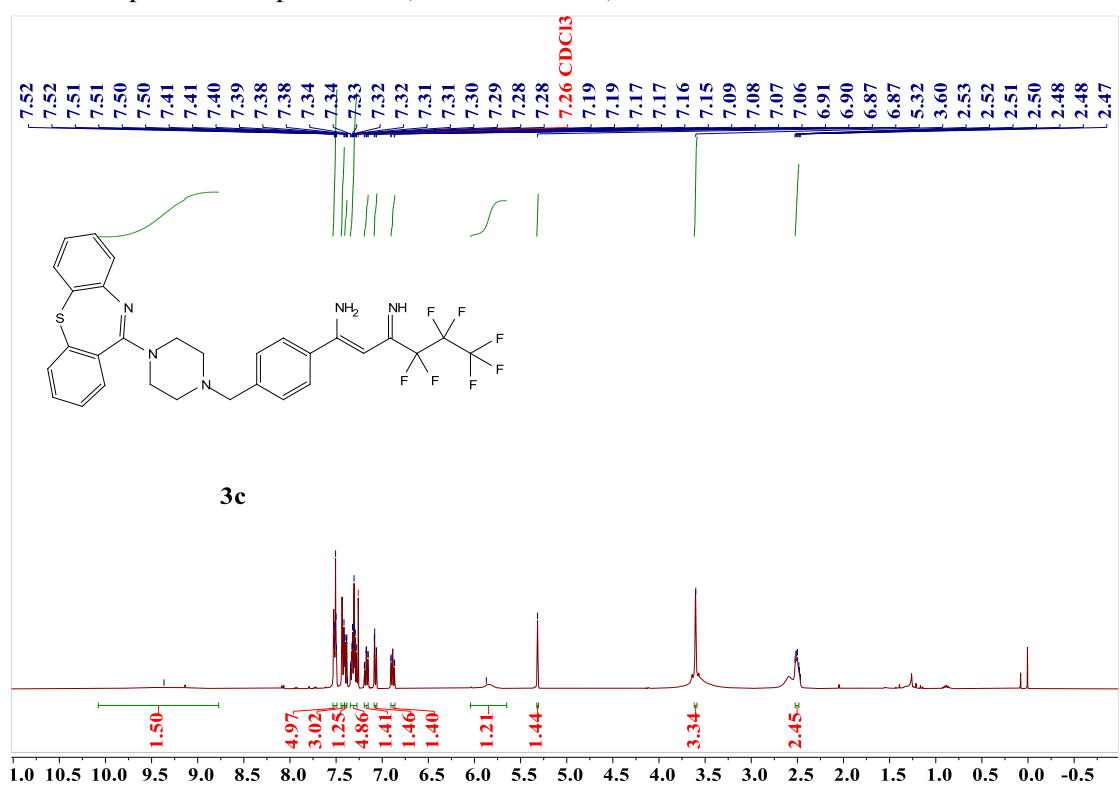

$^{19}\text{F}$  NMR spectra of the product **3c** (376 MHz,  $\text{CDCl}_3$ )

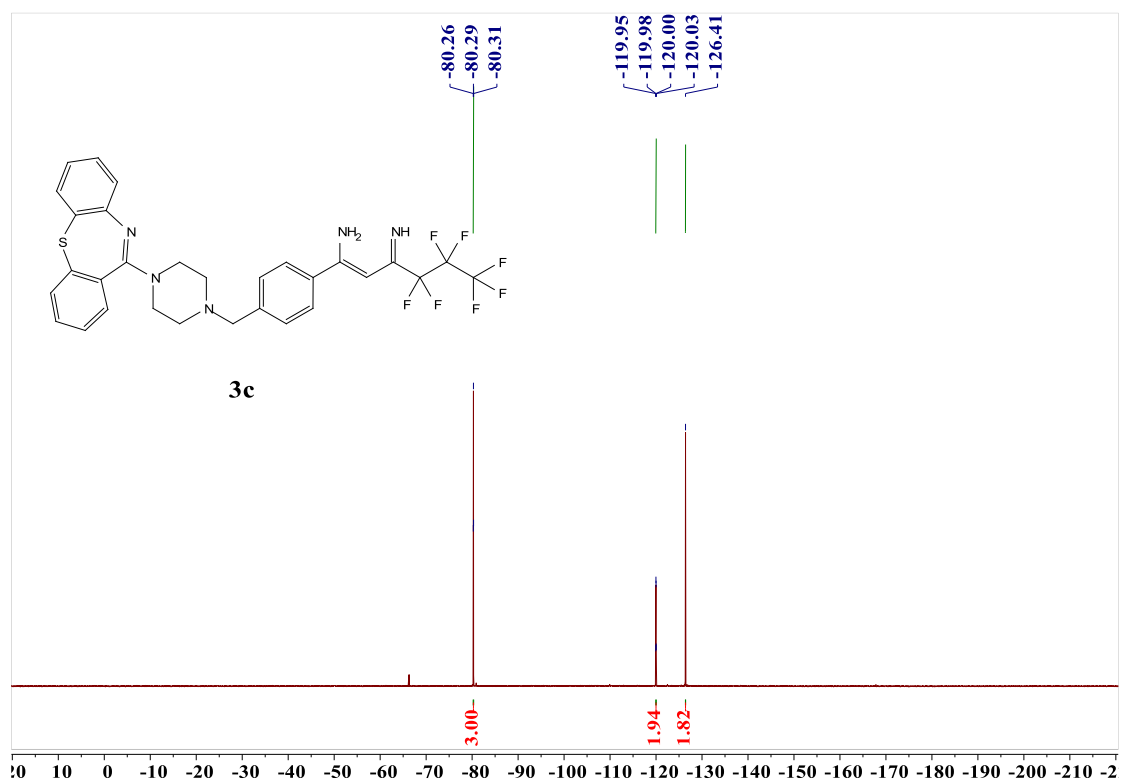

$^{13}\text{C}$  NMR spectra of the product **3c** (100 MHz,  $\text{CDCl}_3$ )

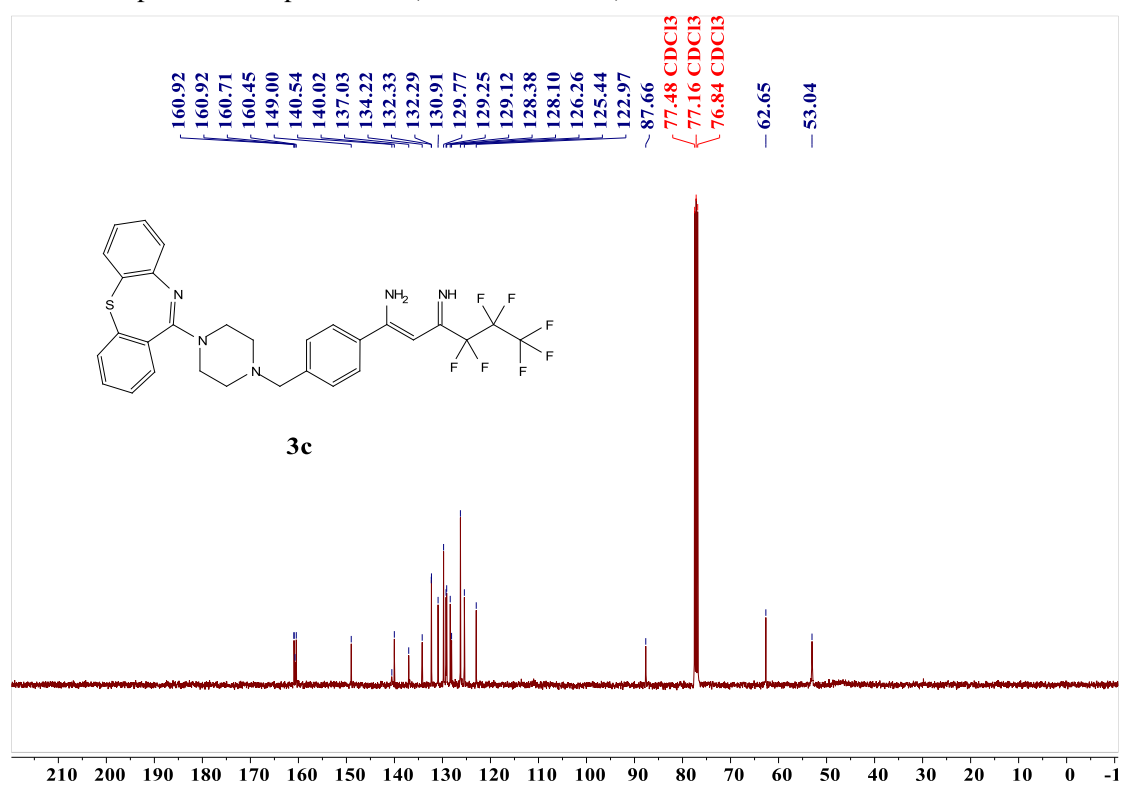

$^1\text{H}$  NMR spectra of the product **4** (400 MHz,  $\text{CDCl}_3$ )

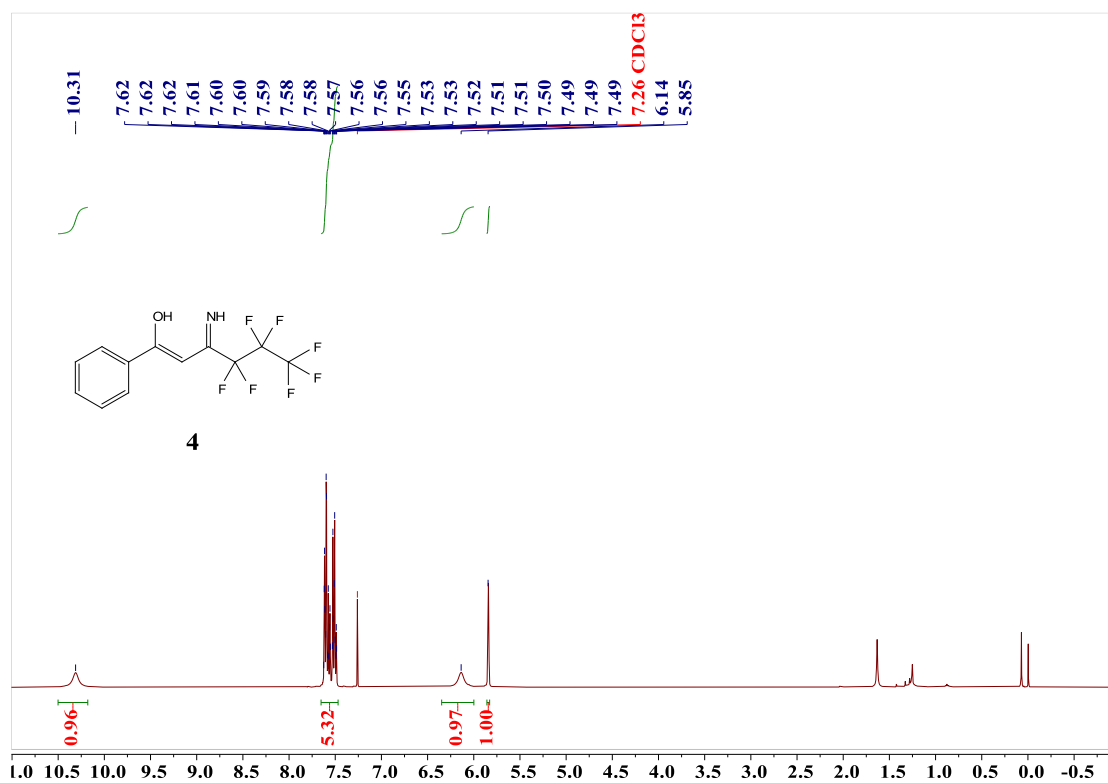

$^{19}\text{F}$  NMR spectra of the product **4** (376 MHz,  $\text{CDCl}_3$ )

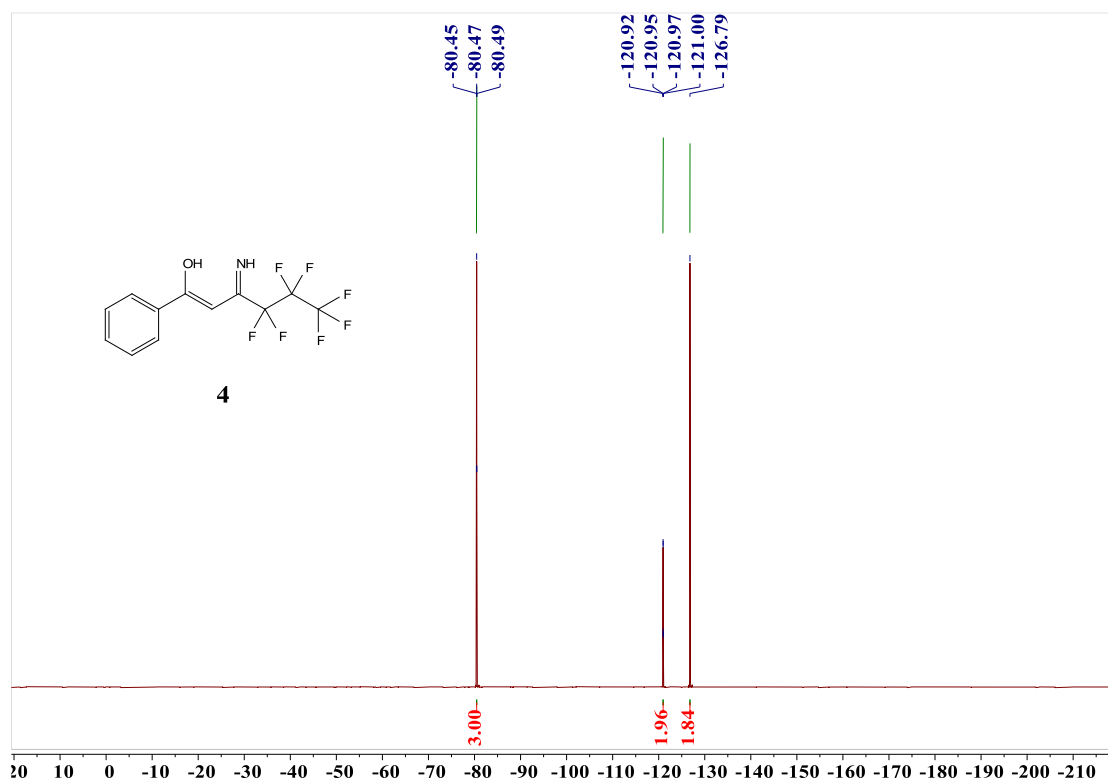



$^{13}\text{C}$  NMR spectra of the product **4** (100 MHz,  $\text{CDCl}_3$ )

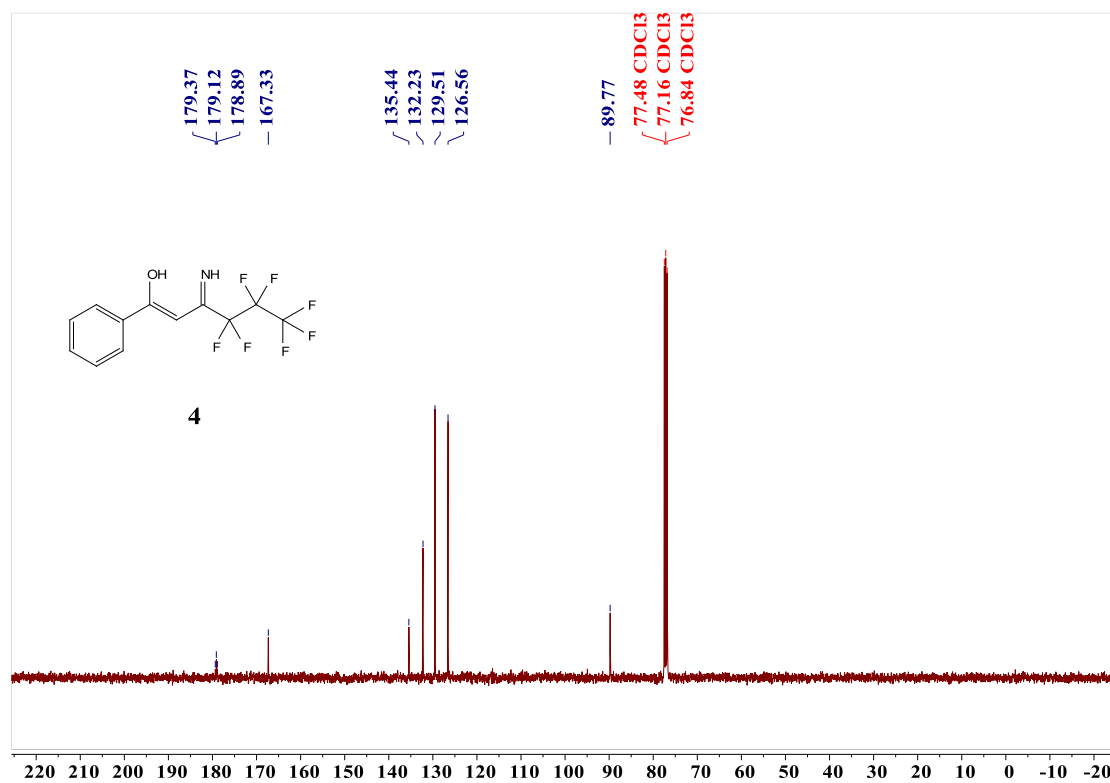

$^1\text{H}$  NMR spectra of the product **5** (400 MHz,  $\text{CDCl}_3$ )

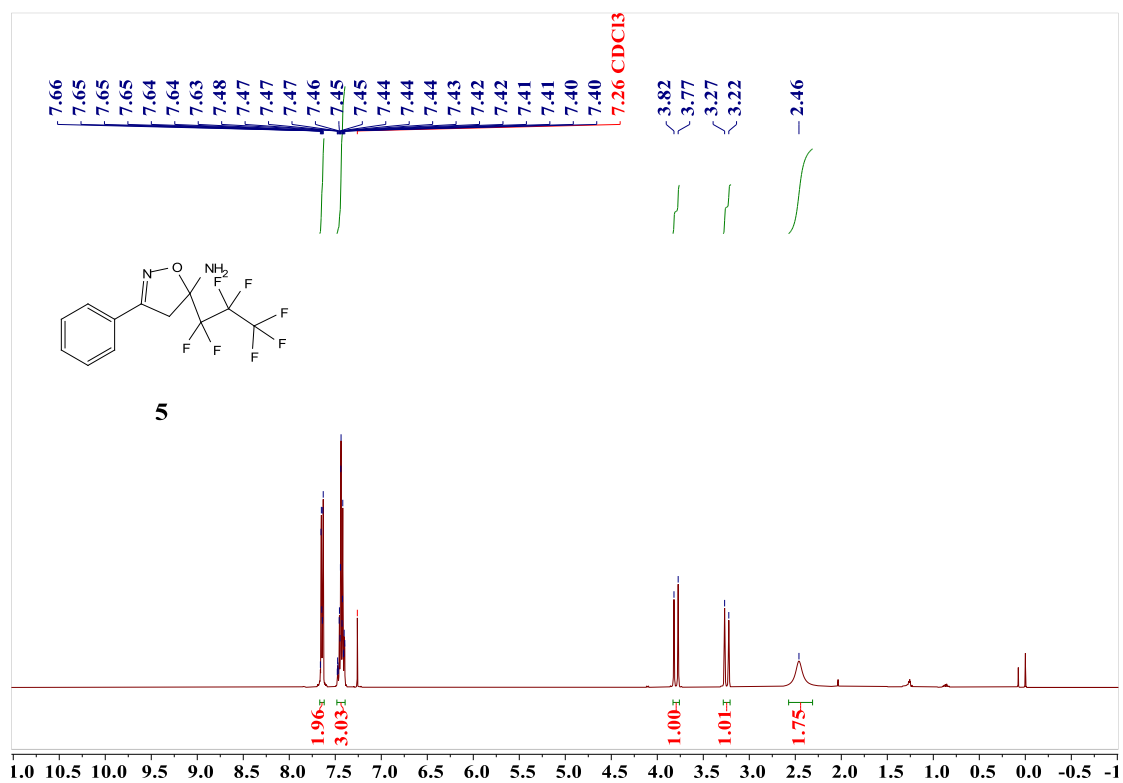

$^{19}\text{F}$  NMR spectra of the product **5** (376 MHz,  $\text{CDCl}_3$ )

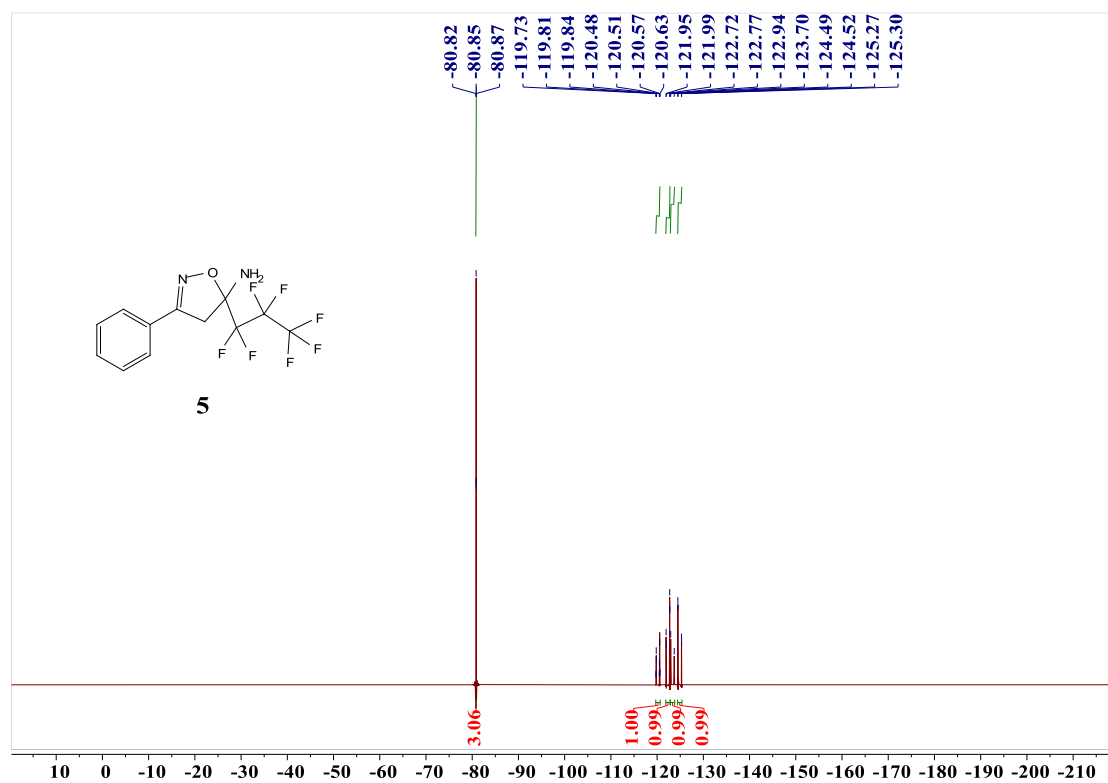

$^{13}\text{C}$  NMR spectra of the product **5** (100 MHz,  $\text{CDCl}_3$ )

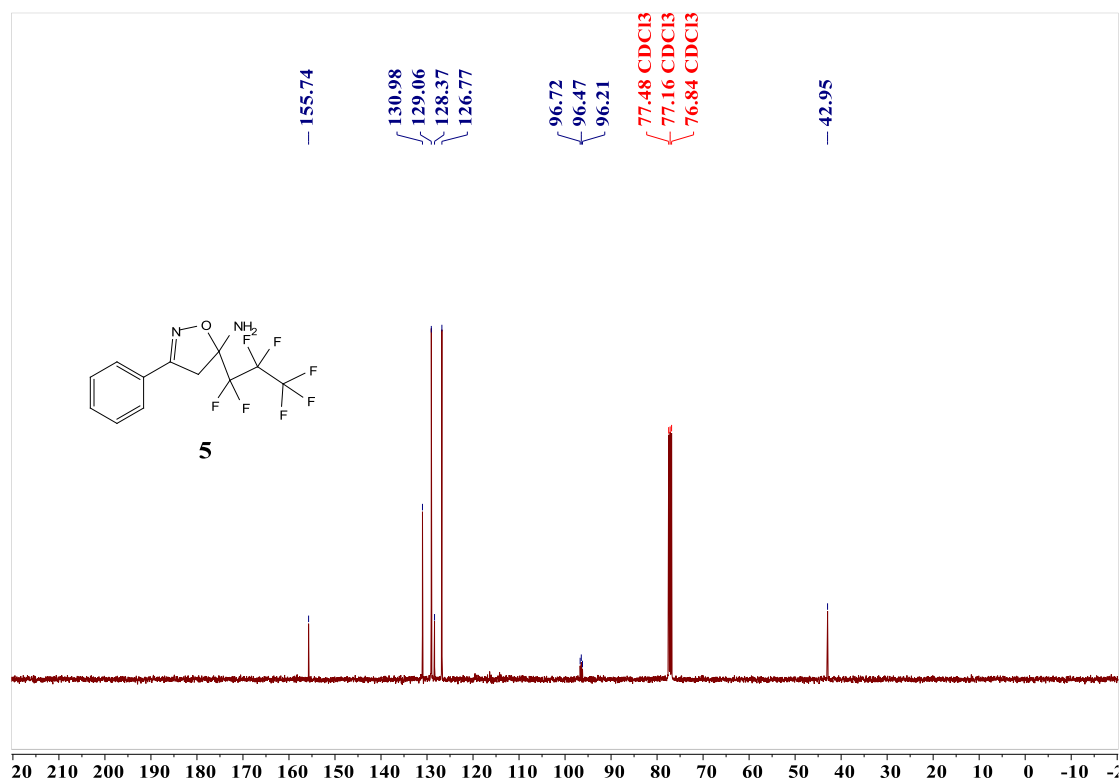

$^1\text{H}$  NMR spectra of the product **6** (400 MHz,  $\text{CDCl}_3$ )

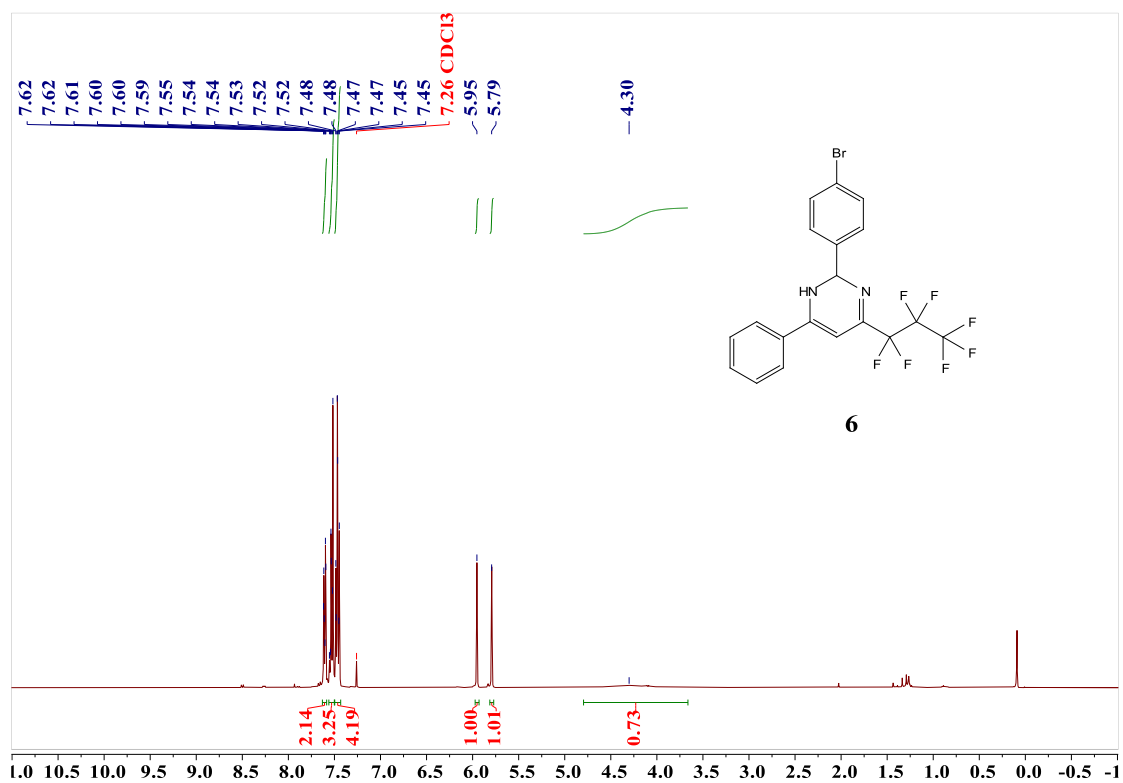

$^{19}\text{F}$  NMR spectra of the product **6** (376 MHz,  $\text{CDCl}_3$ )

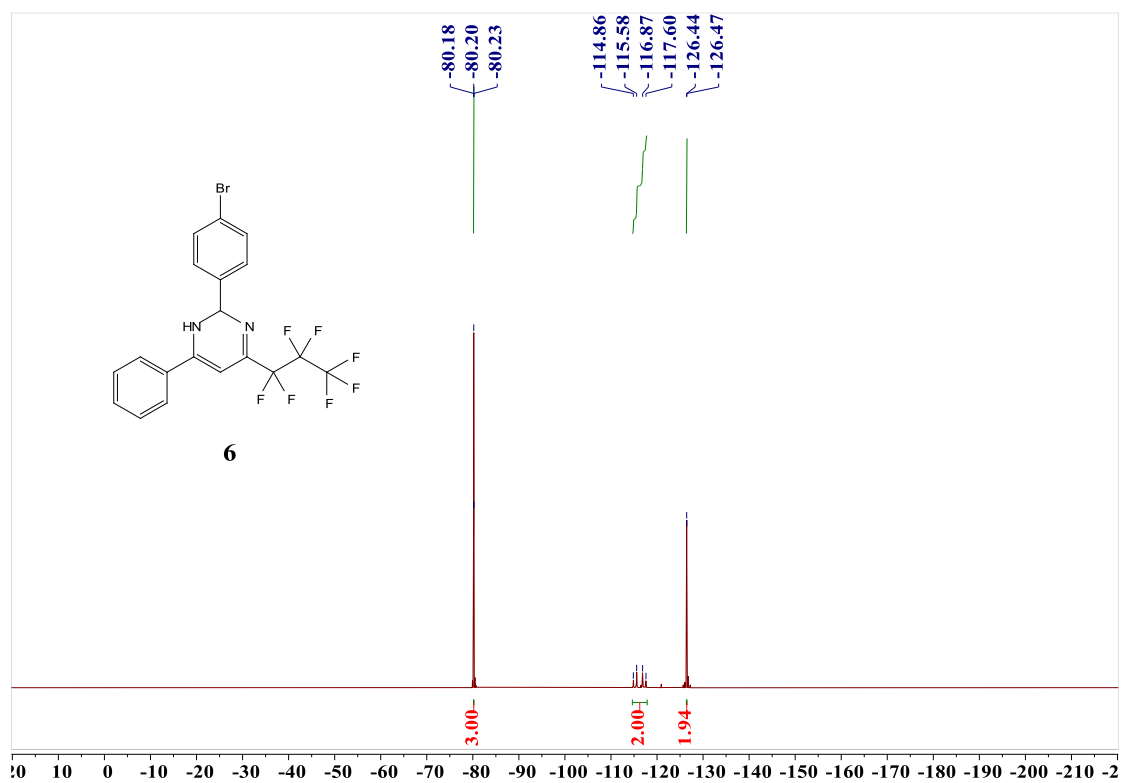

$^{13}\text{C}$  NMR spectra of the product **6** (100 MHz,  $\text{CDCl}_3$ )

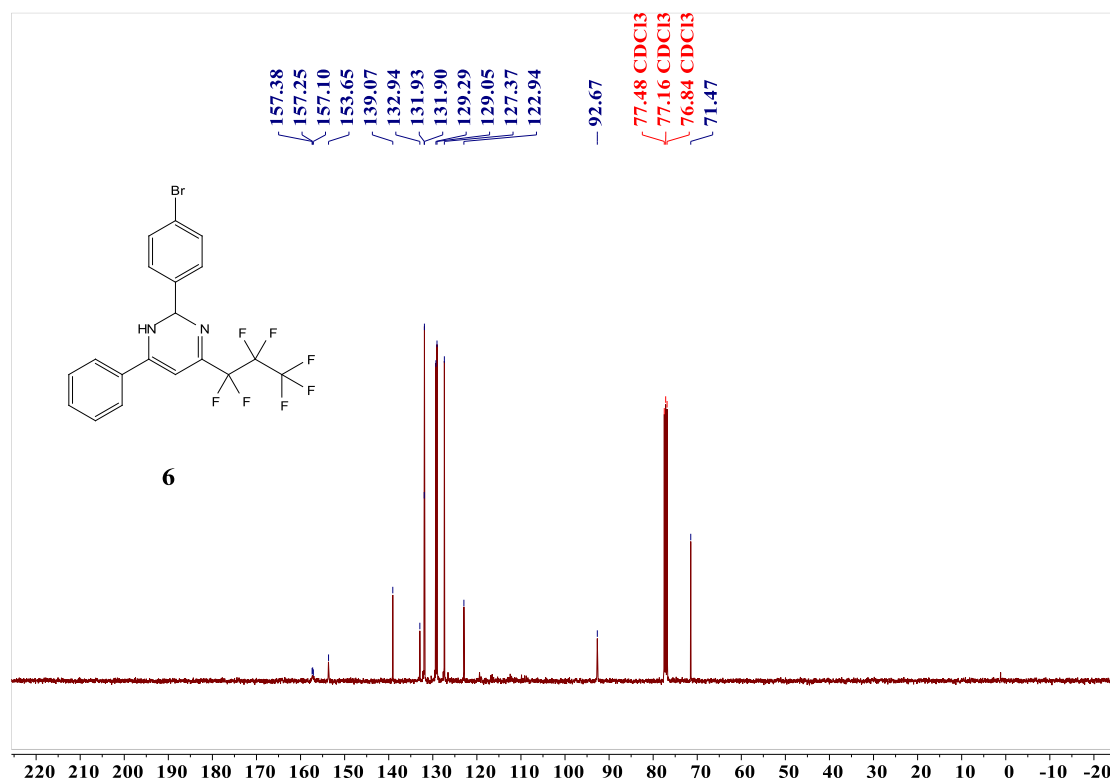

$^1\text{H}$  NMR spectra of the product **7** (400 MHz,  $\text{CDCl}_3$ )

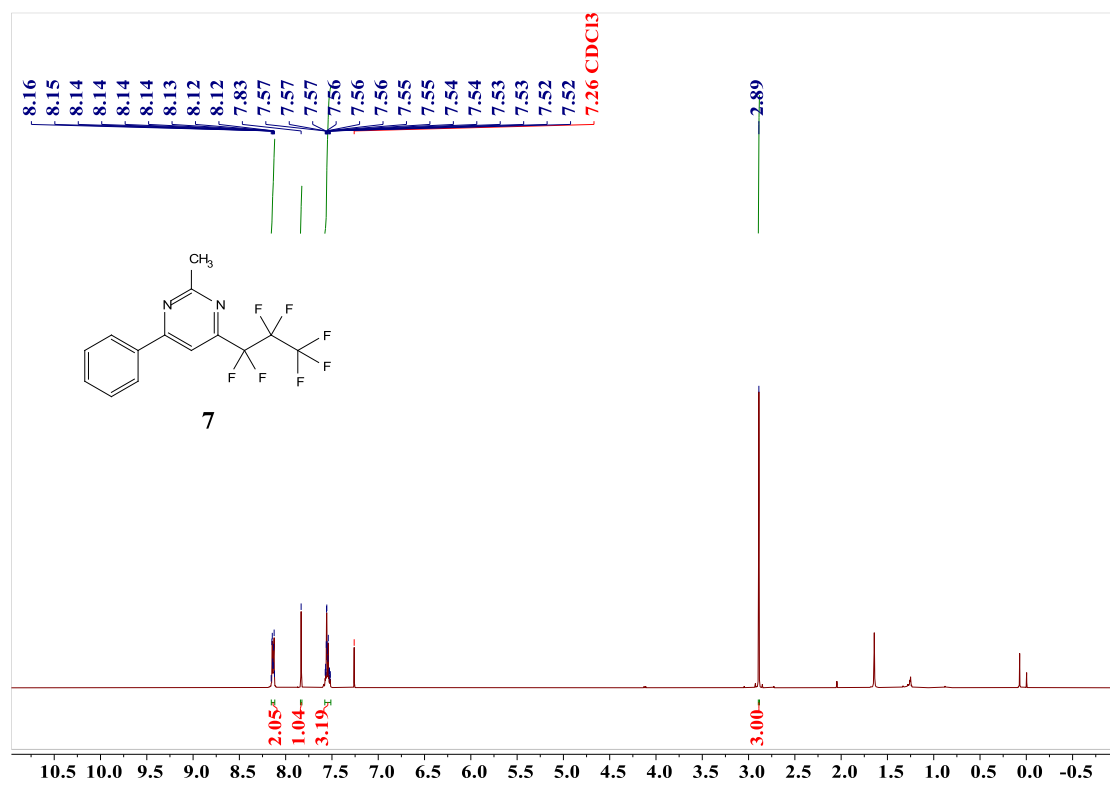

$^{19}\text{F}$  NMR spectra of the product **7** (376 MHz,  $\text{CDCl}_3$ )

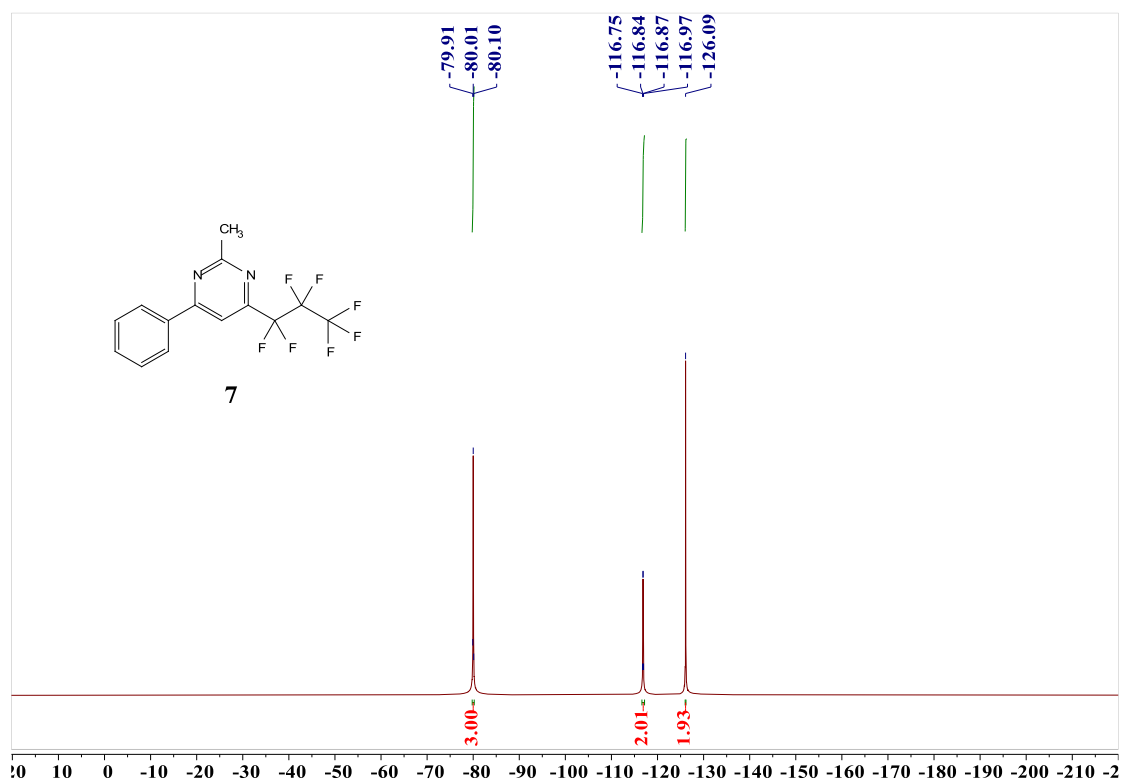

$^{13}\text{C}$  NMR spectra of the product **7** (100 MHz,  $\text{CDCl}_3$ )

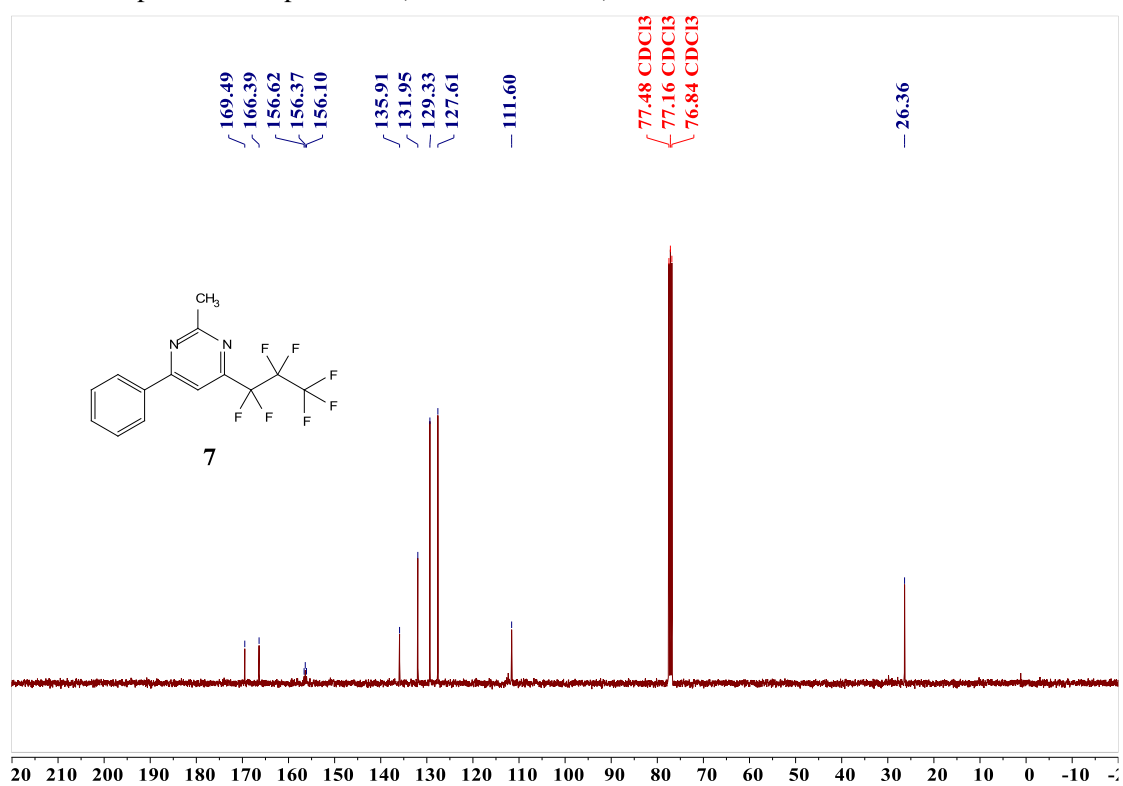

$^1\text{H}$  NMR spectra of the product **10a** (400 MHz,  $\text{CDCl}_3$ )

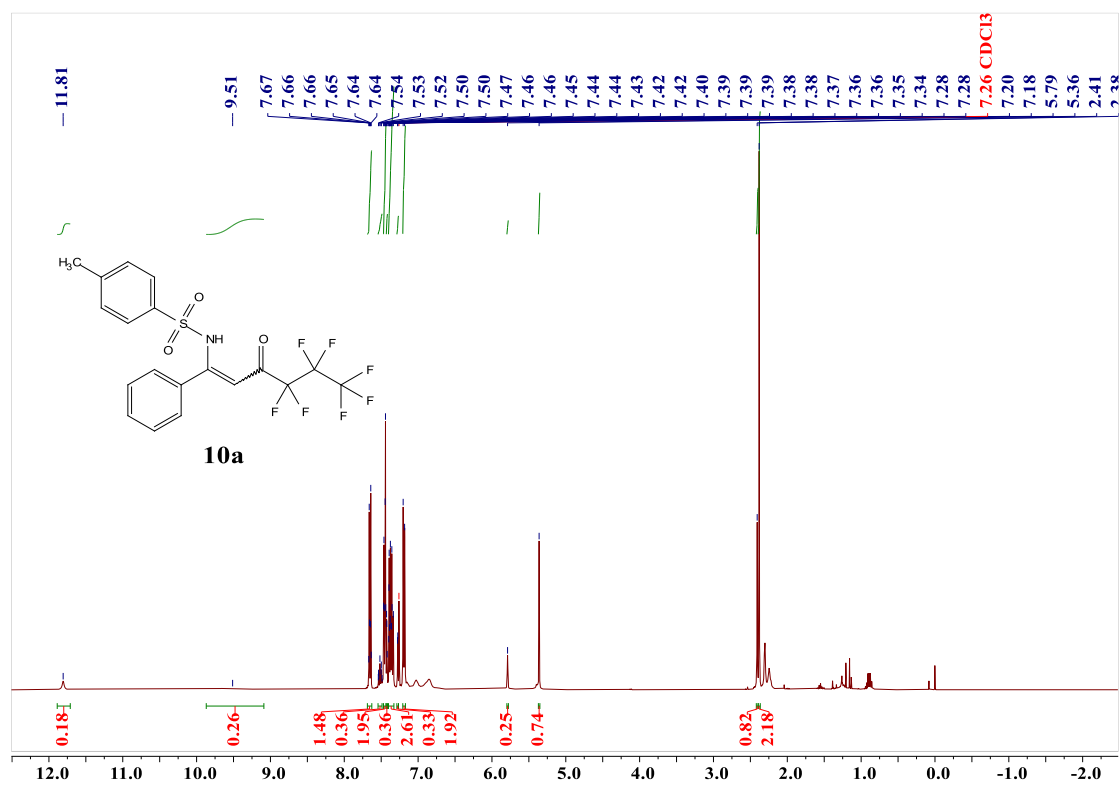

$^{19}\text{F}$  NMR spectra of the product **10a** (376 MHz,  $\text{CDCl}_3$ )

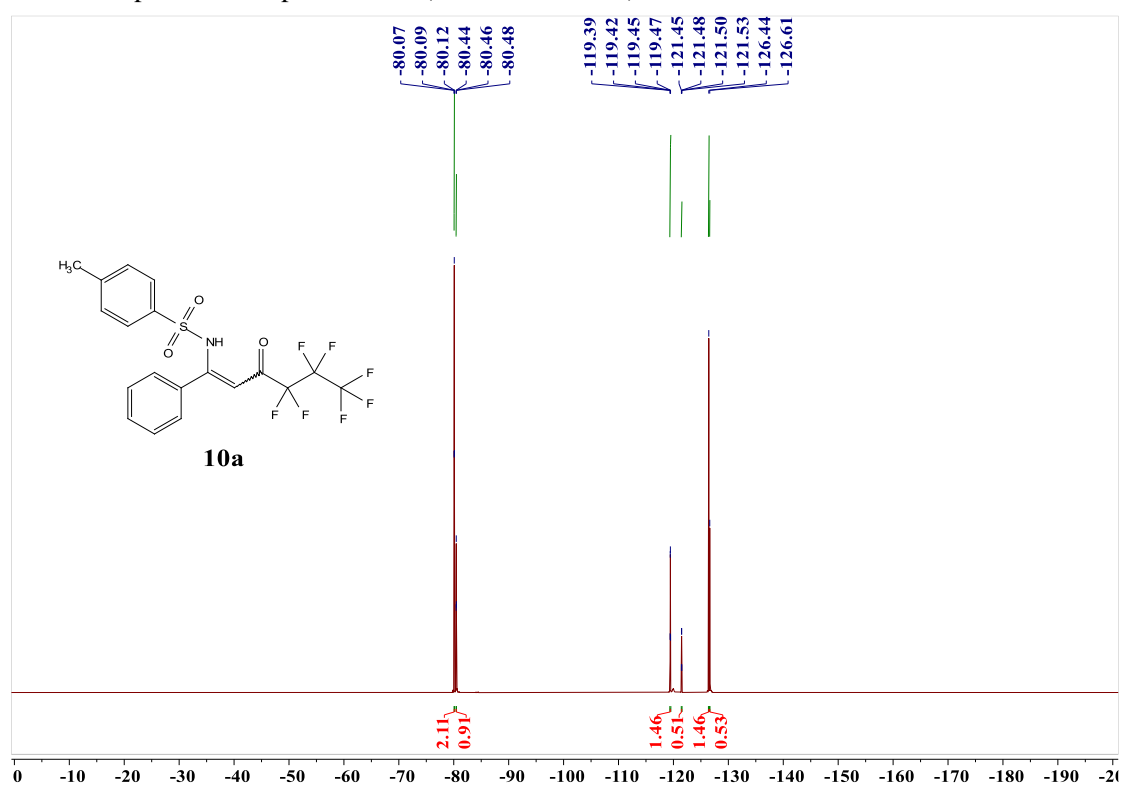

$^{13}\text{C}$  NMR spectra of the product **10a** (100 MHz,  $\text{CDCl}_3$ )

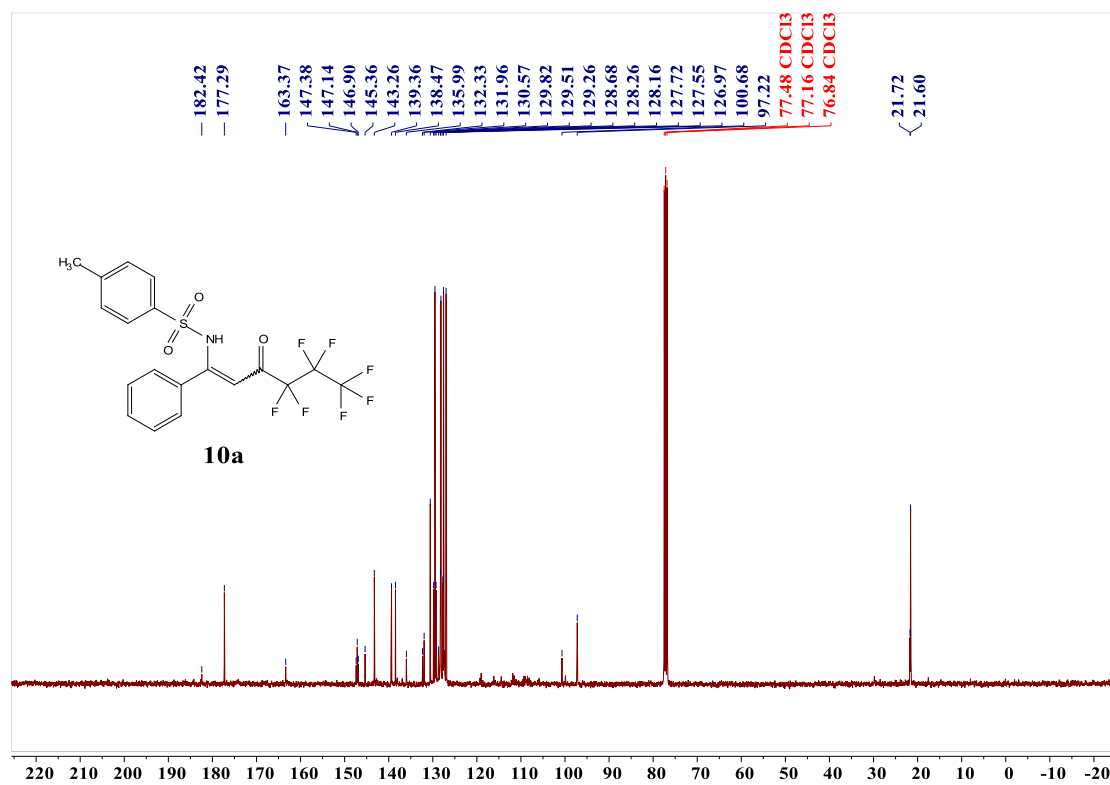

$^1\text{H}$  NMR spectra of the product **10b** (400 MHz,  $\text{CDCl}_3$ )

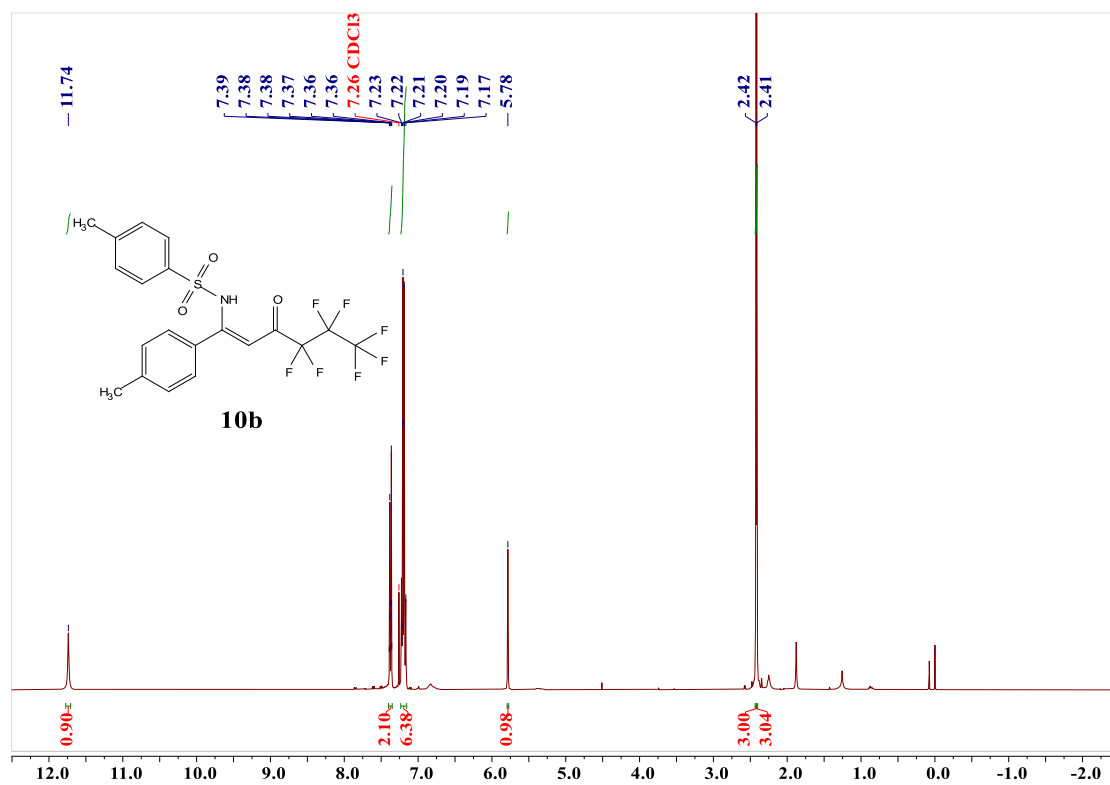

$^{19}\text{F}$  NMR spectra of the product **10b** (376 MHz,  $\text{CDCl}_3$ )

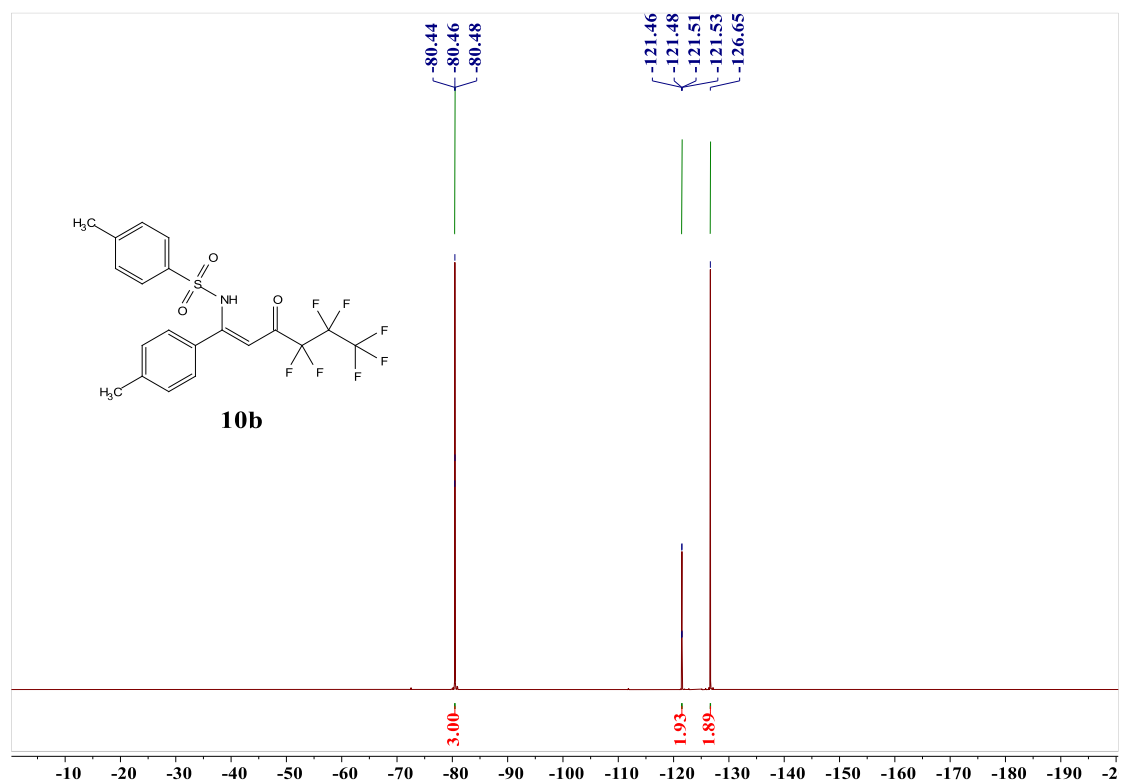

$^{13}\text{C}$  NMR spectra of the product **10b** (100 MHz,  $\text{CDCl}_3$ )

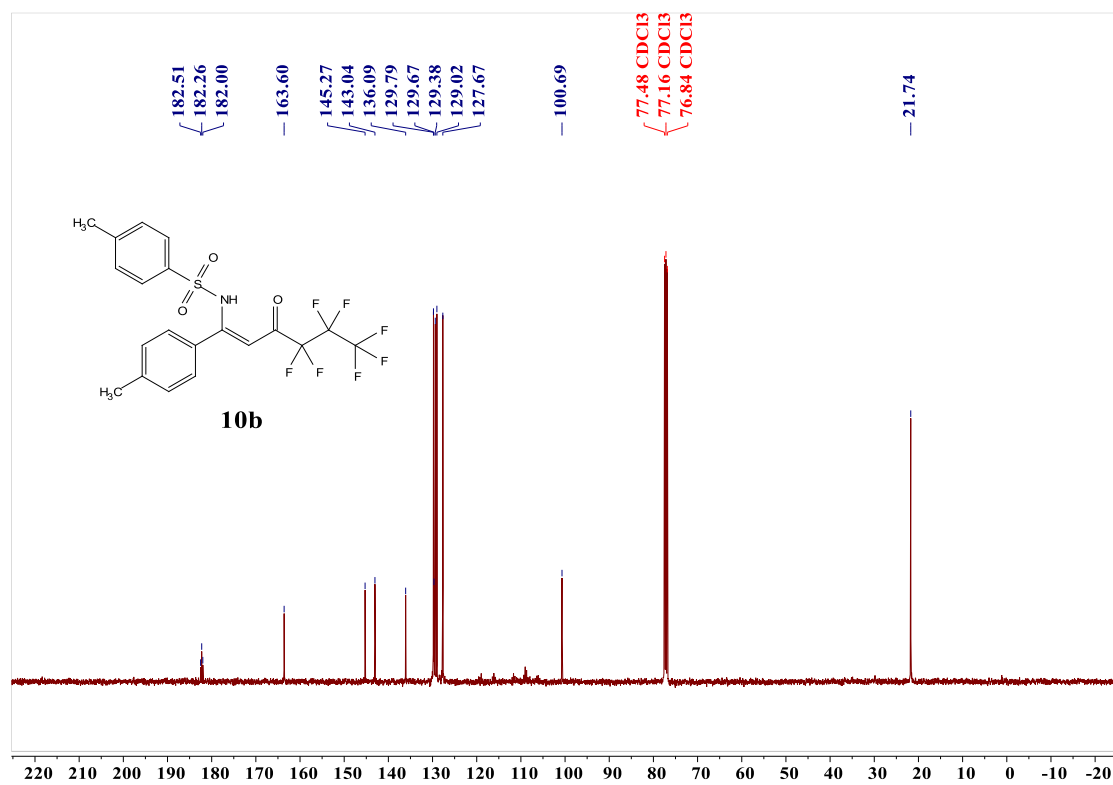



$^1\text{H}$  NMR spectra of the product **10c** (400 MHz,  $\text{CDCl}_3$ )

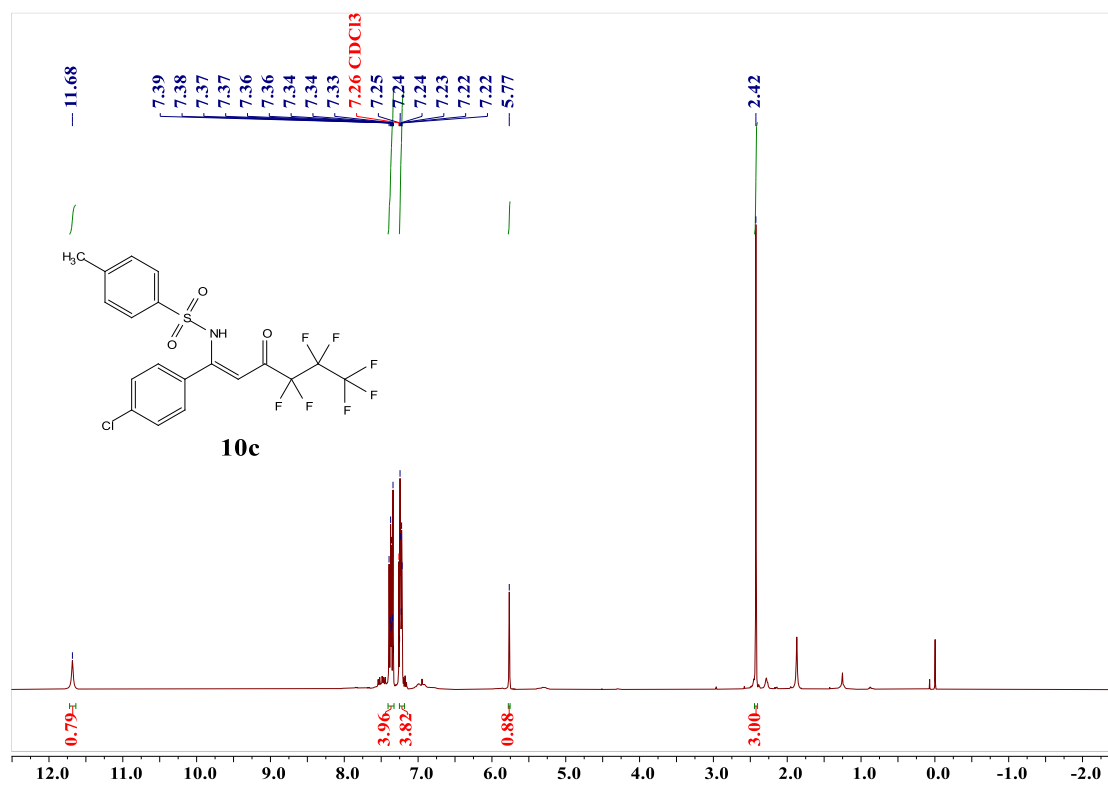

$^{19}\text{F}$  NMR spectra of the product **10c** (376 MHz,  $\text{CDCl}_3$ )

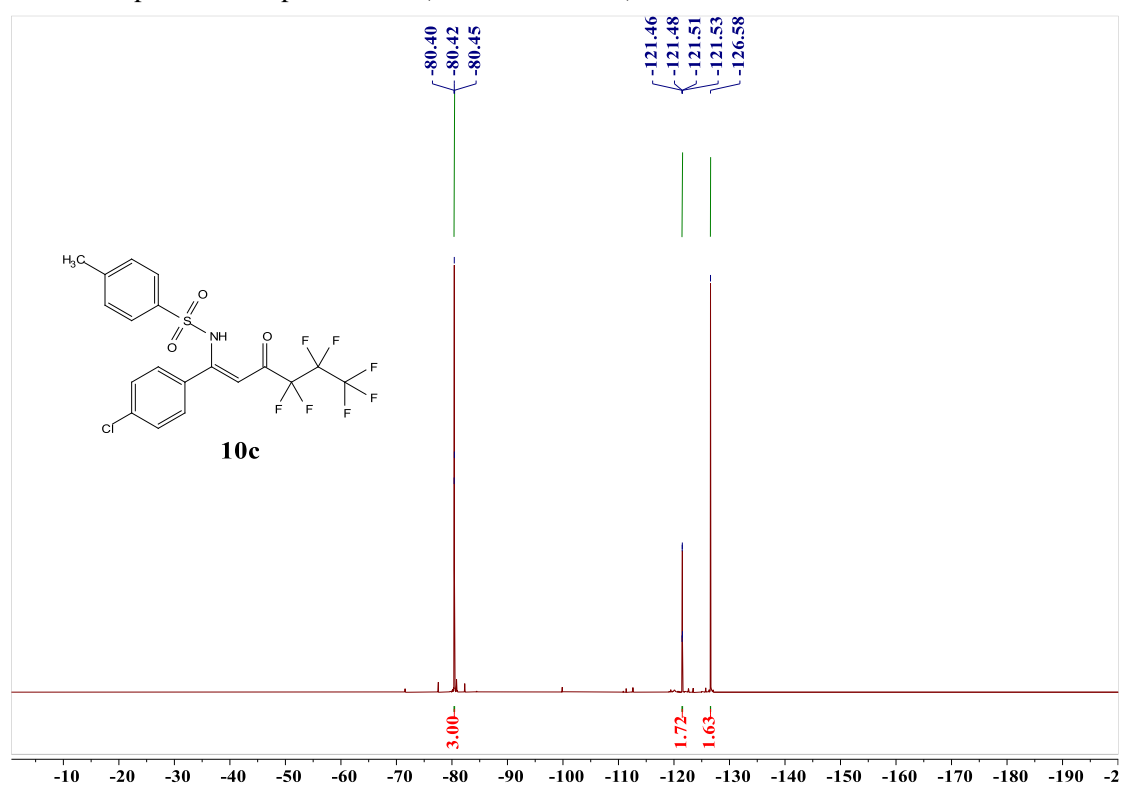

$^{13}\text{C}$  NMR spectra of the product **10c** (100 MHz,  $\text{CDCl}_3$ )

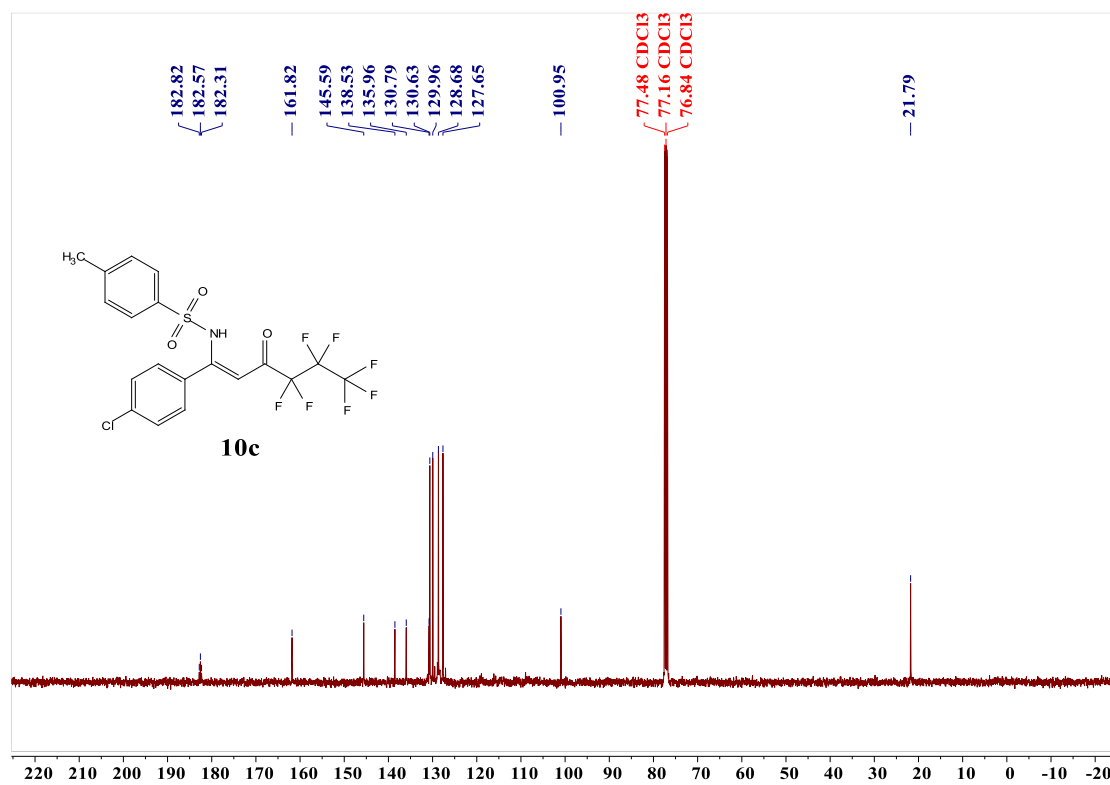

$^1\text{H}$  NMR spectra of the product **12** (400 MHz,  $\text{CDCl}_3$ )

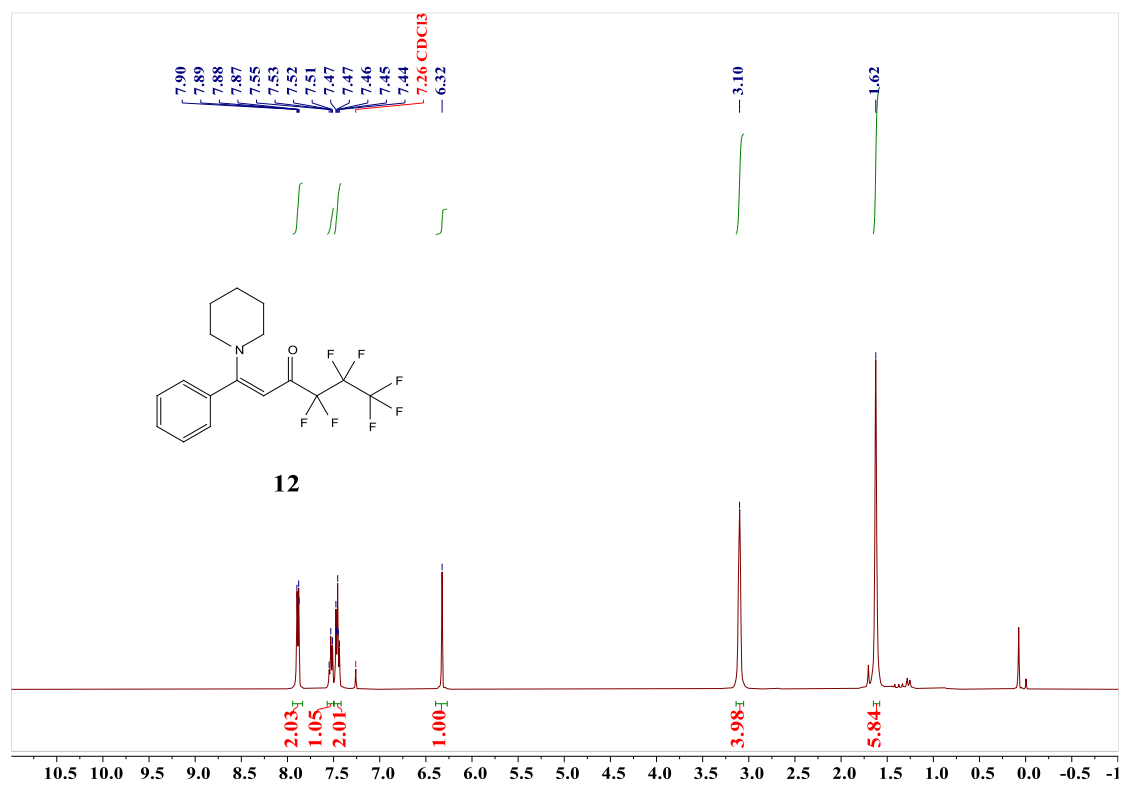

$^{19}\text{F}$  NMR spectra of the product **12** (376 MHz,  $\text{CDCl}_3$ )

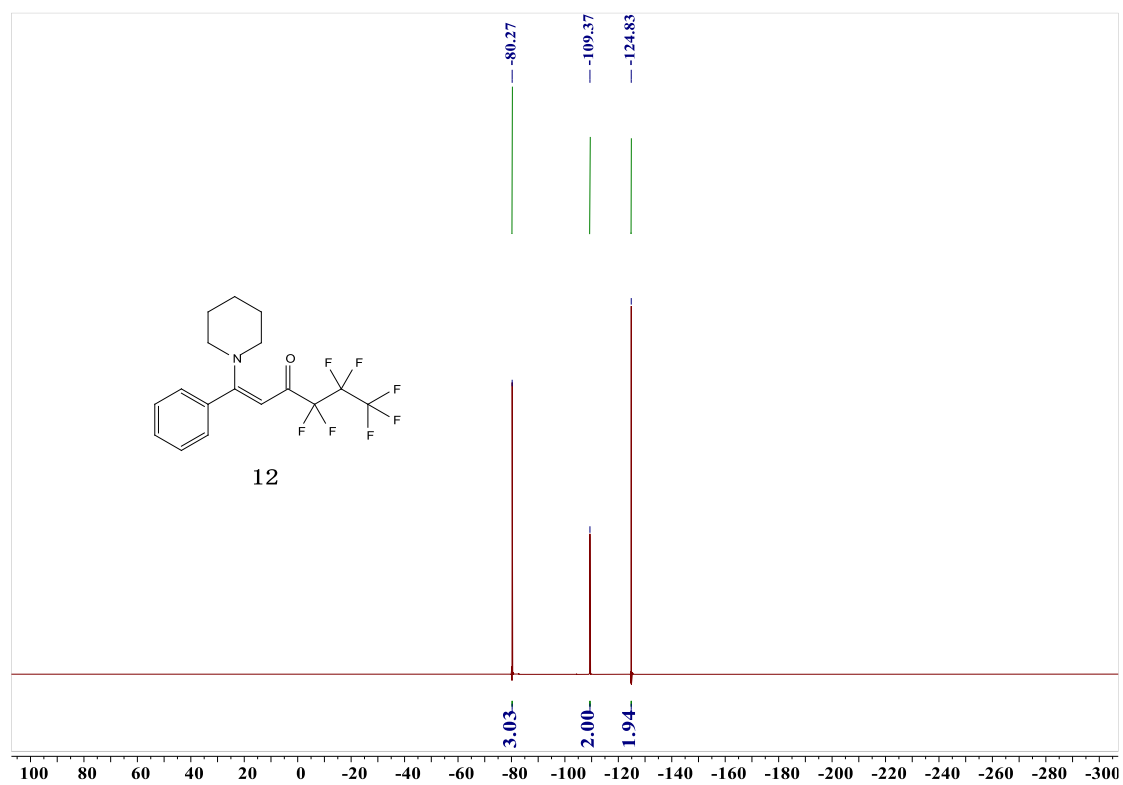

$^{13}\text{C}$  NMR spectra of the product **12** (100 MHz,  $\text{CDCl}_3$ )

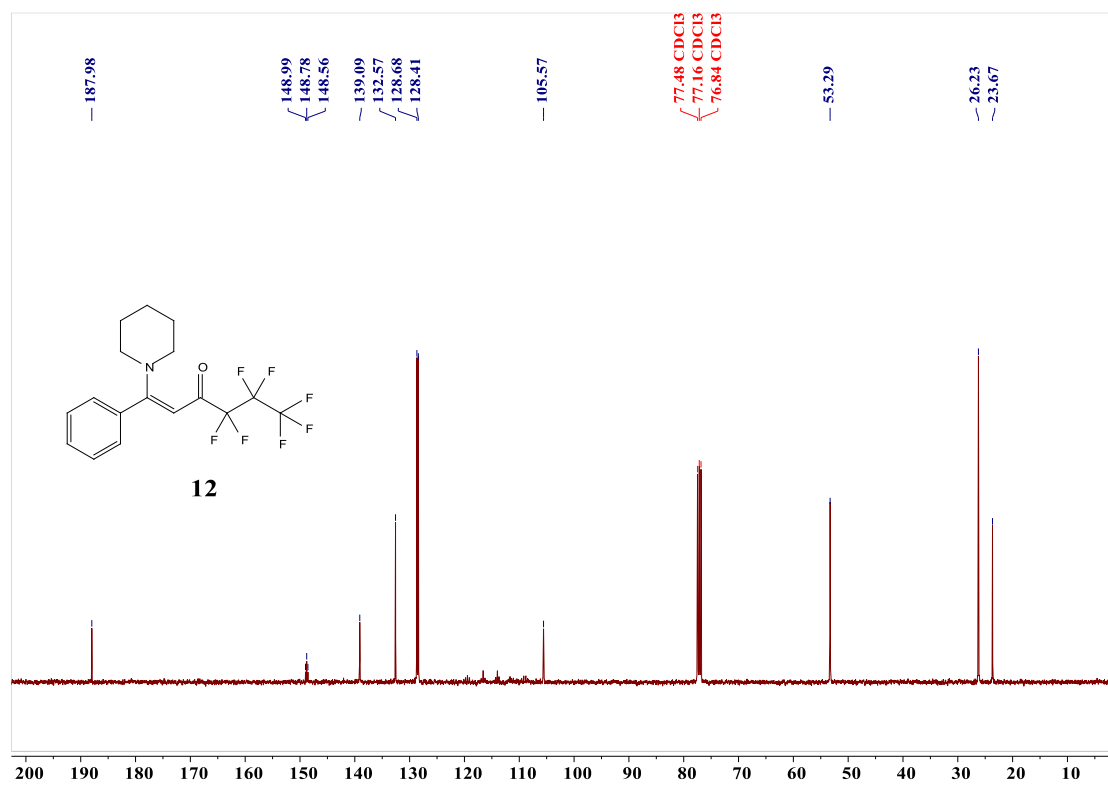

<sup>1</sup>H NMR spectra of the product **16b** (400 MHz, CDCl<sub>3</sub>)

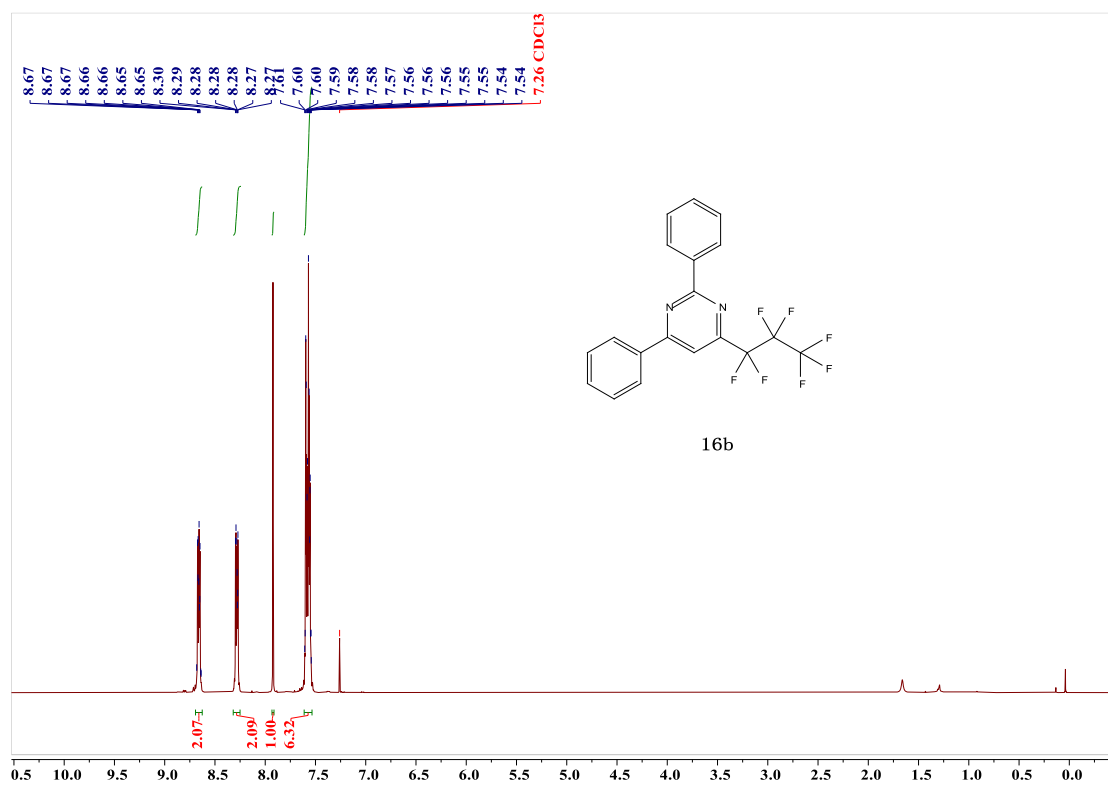

<sup>19</sup>F NMR spectra of the product **16b** (376 MHz, CDCl<sub>3</sub>)

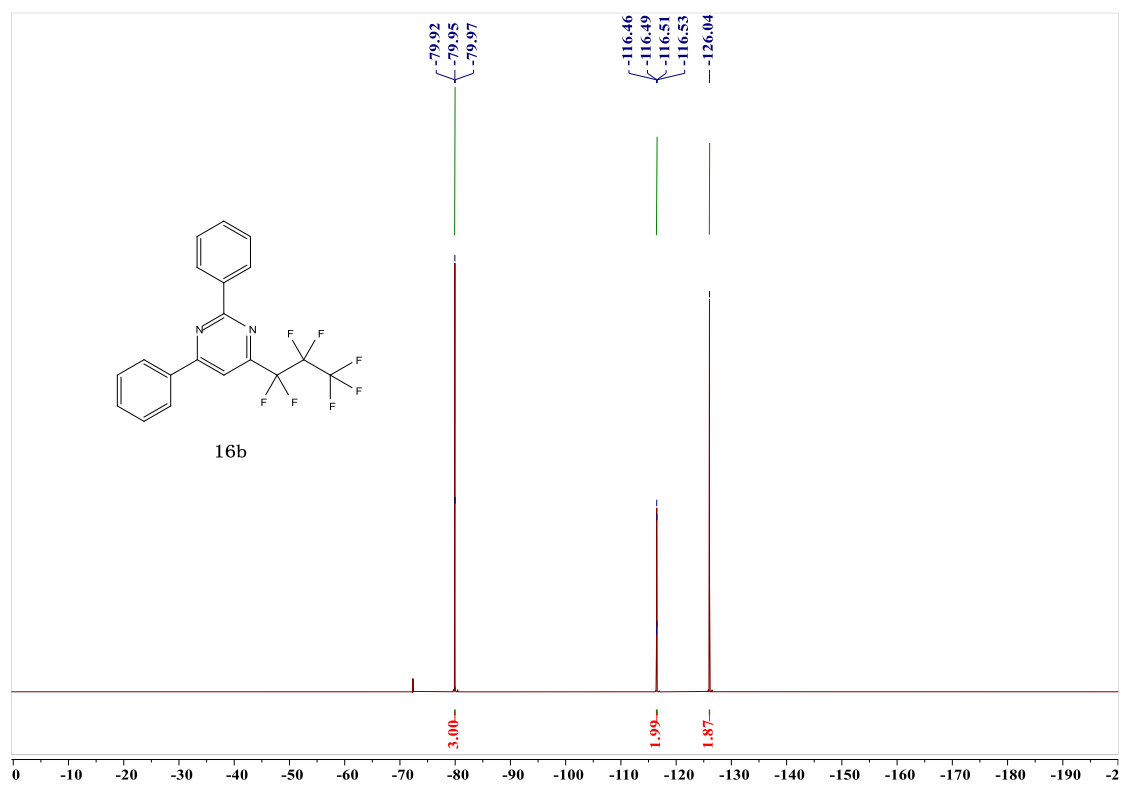

$^{13}\text{C}$  NMR spectra of the product **16b** (100 MHz,  $\text{CDCl}_3$ )

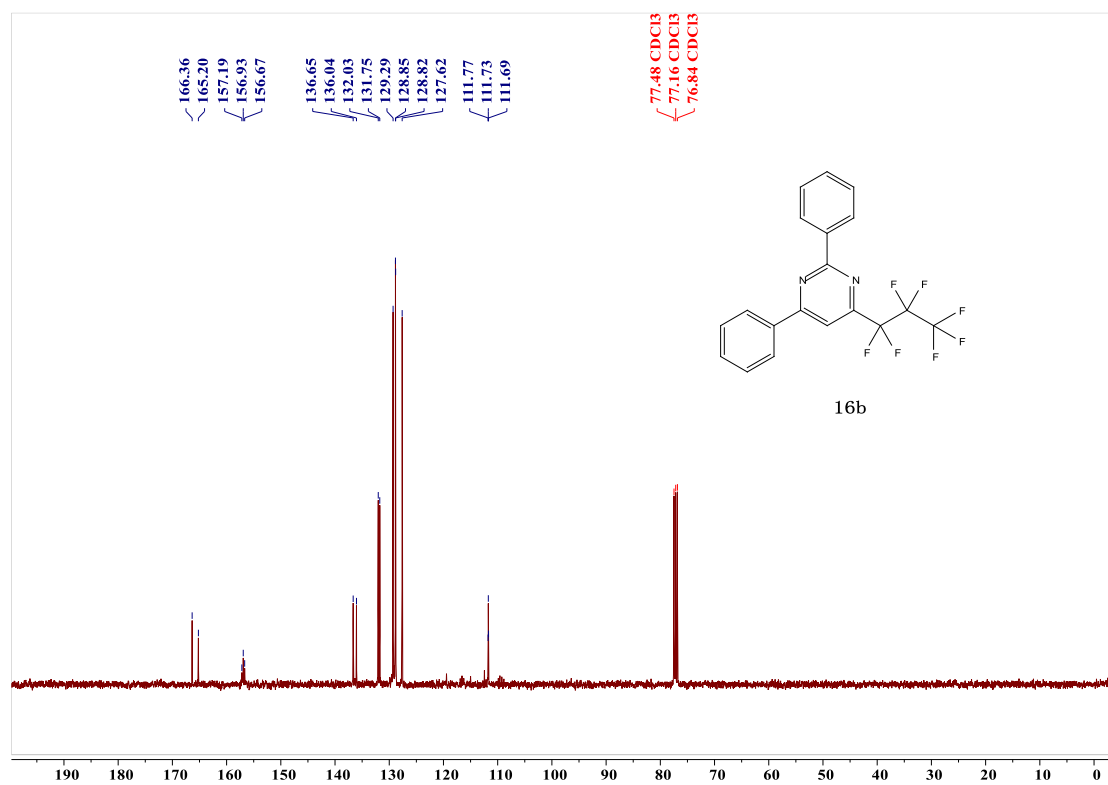

$^1\text{H}$  NMR spectra of the product **16c** (400 MHz,  $\text{CDCl}_3$ )

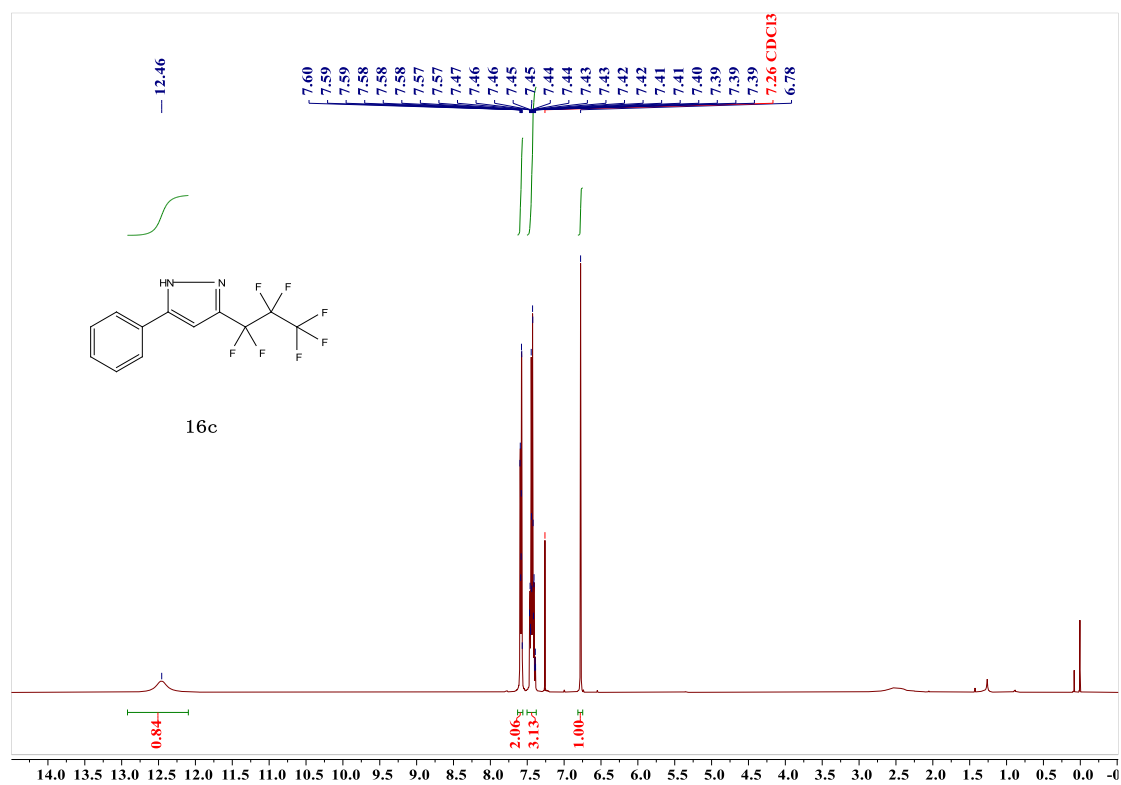

$^{19}\text{F}$  NMR spectra of the product **16c** (376 MHz,  $\text{CDCl}_3$ )

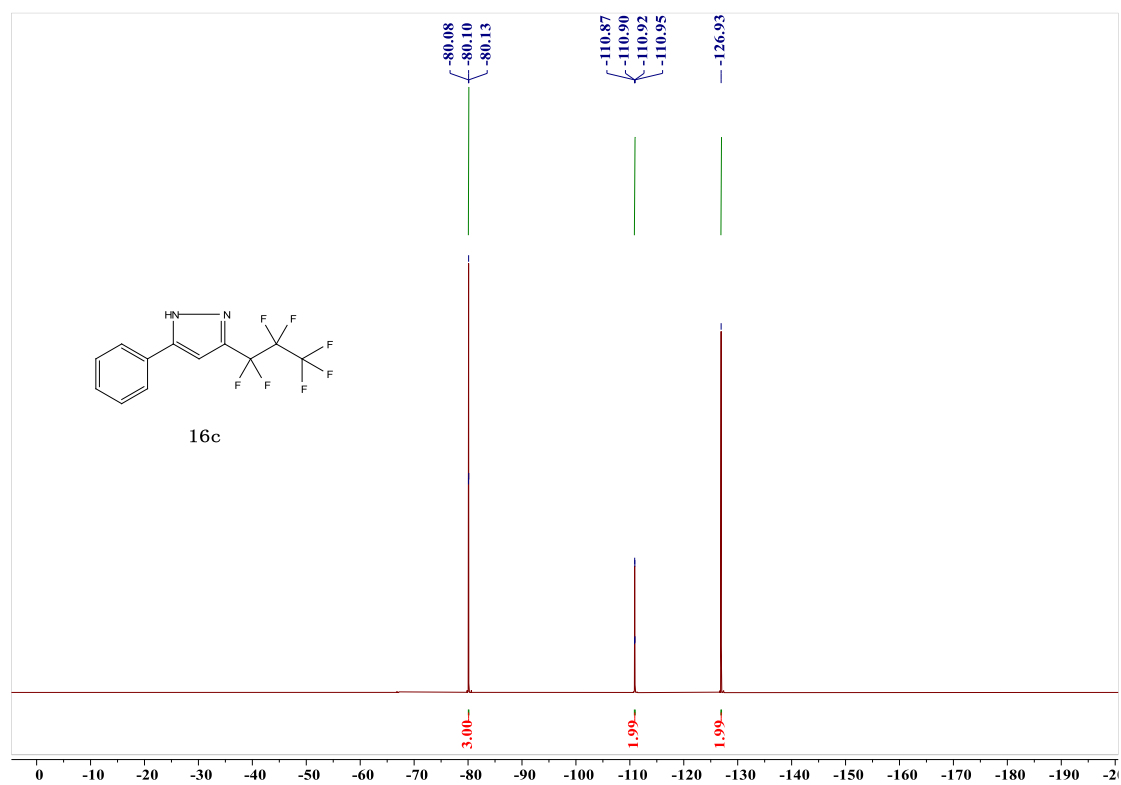

$^{13}\text{C}$  NMR spectra of the product **16c** (100 MHz,  $\text{CDCl}_3$ )

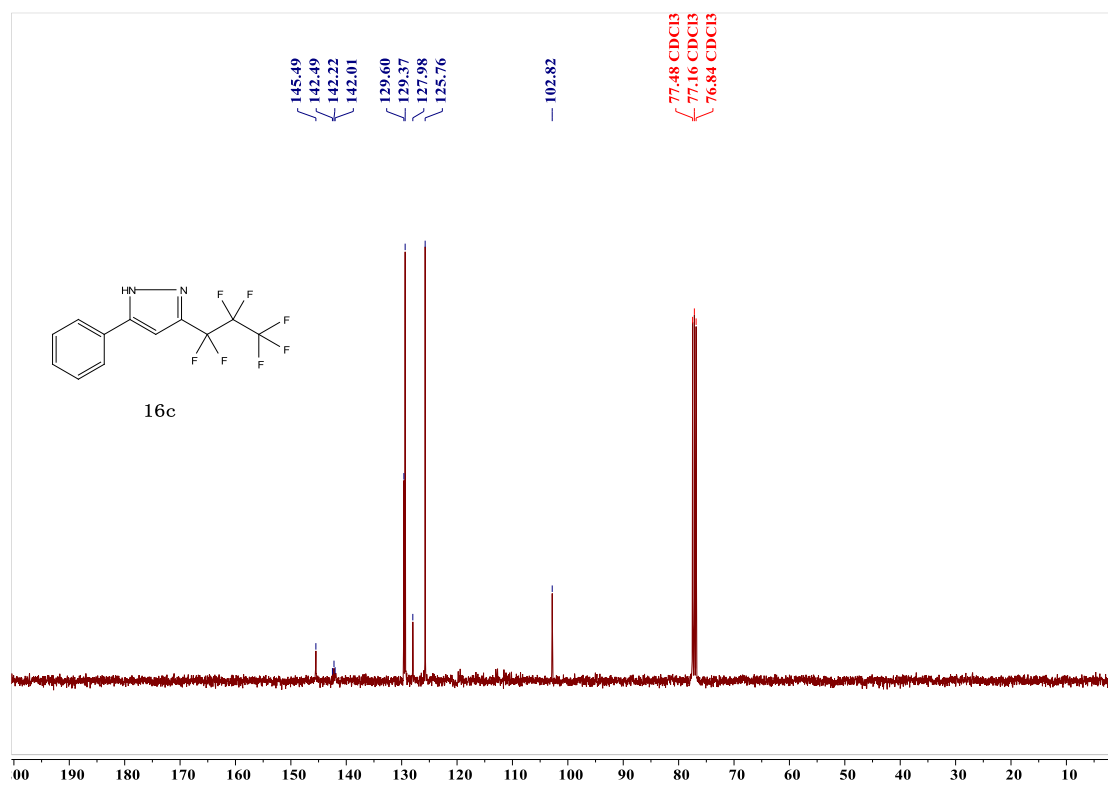

Supplement: d3gc03717g1.pdf [file d3gc03717g1.pdf]
